# Supplementary material
Source: PubMed Central journal article supplement (PMC2849728)

## Supporting information

### Antitumor Agents 274. A New Synthetic Strategy for E-ring SAR Study of Antofine and Cryptopleurine Analogs

Xiaoming Yang,<sup>†</sup> Qian Shi,<sup>†,\*</sup> Kenneth F. Bastow,<sup>‡</sup> and Kuo-Hsiung Lee<sup>†,\*</sup>

<sup>†</sup>*Natural Products Research Laboratories and* <sup>‡</sup>*Division of Medicinal Chemistry and  
Natural Products, Eshelman School of Pharmacy, University of North Carolina,  
Chapel Hill, NC 27599-7568, USA*

\* To whom correspondence should be addressed. QS. Phone: 919-843-6325. Fax: 919-966-3893. E-mail: [qshi1@email.unc.edu](mailto:qshi1@email.unc.edu); KHL. Phone: 919-962-0066. Fax: 919-966-3893. E-mail: [khlee@unc.edu](mailto:khlee@unc.edu)

#### Contents

|                                                                           |        |
|---------------------------------------------------------------------------|--------|
| General experimental information and cytotoxicity assay                   | S2     |
| Detailed experimental procedures                                          | S3-10  |
| <sup>1</sup> H NMR and <sup>13</sup> C NMR spectra of compound <b>3</b>   | S11-12 |
| <sup>1</sup> H NMR and <sup>13</sup> C NMR spectra of compound <b>5-7</b> | S13-18 |
| <sup>1</sup> H NMR and <sup>13</sup> C NMR spectra of compound <b>9</b>   | S19-20 |

## General experimental information

All solvents and reagents are used as purchased. Melting points were measured using a Fisher Johns melting apparatus without correction.  $^1\text{H}$  NMR and  $^{13}\text{C}$  NMR spectra were recorded on a 300 MHz Gemini spectrometer using TMS as internal standard. The solvent used was  $\text{CDCl}_3$  unless indicated. Specific optical rotation was calculated and recorded using JASCO P-2000 polarimeter. High resolution mass spectra were recorded on a Shimadzu LCMS-IT-TOF instrument equipped with an ESI source.

## Cytotoxicity assay

The sulforhodamine B assay was used according to the procedures developed and validated at NCI. The in vitro anticancer activities are expressed as  $\text{IC}_{50}$  values, which is the test compound concentration ( $\mu\text{g}/\text{ml}$ ) that reduced the cell number by 50% after 72h treatment. The values were interpolated from dose-response data. Each test was performed in triplicate with a variation of less than 5%. The  $\text{IC}_{50}$  values determined in each of the independent tests varied less than 10%. Compound stock solutions were prepared in DMSO with the final solvent concentration  $\leq 1\%$  DMSO (v/v), a concentration without effect on cell replication. The cells were cultured at  $37\text{ }^\circ\text{C}$  in RPMI-1640 supplemented with 25 mM *N*-2-hydroxyethylpiperazine-*N*-2-ethanesulfonic acid (HEPES), 2% (w/v) sodium bicarbonate, 10% (v/v) fetal bovine serum, and 100  $\mu\text{g}/\text{mL}$  kanamycin in a humidified atmosphere containing 5%  $\text{CO}_2$ .

***N*-(2,3,6-Trimethoxyphenanthren-9-ylmethyl)-D-serine methyl ester (2):** Compound **1** (15.56 g, 47.73 mmol) was suspended in 400 mL of THF, to which LiAlH<sub>4</sub> (2.729 g, 71.60 mmol) was added carefully at rt. After 2 h, water and 1N NaOH were added to quench the reaction, which was then filtered. Removal of the solvent in vacuo gave a white solid, which was then dissolved in CHCl<sub>3</sub>, washed with water and brine, and dried over MgSO<sub>4</sub>. After removing solvent, the crude product was used in the next step without further purification.

The white solid was suspended in Et<sub>3</sub>N (18 mL) and CH<sub>2</sub>Cl<sub>2</sub> (400 mL) at 0 °C, and then Py•SO<sub>3</sub> (22.90 g, 143.19 mmol) in 80 mL of DMSO was added dropwise. The reaction was monitored by TLC before 150 mL of HCl (1N) was added. The organic layer was then washed with sat. NaHCO<sub>3</sub>, brine, and dried over MgSO<sub>4</sub>.

After evaporation of the solvent, the resulting yellow oil was dissolved in CH<sub>2</sub>Cl<sub>2</sub> (100 mL) and MeOH (300 mL) at 0 °C, to which D-serine hydrochloride (6.22 g, 40 mmol) and Et<sub>3</sub>N (5.70 mL, 41 mmol) were added. The reaction was stirred at 0°C for 30 min before HOAc (4.42 mL, 77.60 mmol) and NaBH<sub>3</sub>CN (5.133 g, 77.60 mmol) were added. The reaction mixture was then warmed to rt and stirred overnight. Sat. NaHCO<sub>3</sub> was added to quench the reaction, and the mixture extracted with CH<sub>2</sub>Cl<sub>2</sub>. The organic layers were collected, washed with brine, dried over Na<sub>2</sub>SO<sub>4</sub>. Column chromatography eluting with CH<sub>2</sub>Cl<sub>2</sub>/MeOH gave **2** (11.38 g 59.7% for three steps) as a light yellow solid: mp 97-99 °C; [ $\alpha$ ]<sub>D</sub><sup>23</sup> = 15.1° (*c* 2.56, CHCl<sub>3</sub>); <sup>1</sup>H NMR (300 MHz, CDCl<sub>3</sub>):  $\delta$  8.12 (d, *J* = 9.0 Hz, 1H), 7.88 (d, *J* = 2.4 Hz, 1H), 7.84 (s, 1H), 7.47 (s, 1H), 7.24 (dd, *J* = 9.0 Hz, *J* = 2.4 Hz, 1H), 7.18 (s, 1H), 4.33 (d, *J* = 12.9 Hz, 1H), 4.13 (d, *J* = 13.2 Hz, 1H), 4.09 (s, 3H), 4.02 (s, 3H), 4.01 (s, 3H), 3.78 (m, 1H), 3.75 (s, 3H); 3.58 (m, 2H); <sup>13</sup>C NMR (75 MHz, CDCl<sub>3</sub>):  $\delta$  173.7, 158.2, 149.8, 149.3, 131.9, 131.5, 127.3, 126.2, 124.9, 124.4 (2×C), 115.4, 108.5, 104.9, 103.6, 62.8, 62.4, 56.3, 56.1, 55.7, 52.4, 50.8; ESI-HRMS ([M + H]<sup>+</sup>) calcd for C<sub>22</sub>H<sub>26</sub>NO<sub>6</sub> 400.1760, found 400.1764.

***(R)*-Methyl-*N*-(2,3,6-trimethoxyphenanthren-9-ylmethyl)-oxazolidinone-4-carboxylate (3):** The ester **2** (6.30 g, 15.77 mmol) was dissolved in 200 mL of CH<sub>2</sub>Cl<sub>2</sub> at room temperature, to which 1,1'-carbonyldiimidazole (5.11 g, 31.54 mmol) was added. The mixture was stirred at reflux overnight. Column chromatography eluting with CH<sub>2</sub>Cl<sub>2</sub>/MeOH gave **3** (5.10 g, 76%) as a light yellow solid: mp 83-85°C; [ $\alpha$ ]<sub>D</sub><sup>23</sup> = 11.5° (*c* 1.36, CHCl<sub>3</sub>); <sup>1</sup>H NMR (300 MHz, CDCl<sub>3</sub>):  $\delta$  7.99 (d, *J* = 9.0 Hz, 1H), 7.83 (d, *J* = 2.4 Hz, 1H), 7.78 (s, 1H), 7.33 (s, 1H), 7.21 (dd, *J* = 9.0 Hz, *J* = 2.4 Hz, 1H), 7.13 (s, 1H), 5.28 (d, *J* = 14.7 Hz, 1H), 4.61 (d, *J* = 14.7 Hz, 1H), 4.28-4.27 (m, 2H), 4.07 (s, 3H), 4.01 (s, 3H), 3.98 (s, 3H), 3.95 (dd, *J* = 8.7 Hz, *J* = 5.4 Hz, 1H), 3.64 (s, 3H); <sup>13</sup>C NMR (75 MHz, CDCl<sub>3</sub>):  $\delta$  170.4, 158.5, 157.4, 149.9, 149.8, 132.0, 127.2, 126.8, 126.3, 126.2, 124.9, 124.3, 115.7, 108.5, 105.2, 103.6, 64.8, 56.3, 56.1 (2×C), 55.7, 52.9, 46.3; ESI-HRMS ([M + H]<sup>+</sup>) calcd for C<sub>23</sub>H<sub>24</sub>NO<sub>7</sub> 426.1553, found 426.1566.

***(R)*-*N*-(2,3,6-Trimethoxyphenanthren-9-ylmethyl)-oxazolidinone-4-carboxylic acid (4):** The oxazolidinone (5.10 g, 12.00 mmol) was dissolved in 1,4-dioxane (100

mL), to which aq. KOH (2N, 50 mL) was added. The mixture was stirred at rt for 1.5 h, and then cooled to 0°C. The pH was adjusted to 3 with 85% H<sub>3</sub>PO<sub>4</sub>. The resulting solid was collected and washed sequentially with cold water, cold MeOH, and diethyl ether. After being dried under vacuum, 4.10 g of white solid were obtained. Yield: 83%; mp 248-250°C;  $[\alpha]_{\text{D}}^{23} = -4.8^\circ$  (*c* 0.23, MeOH); <sup>1</sup>H NMR (300 MHz, DMSO-*d*<sub>6</sub>): δ 8.14 (d, *J* = 2.4 Hz, 1H), 8.07 (s, 1H), 7.97 (d, *J* = 9.3 Hz, 1H), 7.49 (s, 1H), 7.43 (s, 1H), 7.27 (dd, *J* = 9.0 Hz, *J* = 2.4 Hz, 1H), 5.19 (d, *J* = 15.3 Hz, 1H), 4.52 (d, *J* = 15.6 Hz, 1H), 4.44 (t, *J* = 9.3 Hz, 1H), 4.31 (dd, *J* = 9.0 Hz, *J* = 3.3 Hz, 1H), 4.04 (m, 1H), 4.03 (s, 3H), 4.00 (s, 3H), 3.92 (s, 3H); <sup>13</sup>C NMR (75 MHz, DMSO-*d*<sub>6</sub>): δ 171.3, 157.9, 157.2, 149.5, 149.3, 131.6, 127.1, 126.4, 125.3, 124.5, 124.1, 123.6, 115.8, 108.7, 105.1, 104.2, 64.8, 55.9, 55.8, 55.5 (2×C), 45.0; ESI-HRMS ( $[M - H]^-$ ) calcd for C<sub>22</sub>H<sub>20</sub>NO<sub>7</sub> 410.1240, found 410.1255.

**(R)-11,14-Dioxo-12-oxa-antofine (5):** The acid (5.06 g, 12.31 mmol) was suspended in CH<sub>2</sub>Cl<sub>2</sub> (200 mL) and DMF (1 mL), to which (COCl)<sub>2</sub> (3.75 mL, 43.09 mmol) was added. The mixture was stirred for 1 h, and then SnCl<sub>4</sub> (5.76 mL, 49.24 mmol) was added dropwise. The mixture was then warmed to 50°C and stirred overnight. The reactions was quenched with HCl (2N). After normal workup, column chromatography eluting with CH<sub>2</sub>Cl<sub>2</sub>/MeOH gave **5** (4.60 g, 95%) as a light yellow solid: mp 244°C (dec.);  $[\alpha]_{\text{D}}^{23} = -204.4^\circ$  (*c* 0.59, CHCl<sub>3</sub>); <sup>1</sup>H NMR (300 MHz, CDCl<sub>3</sub>): δ 9.07 (s, 1H), 7.95 (d, *J* = 9.3 Hz, 1H), 7.81 (d, *J* = 2.7 Hz, 1H), 7.79 (s, 1H), 7.26 (dd, *J* = 9.3 Hz, *J* = 2.7 Hz, 1H), 5.59 (d, *J* = 18.0 Hz, 1H), 4.93 (dd, *J* = 13.2 Hz, *J* = 9.0 Hz, 1H), 4.92 (d, *J* = 17.7 Hz, 1H), 4.68 (t, *J* = 9.0 Hz, 1H), 4.51 (ddd, *J* = 9.0 Hz, *J* = 4.2 Hz, *J* = 1.5 Hz, 1H), 4.11 (s, 3H), 4.09 (s, 3H), 4.06 (s, 3H); <sup>13</sup>C NMR (75 MHz, CDCl<sub>3</sub>): δ 193.5, 161.4, 157.4, 150.8, 149.4, 139.0, 134.8, 127.0 (2×C), 124.7, 124.3, 121.3, 116.6, 108.1, 104.9, 103.3, 64.9, 58.3, 56.1, 56.0, 55.8, 42.3; ESI-HRMS ( $[M + H]^+$ ) calcd for C<sub>22</sub>H<sub>20</sub>NO<sub>6</sub> 394.1291, found 394.1296.

**(S)-11-Oxo-12-oxa-antofine (6):** The ketone (4.60 g, 11.70 mmol) was suspended in MeOH, to which NaBH<sub>4</sub> (888 mg, 23.40 mmol) was added at rt. The mixture was stirred for 1 h before sat. NaHCO<sub>3</sub> was added. Most solvent was removed by evaporation and the solid was collected by filtration, washed with cold MeOH and diethyl ether. The white solid was then dissolved in TFA (200 mL) and Et<sub>3</sub>SiH (3.75 mL, 23.40 mmol) and refluxed for 1 h. TFA was removed under reduced pressure. Column chromatography eluting with CH<sub>2</sub>Cl<sub>2</sub>/MeOH furnished **6** (4.21 g, 95%) as a white solid: mp 253-255°C;  $[\alpha]_{\text{D}}^{23} = -177.5^\circ$  (*c* 0.44, CHCl<sub>3</sub>); <sup>1</sup>H NMR (300 MHz, CDCl<sub>3</sub>): δ 7.90 (s, 1H), 7.89 (d, *J* = 3.0 Hz, 1H), 7.78 (d, *J* = 9.0 Hz, 1H), 7.24 (dd, *J* = 9.6 Hz, *J* = 3.0 Hz, 1H), 7.22 (s, 1H), 5.18 (d, *J* = 16.5 Hz, 1H), 4.73 (t, *J* = 8.1 Hz, 1H), 4.71 (d, *J* = 16.5 Hz, 1H), 4.34 (dd, *J* = 8.7 Hz, *J* = 5.1 Hz, 1H), 4.17-4.09 (m, 1H), 4.11 (s, 3H), 4.06 (s, 3H), 4.03 (s, 3H), 3.41 (dd, *J* = 15.9 Hz, *J* = 4.2 Hz, 1H), 2.97 (dd, *J* = 15.6 Hz, *J* = 10.8 Hz, 1H); <sup>13</sup>C NMR (75 MHz, CDCl<sub>3</sub> and CD<sub>3</sub>OD): δ 158.3, 157.7, 149.8, 149.0, 130.6, 126.2, 124.2, 124.1, 123.6, 123.1, 122.6, 115.5, 105.0, 104.2, 103.9, 69.2, 56.2, 56.1, 55.7, 50.9, 41.8, 30.8; ESI-HRMS ( $[M + H]^+$ ) calcd for C<sub>22</sub>H<sub>22</sub>NO<sub>5</sub> 380.1498, found 380.1478.

**(S)-(6,7,10-Trimethoxy-1,2,3,4-tetrahydrodibenzo[f,h]isoquinolin-3-yl)methanol (7):** 11-Oxo-12-oxa-antofine (4.21 g, 11.10 mmol) was suspended in 100 mL of MeOH and 50 mL of NaOH (6N), and the mixture was stirred at 100 °C overnight. Most solvent was removed by evaporation and the residue was suspended in 200 mL of cold water. The solid was filtered, washed sequentially with cold MeOH and diethyl ether, and dried under vacuum to give 3.61 g of white solid. Yield: 92%; mp 243-245°C;  $[\alpha]_{\text{D}}^{23} = 100^\circ$  (*c* 0.71, CHCl<sub>3</sub>); <sup>1</sup>H NMR (300 MHz, DMSO-*d*<sub>6</sub>): δ 8.08 (s, 1H), 8.07 (d, *J* = 2.7 Hz, 1H), 7.80 (d, *J* = 9.0 Hz, 1H), 7.31 (s, 1H), 7.21 (dd, *J* = 9.0 Hz, *J* = 2.4 Hz, 1H), 4.79 (t, 8.5 Hz, 1H), 4.42 (d, *J* = 16.2 Hz, 1H), 4.18 (d, *J* = 16.2 Hz, 1H), 4.02 (s, 3H), 3.98 (s, 3H), 3.94 (s, 3H), 3.68-3.63 (m, 1H), 3.56-3.51 (m, 1H), 3.01-2.97 (m, 2H), 2.67-2.58 (m, 1H); <sup>13</sup>C NMR (75 MHz, DMSO-*d*<sub>6</sub>): δ 157.6, 149.6, 148.6, 129.9, 127.8, 127.0, 125.5, 124.4, 123.8, 123.2, 115.7, 105.0 (2×C), 104.2, 65.7, 56.2, 55.8, 55.7, 55.2, 46.1, 29.2; ESI-HRMS ([M + H]<sup>+</sup>) calcd for C<sub>21</sub>H<sub>24</sub>NO<sub>4</sub> 354.1705, found 354.1702.

**(S)-N-Boc-(6,7,10-trimethoxy-1,2,3,4-tetrahydrodibenzo[f,h]isoquinolin-3-yl)methanol (8):** (Boc)<sub>2</sub>O (3.14 g, 14.40 mmol) was added to the amino-alcohol (4.240 g, 12 mmol) in 100 mL of CH<sub>2</sub>Cl<sub>2</sub> and Et<sub>3</sub>N (6 mL), and the mixture was stirred for 2 h. HCl (50 mL, 1N) was added and the organic layer was separated, washed with sat. NaHCO<sub>3</sub> and brine, and dried over MgSO<sub>4</sub>. Column chromatography eluting with CH<sub>2</sub>Cl<sub>2</sub>/MeOH gave 5.20 g of compound **8** as a white solid. Yield: 95.6%; mp 105-107°C;  $[\alpha]_{\text{D}}^{23} = 85.5^\circ$  (*c* 0.42, CHCl<sub>3</sub>); <sup>1</sup>H NMR (300 MHz, CDCl<sub>3</sub>): δ 7.89 (s, 2H), 7.81 (d, *J* = 9.0 Hz, 1H), 7.28 (s, 1H), 7.22 (d, *J* = 8.7 Hz, 1H), 5.29 (br s, 1H), 4.84 (m, 1H), 4.61 (br s, 1H), 4.09 (s, 3H), 4.05 (s, 3H), 4.01 (s, 3H), 3.73-3.62 (m, 2H), 3.27 (dd, *J* = 16.5 Hz, *J* = 6.3 Hz, 1H), 3.18 (t, *J* = 16.5 Hz, 1H), 1.55 (s, 9H); <sup>13</sup>C NMR (75 MHz, CDCl<sub>3</sub>): δ 157.9, 156.2, 149.7, 148.8, 130.4, 126.7, 124.0, 123.9, 123.8, 123.4, 122.8, 115.2, 105.1, 104.2, 104.0, 80.6, 62.7, 56.2, 56.0, 55.7, 50.6, 41.0, 28.6 (3×C), 26.5; ESI-HRMS ([M + H]<sup>+</sup>) calcd for C<sub>26</sub>H<sub>32</sub>NO<sub>6</sub> 454.2230, found 454.2246.

**(S)-tert-Butyl-6,7,10-trimethoxy-3-vinyl-3,4-dihydrodibenzo[f,h]isoquinoline-2(1H)-carboxylate (9):** To a solution of Ph<sub>3</sub>P=CH<sub>2</sub>Br (1.43 g, 4 mmol) in THF was added *n*-BuLi (2M in heptanes, 1.95 mL) at 0 °C under N<sub>2</sub>. The mixture was stirred for 0.5 h before compound **8** (906 mg, 2 mmol) in THF (20 mL) was added dropwise. The mixture was then stirred for 2 h (monitored by TLC). Sat. NH<sub>4</sub>Cl was added to quench the reaction and THF was removed by evaporation. The residue was dissolved in CH<sub>2</sub>Cl<sub>2</sub> (50 mL), washed with sat. NaHCO<sub>3</sub> and brine, and dried over MgSO<sub>4</sub>. Column chromatography eluting with EtOAc/Hexane gave **9** (684 mg, 76%) as a light yellow foam: mp 177-179°C;  $[\alpha]_{\text{D}}^{23} = 118.2^\circ$  (*c* 0.56, CHCl<sub>3</sub>); <sup>1</sup>H NMR (300 MHz, CDCl<sub>3</sub>): δ 7.92 (s, 1H), 7.91 (d, *J* = 2.4 Hz, 1H), 7.85 (d, *J* = 9.0 Hz, 1H), 7.31 (s, 1H), 7.23 (dd, *J* = 9.0 Hz, *J* = 2.7 Hz, 1H), 5.86-5.75 (m, 1H), 5.29 (m, 1H), 5.26 (d, *J* = 16.8 Hz, 1H), 5.16-5.04 (m, 2H), 4.59 (d, *J* = 17.4 Hz, 1H), 4.11 (s, 3H), 4.06 (s, 3H), 4.01 (s, 3H), 3.36 (dd, *J* = 16.2 Hz, *J* = 6.0 Hz, 1H), 3.29 (t, *J* = 16.5 Hz, 1H), 1.55 (s, 9H); <sup>13</sup>C NMR (75 MHz, CDCl<sub>3</sub>): δ 157.9, 155.3, 149.8, 148.8, 136.5, 130.4, 126.8, 124.4, 124.2,

123.9, 123.6, 123.1, 116.6, 115.2, 105.1, 104.3, 104.1, 80.3, 77.4, 56.3, 56.1, 55.7, 41.1, 29.8, 28.7 (3×C); ESI-HRMS ( $[M + Na]^+$ ) calcd for  $C_{27}H_{31}NO_5Na$  472.2100, found 472.2103.

**General procedures for the synthesis of 10a-c:** Compound **9** (225 mg, 0.50 mmol) was dissolved in TFA/ $CH_2Cl_2$  (10 mL) at rt, and the mixture was stirred for 1 h. The solvent was removed by evaporation and TFA was neutralized with NMM. The residue was redissolved in DMF (10 mL), to which the appropriate unsaturated acid (0.70 mmol), EDC hydrochloride (134 mg, 0.70 mmol), HOBt (95 mg, 0.70 mmol), NMM (0.35 mL) were added. Stirring was continued overnight. DMF was then removed under reduced pressure, and the residue was dissolved in  $CH_2Cl_2$  (30 mL), washed with HCl (1N), sat.  $NaHCO_3$ , and brine, and dried over  $MgSO_4$ . Compounds **10a** and **10c** were isolated by column chromatography eluting with MeOH/ $CH_2Cl_2$ . For **10b**, the unsaturated acid (1.50 mmol) was added to a mixture of amine (0.50 mmol), DEPC (0.25 mL, 1.50 mmol), and  $Et_3N$  (0.42 mL, 3.00 mmol) in DMF, which was stirred overnight at room temperature. Standard workup and chromatography with EtOAc/Hexane gave **10b** in 76% yield.

**10a:** mp 104-106°C;  $[\alpha]_D^{23} = 136^\circ$  (*c* 0.58,  $CHCl_3$ );  $^1H$  NMR (300 MHz,  $CDCl_3$ , compound rotameric at rt):  $\delta$  7.86 (m, 3H), 7.26 (s, 1H), 7.21 (dd,  $J = 9.3$  Hz,  $J = 2.4$  Hz, 1H), 6.77 (brs, 1H), 6.40 (d,  $J = 16.8$  Hz, 1H), 5.93-5.57 (m, 3H), 5.24-5.01 (m, 3H), 4.83-4.59 (d,  $J = 17.1$  Hz, 1H), 4.09 (s, 3H), 4.05 (s, 3H), 4.02 (s, 3H), 3.33 (s, 2H);  $^{13}C$  NMR (75 MHz,  $CDCl_3$ ):  $\delta$  166.7, 166.1, 157.9, 149.6, 148.7, 136.0, 130.4, 128.3, 126.3, 123.8, 123.2, 122.0, 117.4, 115.1, 105.1, 104.9, 104.1, 103.8, 57.0, 56.2, 56.0, 55.9, 55.7, 55.5, 52.9, 48.1, 42.7, 40.1, 30.6, 29.8, 28.9; ESI-HRMS ( $[M + H]^+$ ) calcd for  $C_{25}H_{26}NO_4$  404.1862, found 404.1854.

**10b:** mp 170-172°C;  $[\alpha]_D^{23} = 125.1^\circ$  (*c* 0.64,  $CHCl_3$ );  $^1H$  NMR (300 MHz,  $CDCl_3$ , compound rotameric at rt):  $\delta$  7.95-7.73 (m, 3H), 7.32-7.23 (m, 2H), 6.09-6.03 (m, 1H), 5.89-5.77 (m, 3H), 5.27-5.01 (m, 4H), 4.85-4.53 (d,  $J = 17.4$  Hz, 1H), 4.11 (s, 3H), 4.07 (s, 3H), 4.03 (s, 3H), 3.40-3.31 (m, 4H);  $^{13}C$  NMR (75 MHz,  $CDCl_3$ ):  $\delta$  170.5, 170.2, 158.0, 149.8, 148.8, 135.9, 135.6, 131.7, 131.4, 130.5, 126.4, 124.6, 124.2, 123.9, 123.4, 122.1, 118.2, 117.3, 115.4, 115.1, 105.2, 104.3, 103.9, 56.2, 56.1, 55.7, 53.1, 47.9, 42.7, 39.9, 39.8, 39.4, 30.7, 29.0; ESI-HRMS ( $[M + H]^+$ ) calcd for  $C_{26}H_{28}NO_4$  418.2018, found 418.2024.

**10c:** mp 73-75°C;  $[\alpha]_D^{23} = 144.6^\circ$  (*c* 0.35,  $CHCl_3$ );  $^1H$  NMR (300 MHz,  $CDCl_3$ , compound rotameric at rt):  $\delta$  7.94-7.75 (m, 3H), 7.31-7.22 (m, 2H), 5.98-5.76 (m, 3H), 5.19-4.99 (m, 5H), 4.84-4.53 (d,  $J = 17.1$  Hz, 1H), 4.10 (s, 3H), 4.06 (s, 3H), 4.00 (s, 3H), 3.33 (d,  $J = 18.6$  Hz, 2H), 2.65 (q,  $J = 7.2$  Hz, 2), 2.55-2.46 (m, 2H);  $^{13}C$  NMR (75 MHz,  $CDCl_3$ ):  $\delta$  171.8, 171.5, 158.0, 149.7, 148.8, 137.6, 136.1, 135.8, 130.5, 126.7, 126.4, 124.5, 124.4, 124.0, 123.9, 123.5, 123.1, 122.0, 117.3, 117.1, 115.5, 115.1, 105.2, 104.3, 103.9, 56.2, 56.1, 55.7, 52.9, 47.8, 42.5, 39.9, 33.6, 33.0, 30.8, 29.5, 29.0; ESI-HRMS ( $[M + H]^+$ ) calcd for  $C_{27}H_{30}NO_4$  432.2175, found 432.2184.

**General procedures for the synthesis of 11a-c:** Compounds **10a-c** were dissolved in degassed CH<sub>2</sub>Cl<sub>2</sub> under N<sub>2</sub>, to which Grubb's 2<sup>nd</sup> generation catalyst in CH<sub>2</sub>Cl<sub>2</sub> was added in one portion. The reaction was stirred at reflux for 2 h or monitored by TLC. Compounds **11a-c** were isolated by column chromatography eluting with CH<sub>2</sub>Cl<sub>2</sub>/MeOH. Yield: 70% - 85%.

**11a:** mp 105-107°C; [ $\alpha$ ]<sub>D</sub><sup>23</sup> = -191.8° (*c* 0.55, CHCl<sub>3</sub>); <sup>1</sup>H NMR (300 MHz, CDCl<sub>3</sub>):  $\delta$  7.90 (s, 1H), 7.89 (d, *J* = 3.3 Hz, 1H), 7.87 (d, *J* = 9.0 Hz, 1H), 7.42 (d, *J* = 5.7 Hz, 1H), 7.25 (s, 1H), 7.24 (dd, *J* = 9.0 Hz, *J* = 2.7 Hz, 1H), 6.39 (d, *J* = 6.0 Hz, 1H), 5.49 (d, *J* = 17.1 Hz, 1H), 4.75 (d, *J* = 17.7 Hz, 1H), 4.35 (dd, *J* = 12 Hz, *J* = 5.4 Hz, 1H), 4.11 (s, 3H), 4.06 (s, 3H), 4.02 (s, 3H), 3.62 (dd, *J* = 15.9 Hz, *J* = 4.5 Hz, 1H), 2.71 (dd, *J* = 15.0 Hz, 12.0 Hz, 1H); <sup>13</sup>C NMR (75 MHz, CDCl<sub>3</sub>):  $\delta$  169.5, 158.2, 149.8, 149.0, 147.4, 130.6, 128.6, 126.2, 124.4, 124.1, 123.9, 123.4, 122.4, 115.4, 105.2, 104.2, 104.0, 57.7, 56.2, 56.1, 55.7, 40.2, 30.0; ESI-HRMS ([M + H]<sup>+</sup>) calcd for C<sub>23</sub>H<sub>22</sub>NO<sub>4</sub> 376.1549, found 376.1559.

**11b:** mp 238-240°C; [ $\alpha$ ]<sub>D</sub><sup>23</sup> = -216.4° (*c* 0.58, CHCl<sub>3</sub>); <sup>1</sup>H NMR (300 MHz, CDCl<sub>3</sub>):  $\delta$  7.93 (d, *J* = 9.3 Hz, 1H), 7.90-7.89 (m, 2H), 7.23-7.21 (m, 2H), 6.07 (d, *J* = 17.7 Hz, 1H), 6.03-5.90 (m, 2H), 4.49 (d, *J* = 17.4 Hz, 1H), 4.40-4.36 (m, 1H), 4.11 (s, 3H), 4.05 (s, 3H), 4.02 (s, 3H), 3.35 (dd, *J* = 15.6 Hz, *J* = 2.4 Hz, 1H), 3.13 (brs, 2H), 3.04-2.99 (m, 1H); <sup>13</sup>C NMR (75 MHz, CDCl<sub>3</sub>):  $\delta$  166.4, 158.1, 149.7, 148.8, 130.5, 126.2, 125.1, 124.7, 124.6, 123.9, 123.8, 123.5, 122.2, 115.2, 105.1, 104.1, 103.9, 56.2, 56.1, 55.7, 54.6, 42.8, 34.8, 32.1; ESI-HRMS ([M + H]<sup>+</sup>) calcd for C<sub>24</sub>H<sub>24</sub>NO<sub>4</sub> 390.1705, found 390.1706.

**11c:** mp 205-207°C; [ $\alpha$ ]<sub>D</sub><sup>23</sup> = 81.9° (*c* 1.50, CHCl<sub>3</sub>); <sup>1</sup>H NMR (300 MHz, CDCl<sub>3</sub>):  $\delta$  8.08 (d, *J* = 9.0 Hz, 1H), 7.93 (s, 1H), 7.90 (d, *J* = 2.7 Hz, 1H), 7.36 (s, 1H), 7.25 (dd, *J* = 9.0 Hz, *J* = 2.4 Hz, 1H), 5.75-5.70 (m, 1H), 5.59-5.54 (m, 1H), 5.32 (d, *J* = 15.9 Hz, 1H), 4.97 (d, *J* = 16.2 Hz, 1H), 4.89 (m, 1H), 4.11 (s, 3H), 4.08 (s, 3H), 4.01 (s, 3H), 3.37 (dd, *J* = 15.3 Hz, *J* = 5.4 Hz, 1H), 3.25 (dd, *J* = 15.3 Hz, *J* = 8.1 Hz, 1H), 3.10 (dt, *J* = 13.2 Hz, *J* = 8.1 Hz, 1H), 2.56 (dt, *J* = 13.5 Hz, 4.8 Hz, 1H), 2.42 (m, 2H); <sup>13</sup>C NMR (75 MHz, CDCl<sub>3</sub>):  $\delta$  173.8, 158.0, 149.9, 148.9, 131.6, 130.6, 130.5, 128.2, 125.8, 125.7, 125.0, 124.0, 123.2, 115.4, 105.1, 104.3, 103.7, 56.2, 56.1, 55.7, 51.6, 40.9, 35.1, 31.7, 25.2; ESI-HRMS ([M + H]<sup>+</sup>) calcd for C<sub>25</sub>H<sub>26</sub>NO<sub>4</sub> 404.1862, found 404.1856.

**General procedure for the synthesis of 12a-c:** Compounds **11a-d** were dissolved in MeOH, to which Pd/C was added. The mixture was hydrogenated under H<sub>2</sub> at 50 psi overnight. The catalyst was removed by filtration and column chromatography eluting with CH<sub>2</sub>Cl<sub>2</sub>/MeOH gave **12a-c**. Yield: 90%.

**12a:** mp 185-187°C; [ $\alpha$ ]<sub>D</sub><sup>23</sup> = -134.4° (*c* 0.45, CHCl<sub>3</sub>); <sup>1</sup>H NMR (300 MHz, CDCl<sub>3</sub>):  $\delta$  7.84 (s, 1H), 7.83 (d, *J* = 3.0 Hz, 1H), 7.79 (d, *J* = 9.0 Hz, 1H), 7.20 (dd, *J* = 9.0 Hz, *J* = 2.7 Hz, 1H), 7.19 (s, 1H), 5.29 (d, *J* = 17.4 Hz, 1H), 4.50 (d, *J* = 17.1 Hz, 1H), 4.08 (s,

3H), 4.03 (s, 3H), 4.00 (s, 3H), 3.91-3.84 (m, 1H), 3.36 (dd,  $J = 15.6$  Hz,  $J = 4.2$  Hz, 1H), 2.73 (dd,  $J = 15.6$  Hz, 11.1 Hz, 1H), 2.59-2.44 (m, 3H), 2.05-2.44 (m, 1H);  $^{13}\text{C}$  NMR (75 MHz,  $\text{CDCl}_3$ ):  $\delta$  174.2, 158.1, 149.7, 148.8, 130.4, 126.4, 124.4, 124.0, 123.9, 123.8, 123.4, 115.2, 105.1, 104.2, 104.0, 56.1, 56.0, 55.7, 53.3, 41.1, 33.5, 30.3, 25.5; ESI-HRMS ( $[\text{M} + \text{H}]^+$ ) calcd for  $\text{C}_{23}\text{H}_{24}\text{NO}_4$  378.1705, found 378.1713.

**12b:** mp 257-259°C;  $[\alpha]_{\text{D}}^{23} = -183.6^\circ$  ( $c$  1.9,  $\text{CHCl}_3$ );  $^1\text{H}$  NMR (300 MHz,  $\text{CDCl}_3$ ):  $\delta$  7.88 (d,  $J = 9.0$  Hz, 1H), 7.86 (s, 1H), 7.85 (d,  $J = 3.0$  Hz, 1H), 7.21 (dd,  $J = 9.0$  Hz,  $J = 2.7$  Hz, 1H), 7.16 (s, 1H), 5.88 (d,  $J = 17.4$  Hz, 1H), 4.41 (d,  $J = 17.4$  Hz, 1H), 4.09 (s, 3H), 4.04 (s, 3H), 4.00 (s, 3H), 3.79-3.74 (m, 1H), 3.11-3.02 (m, 2H), 2.52 (t,  $J = 6.0$  Hz, 2H), 2.28-2.20 (m, 1H), 2.05-1.96 (m, 1H), 1.94-1.84 (m, 2H);  $^{13}\text{C}$  NMR (75 MHz,  $\text{CDCl}_3$ ):  $\delta$  169.7, 157.9, 149.6, 148.7, 130.4, 126.2, 124.7, 124.6, 124.0, 123.7, 123.5, 115.1, 105.1, 104.1, 103.9, 56.2, 56.1, 55.7, 52.7, 43.4, 34.0, 33.1, 29.2, 18.6; ESI-HRMS ( $[\text{M} + \text{H}]^+$ ) calcd for  $\text{C}_{24}\text{H}_{26}\text{NO}_4$  392.1862, found 392.1865.

**12c:** mp 232-234°C;  $[\alpha]_{\text{D}}^{23} = 47.2^\circ$  ( $c$  0.97,  $\text{CHCl}_3$ );  $^1\text{H}$  NMR (300 MHz,  $\text{CDCl}_3$ ):  $\delta$  8.12 (d,  $J = 9.0$  Hz, 1H), 7.95 (s, 1H), 7.92 (d,  $J = 2.4$  Hz, 1H), 7.38 (s, 1H), 7.26 (dd,  $J = 9.0$  Hz,  $J = 2.4$  Hz, 1H), 5.23 (d,  $J = 15.9$  Hz, 1H), 4.97 (d,  $J = 15.9$  Hz, 1H), 4.12 (s, 3H), 4.09 (s, 3H), 4.02 (s, 3H), 3.96-3.92 (m, 1H), 3.39 (dd,  $J = 15.0$  Hz,  $J = 5.4$  Hz, 1H), 3.15 (dd,  $J = 15.3$  Hz, 6.9 Hz, 1H), 2.66-2.64 (m, 2H), 1.88-1.84 (m, 3H), 1.65-1.56 (m, 3H);  $^{13}\text{C}$  NMR (75 MHz,  $\text{CDCl}_3$ ):  $\delta$  175.0, 158.0, 149.9, 148.9, 130.4, 127.4, 126.0, 125.7, 125.1, 124.1, 123.2, 115.4, 105.1, 104.4, 103.8, 56.2, 56.1, 55.7, 54.3, 40.0, 37.0, 34.4, 32.4, 28.2, 23.1; ESI-HRMS ( $[\text{M} + \text{H}]^+$ ) calcd for  $\text{C}_{25}\text{H}_{28}\text{NO}_4$  406.2018, found 406.2024.

**General procedure for the synthesis of *R*-antofine (13a), *R*-cryptopleurine (13b), and compound 13c:** The amides **12a-c** and  $\text{LiAlH}_4$  (2 equiv.) were suspended in THF (15 mL), which was stirred for 2-3 h. Water was then added to quench the reaction, followed by aq. NaOH (1N, 1mL) and  $\text{H}_2\text{O}$  (1 mL). The mixture was filtered and then extracted with  $\text{CHCl}_3$  and dried over  $\text{MgSO}_4$ . Column chromatography eluting with  $\text{CH}_2\text{Cl}_2/\text{MeOH}$  gave the target products. Yield: 70% -80%.

***R*-Antofine (13a):** mp 204-206°C (lit.<sup>9</sup> 206-211°C);  $[\alpha]_{\text{D}}^{23} = -129.2^\circ$  ( $c$  0.48,  $\text{CHCl}_3$ , lit.<sup>9</sup>  $[\alpha]_{\text{D}}^{19} = -125.2^\circ$ ); IR (FT-IR ATR,  $\text{cm}^{-1}$ ) 2830, 1616, 1507, 1259, 1030;  $^1\text{H}$  NMR (300 MHz,  $\text{CDCl}_3$ ):  $\delta$  7.92 (s, 1H), 7.90 (d,  $J = 2.4$  Hz, 1H), 7.82 (d,  $J = 9.0$  Hz, 1H), 7.32 (s, 1H), 7.20 (dd,  $J = 9.0$  Hz,  $J = 2.7$  Hz, 1H), 4.69 (d,  $J = 15.9$  Hz, 1H), 4.11 (s, 3H), 4.07 (s, 3H), 4.02 (s, 3H), 3.69 (d,  $J = 14.7$  Hz, 1H), 3.46 (dt,  $J = 8.7$  Hz,  $J = 1.8$  Hz, 1H), 3.35 (dd,  $J = 16.2$  Hz,  $J = 2.4$  Hz, 1H), 2.90 (dd,  $J = 15.6$  Hz,  $J = 10.8$  Hz, 1H), 2.51-2.41 (m, 2H), 2.26-2.21 (m, 1H), 2.05-1.91 (m, 2H), 1.83-1.74 (m, 1H);  $^{13}\text{C}$  NMR (75 MHz,  $\text{CDCl}_3$ ):  $\delta$  157.6, 149.6, 148.5, 130.3, 127.3, 126.8, 125.7, 124.4, 124.3, 123.7, 115.0, 104.9, 104.2, 104.1, 60.4, 56.2, 56.0, 55.7, 55.2, 54.0, 33.9, 31.5, 21.8; ESI-HRMS ( $[\text{M} + \text{H}]^+$ ) calcd for  $\text{C}_{23}\text{H}_{26}\text{NO}_3$  364.1913, found 364.1918.

***R*-Cryptopleurine (13b):** mp 201-203°C (lit.<sup>9</sup> 195-197°C);  $[\alpha]_{\text{D}}^{23} = -108.8^\circ$  ( $c$  0.64,



CHCl<sub>3</sub>, lit.<sup>9</sup>  $[\alpha]_{\text{D}}^{21} = -108.7^\circ$ ; IR (FT-IR ATR, cm<sup>-1</sup>) 2828, 1507, 1472, 1255, 1230, 1205, 1036, 831; <sup>1</sup>H NMR (300 MHz, CDCl<sub>3</sub>):  $\delta$  7.87 (s, 1H), 7.86 (d,  $J = 3.0$  Hz, 1H), 7.76 (d,  $J = 9.0$  Hz, 1H), 7.20 (s, 1H), 7.17 (dd,  $J = 9.0$  Hz,  $J = 2.7$  Hz, 1H), 4.39 (d,  $J = 15.6$  Hz, 1H), 4.08 (s, 3H), 4.04 (s, 3H), 3.99 (s, 3H), 3.56 (d,  $J = 15.3$  Hz, 1H), 3.24 (d,  $J = 11.1$  Hz, 1H), 3.00 (dd,  $J = 16.5$  Hz,  $J = 3.0$  Hz, 1H), 2.82 (dd,  $J = 15.9$  Hz,  $J = 10.5$  Hz, 1H), 2.33-2.21 (m, 2H), 2.01-1.97 (m, 1H), 1.89-1.84 (m, 1H), 1.78 (m, 2H), 1.52-1.45 (m, 2H); <sup>13</sup>C NMR (75 MHz, CDCl<sub>3</sub>):  $\delta$  157.5, 149.5, 148.4, 130.2, 126.6, 125.7, 124.6, 124.2, 123.8, 123.5, 114.9, 104.8, 104.0 (2 $\times$ C), 57.6, 56.4, 56.2, 56.1, 56.0, 55.6, 34.9, 33.9, 26.1, 24.5; ESI-HRMS ( $[\text{M} + \text{H}]^+$ ) calcd for C<sub>24</sub>H<sub>28</sub>NO<sub>3</sub> 378.2069, found 378.2077.

**13c**: mp 193-195°C;  $[\alpha]_{\text{D}}^{23} = -82.6^\circ$  ( $c$  0.38, CHCl<sub>3</sub>); IR (FT-IR ATR, cm<sup>-1</sup>) 2826, 1609, 1507, 1472, 1418, 1257, 1037; <sup>1</sup>H NMR (300 MHz, CDCl<sub>3</sub>):  $\delta$  7.90 (s, 1H), 7.89 (d,  $J = 2.4$  Hz, 1H), 7.78 (d,  $J = 9.0$  Hz, 1H), 7.27 (s, 1H), 7.19 (dd,  $J = 9.0$  Hz,  $J = 2.7$  Hz, 1H), 4.42 (d,  $J = 15.0$  Hz, 1H), 4.10 (s, 3H), 4.06 (s, 3H), 4.05 (d,  $J = 15.3$  Hz, 1H), 4.01 (s, 3H), 3.07-2.93 (m, 4H), 2.82-2.77 (m, 1H), 1.95-1.59 (m, 8H); <sup>13</sup>C NMR (75 MHz, CDCl<sub>3</sub>):  $\delta$  157.5, 149.5, 148.4, 130.2, 127.1, 126.0, 124.3 (2 $\times$ C), 124.1, 123.6, 115.0, 104.9, 104.2, 104.0, 60.6, 57.3, 56.2, 56.1, 55.7, 55.4, 35.8, 33.9, 29.2, 27.8, 24.7; ESI-HRMS ( $[\text{M} + \text{H}]^+$ ) calcd for C<sub>25</sub>H<sub>30</sub>NO<sub>3</sub> 392.2226, found 392.2225.

**14**: Similar procedures as **10a-c**. mp 74-76°C;  $[\alpha]_{\text{D}}^{23} = 71.5^\circ$  ( $c$  1.16, CHCl<sub>3</sub>); <sup>1</sup>H NMR (400 MHz, CDCl<sub>3</sub>, compound rotameric at rt):  $\delta$  7.89-7.84 (m, 3H), 7.28 (s, 1H), 7.21 (dd,  $J = 9.2$  Hz,  $J = 2.8$  Hz, 1H), 5.88-5.61 (m, 2H), 5.20-5.10 (m, 3H), 4.64 (d,  $J = 3.2$  Hz, 1H), 4.54 (m, 1H), 4.46 (d,  $J = 3.2$  Hz), 4.09 (s, 3H), 4.05 (s, 3H), 4.00 (s, 3H), 3.73 (s, 3H), 3.43-3.28 (m, 2H); <sup>13</sup>C NMR (100 MHz, CDCl<sub>3</sub>):  $\delta$  165.9, 162.6, 157.9, 157.2, 149.7, 148.8, 135.9, 130.4, 126.5, 124.3, 123.8, 123.7, 123.3, 117.7, 115.2, 105.0, 104.1, 103.9, 56.1, 56.0, 55.6, 55.3, 53.8, 39.6, 36.5, 31.5, 30.3; ESI-HRMS ( $[\text{M} + \text{H}]^+$ ) calcd for C<sub>26</sub>H<sub>27</sub>NO<sub>5</sub> 433.1889, found 434.1963.

**15**: Similar procedures as **11a-c**. mp 135-137°C;  $[\alpha]_{\text{D}}^{23} = -235^\circ$  ( $c$  1.11, CHCl<sub>3</sub>); <sup>1</sup>H NMR (400 MHz, CDCl<sub>3</sub>):  $\delta$  7.80 (s, 1H), 7.79 (d,  $J = 2.8$  Hz, 1H), 7.72 (d,  $J = 8.8$  Hz, 1H), 7.20-7.17 (m, 2H), 6.00 (d,  $J = 2.4$  Hz, 1H), 5.37 (d,  $J = 17.6$  Hz, 1H), 4.65 (d,  $J = 17.2$  Hz, 1H), 4.16-4.12 (m, 1H), 4.10 (s, 3H), 4.03 (s, 3H), 4.00 (s, 3H), 3.86 (s, 3H), 3.52 (dd,  $J = 11.6$  Hz,  $J = 4.8$  Hz, 1H), 2.53 (dd,  $J = 15.6$  Hz,  $J = 11.6$  Hz, 1H); <sup>13</sup>C NMR (100 MHz, CDCl<sub>3</sub>):  $\delta$  163.9, 158.0, 153.1, 149.5, 148.7, 130.4, 126.0, 124.1, 124.0, 123.2, 123.2, 122.4, 115.3, 108.7, 104.9, 104.0, 103.9, 57.5, 56.1, 56.0, 55.6, 52.4, 40.4, 31.4; ESI-HRMS ( $[\text{M} + \text{H}]^+$ ) calcd for C<sub>24</sub>H<sub>23</sub>NO<sub>5</sub> 405.1567, found 406.1667.

**16**: Similar procedures as **13a-c**. mp 202-204°C;  $[\alpha]_{\text{D}}^{23} = -97.0^\circ$  ( $c$  0.47, CHCl<sub>3</sub>); <sup>1</sup>H NMR (400 MHz, CDCl<sub>3</sub>):  $\delta$  7.91 (s, 1H), 7.90 (d,  $J = 2.4$  Hz, 1H), 7.80 (d,  $J = 8.8$  Hz, 1H), 7.33 (s, 1H), 7.20 (dd,  $J = 9.2$  Hz,  $J = 2.4$  Hz, 1H), 4.83 (s, 1H), 4.52 (d,  $J = 14.4$  Hz, 1H), 4.10 (s, 3H), 4.06 (s, 3H), 4.05 (d,  $J = 14.4$  Hz, 1H), 4.01 (s, 3H), 3.83 (d,  $J = 7.2$  Hz, 1H), 3.72 (s, 3H), 3.58 (m, 2H), 3.32 (d,  $J = 15.2$  Hz, 1H), 3.02 (m, 1H); <sup>13</sup>C

NMR (100 MHz, CDCl<sub>3</sub>):  $\delta$  159.7, 157.7, 149.6, 148.6, 130.2, 127.7, 127.6, 125.8, 124.5, 124.4, 123.7, 115.1, 104.8, 104.3, 104.0, 95.3, 63.7, 57.8, 57.0, 56.2, 56.0, 55.7, 51.8, 33.8; ESI-HRMS ([M + H]<sup>+</sup>) calcd for C<sub>24</sub>H<sub>25</sub>NO<sub>4</sub> 391.1784, found 392.1865.

**S-12-oxo-antofine (17):** Compound 16 (300 mg) was refluxed in HCl/THF for 2h before the solvent was evaporated. NaOH was used for neutralization and CH<sub>2</sub>Cl<sub>2</sub> used for extraction. Chromatography gave 200 mg light yellow solid (68%). mp 240-242°C;  $[\alpha]_{\text{D}}^{23} = -34.7^\circ$  (*c* 0.91, CHCl<sub>3</sub>); IR (FT-IR ATR, cm<sup>-1</sup>) 2833, 1751, 1609, 1510, 1260, 1234, 1208, 1202, 1126, 867, 777; <sup>1</sup>H NMR (400 MHz, CDCl<sub>3</sub>):  $\delta$  7.92 (s, 1H), 7.91 (d, *J* = 2.4 Hz, 1H), 7.78 (d, *J* = 8.8 Hz, 1H), 7.27 (s, 1H), 7.22 (dd, *J* = 9.2 Hz, *J* = 2.6 Hz, 1H), 4.70 (d, *J* = 14.8 Hz, 1H), 4.11 (s, 3H), 4.06 (s, 3H), 4.02 (s, 3H), 3.84 (d, *J* = 15.2 Hz, 1H), 3.78 (d, *J* = 16.8 Hz, 1H), 3.43 (d, *J* = 13.2 Hz, 1H), 3.07-3.01 (m, 2H), 2.98 (d, *J* = 16.4 Hz, 1H), 2.76 (dd, *J* = 17.6 Hz, *J* = 5.2 Hz, 1H), 2.43 (dd, *J* = 17.6 Hz, *J* = 10.0 Hz, 1H); <sup>13</sup>C NMR (100 MHz, CDCl<sub>3</sub>):  $\delta$  212.4, 157.7, 149.5, 148.6, 130.2, 126.6, 125.7, 124.5, 124.0, 123.7, 123.6, 115.1, 104.7, 103.8, 103.7, 63.1, 57.9, 56.0, 55.9, 53.4, 44.7, 33.2; ESI-HRMS ([M + H]<sup>+</sup>) calcd for C<sub>23</sub>H<sub>23</sub>NO<sub>4</sub> 377.1627, found 378.1704.

**S-12N-methyl-12-aza-antofine (18):** The Boc aldehyde was obtained using the same procedure as for **9**. MeNH<sub>2</sub> hydrochloride were added to the aldehyde in MeOH, followed by addition of AcOH and NaBH<sub>3</sub>CN, which was stirred at r.t. for 4h. Sat. NaHCO<sub>3</sub> was added to quench the reaction and CH<sub>2</sub>Cl<sub>2</sub> was used for extraction. The residue was purified through a quick TLC column and TFA was used to remove the Boc group. Then TFA was removed by evaporation and the residue was dissolved in CH<sub>2</sub>Cl<sub>2</sub> (10 ml), to which K<sub>2</sub>CO<sub>3</sub> (100 mg) and MgSO<sub>4</sub> (0.5 g) were added, followed by HCHO (37%, 0.1 ml). The mixture was stirred at r.t. overnight. Chromatography gave 15 mg off-white solid. Yield: 45% over four steps. mp 182-184 °C;  $[\alpha]_{\text{D}}^{23} = -45.0^\circ$  (*c* 0.34, CHCl<sub>3</sub>); IR (FT-IR ATR, cm<sup>-1</sup>) 2832, 1616, 1512, 1257, 1032; <sup>1</sup>H NMR (300 MHz, CDCl<sub>3</sub>):  $\delta$  7.90 (s, 1H), 7.89 (d, *J* = 2.7 Hz, 1H), 7.76 (d, *J* = 9.0 Hz, 1H), 7.26 (s, 1H), 7.19 (dd, *J* = 9.0 Hz, *J* = 2.7 Hz, 1H), 4.57 (d, *J* = 14.7 Hz, 1H), 4.11 (d, *J* = 5.1 Hz, 1H), 4.10 (s, 3H), 4.05 (s, 3H), 4.01 (s, 3H), 3.80 (d, *J* = 15.0 Hz, 1H), 3.62 (d, *J* = 5.1 Hz, 1H), 3.41 (dd, *J* = 8.4 Hz, *J* = 5.1 Hz, 1H), 3.48 (d, *J* = 12.9 Hz, 1H), 3.01-2.95 (m, 2H), 2.85-2.79 (m, 1H), 2.62 (s, 3H); <sup>13</sup>C NMR (100 MHz, CDCl<sub>3</sub>):  $\delta$  157.9, 149.7, 148.7, 130.4, 126.9, 125.8, 124.6, 124.3, 124.0, 123.8, 115.2, 104.9, 104.1, 104.0, 78.0, 61.0, 59.2, 56.2, 56.1, 55.7, 50.4, 43.5, 31.0; ESI-HRMS ([M + H]<sup>+</sup>) calcd for C<sub>23</sub>H<sub>26</sub>N<sub>2</sub>O<sub>3</sub> 378.1943, found 379.2025.

STANDARD 1H OBSERVE *Compound-3*

Pulse Sequence: s2pu1  
Solvent: CDCl3  
Ambient temperature  
GEMINI-300 "m56965"

Relax. delay 1.000 sec  
Pulse 7.0 usec  
Acq. time 1.998 sec  
Width 4500.5 Hz  
16 repetitions  
OBSERVE H1, 299.9337733 MHz  
DATA PROCESSING  
FT size 32768  
Total time 0 min, 0 sec

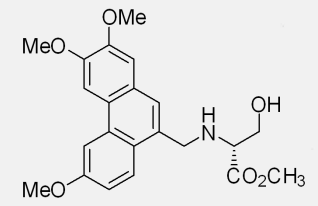

**compound 3**

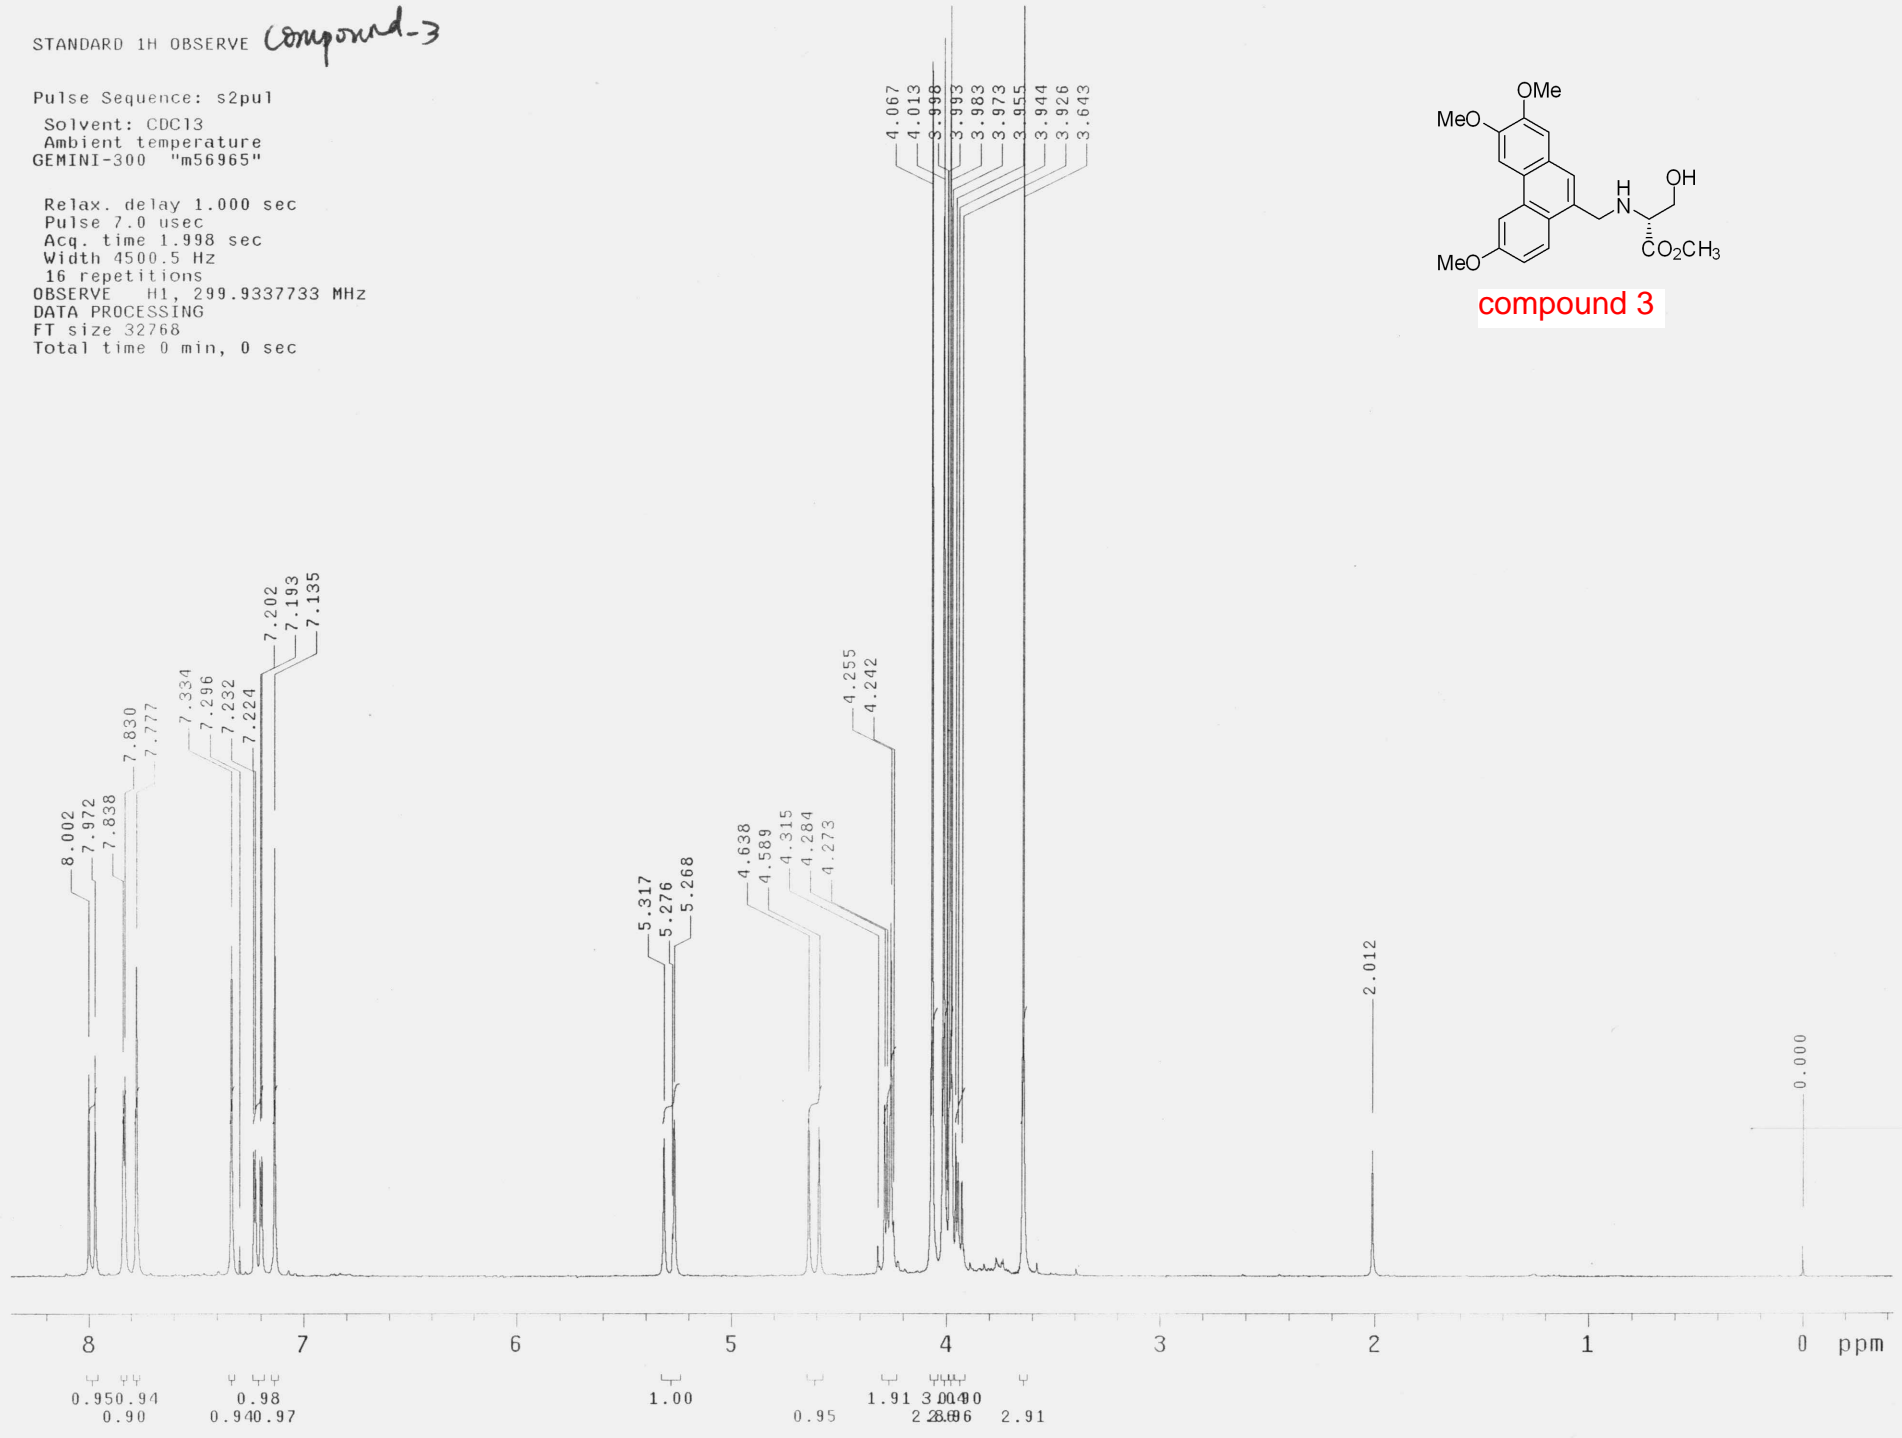

yxmsoccer-compound-3

Pulse Sequence: s2pul

Solvent: CDC13

Ambient temperature

GEMINI-300 "m56965"

Relax. delay 0.100 sec

Pulse 8.0 usec

Acq. time 1.706 sec

Width 18761.7 Hz

692 repetitions

OBSERVE C13, 75.4184049 MHz

DECOUPLE H1, 299.9352868 MHz

Power 0 dB

continuously on

WALTZ-16 modulated

DATA PROCESSING

Line broadening 1.0 Hz

FT size 65536

Total time 1 hr, 36 min, 45 sec

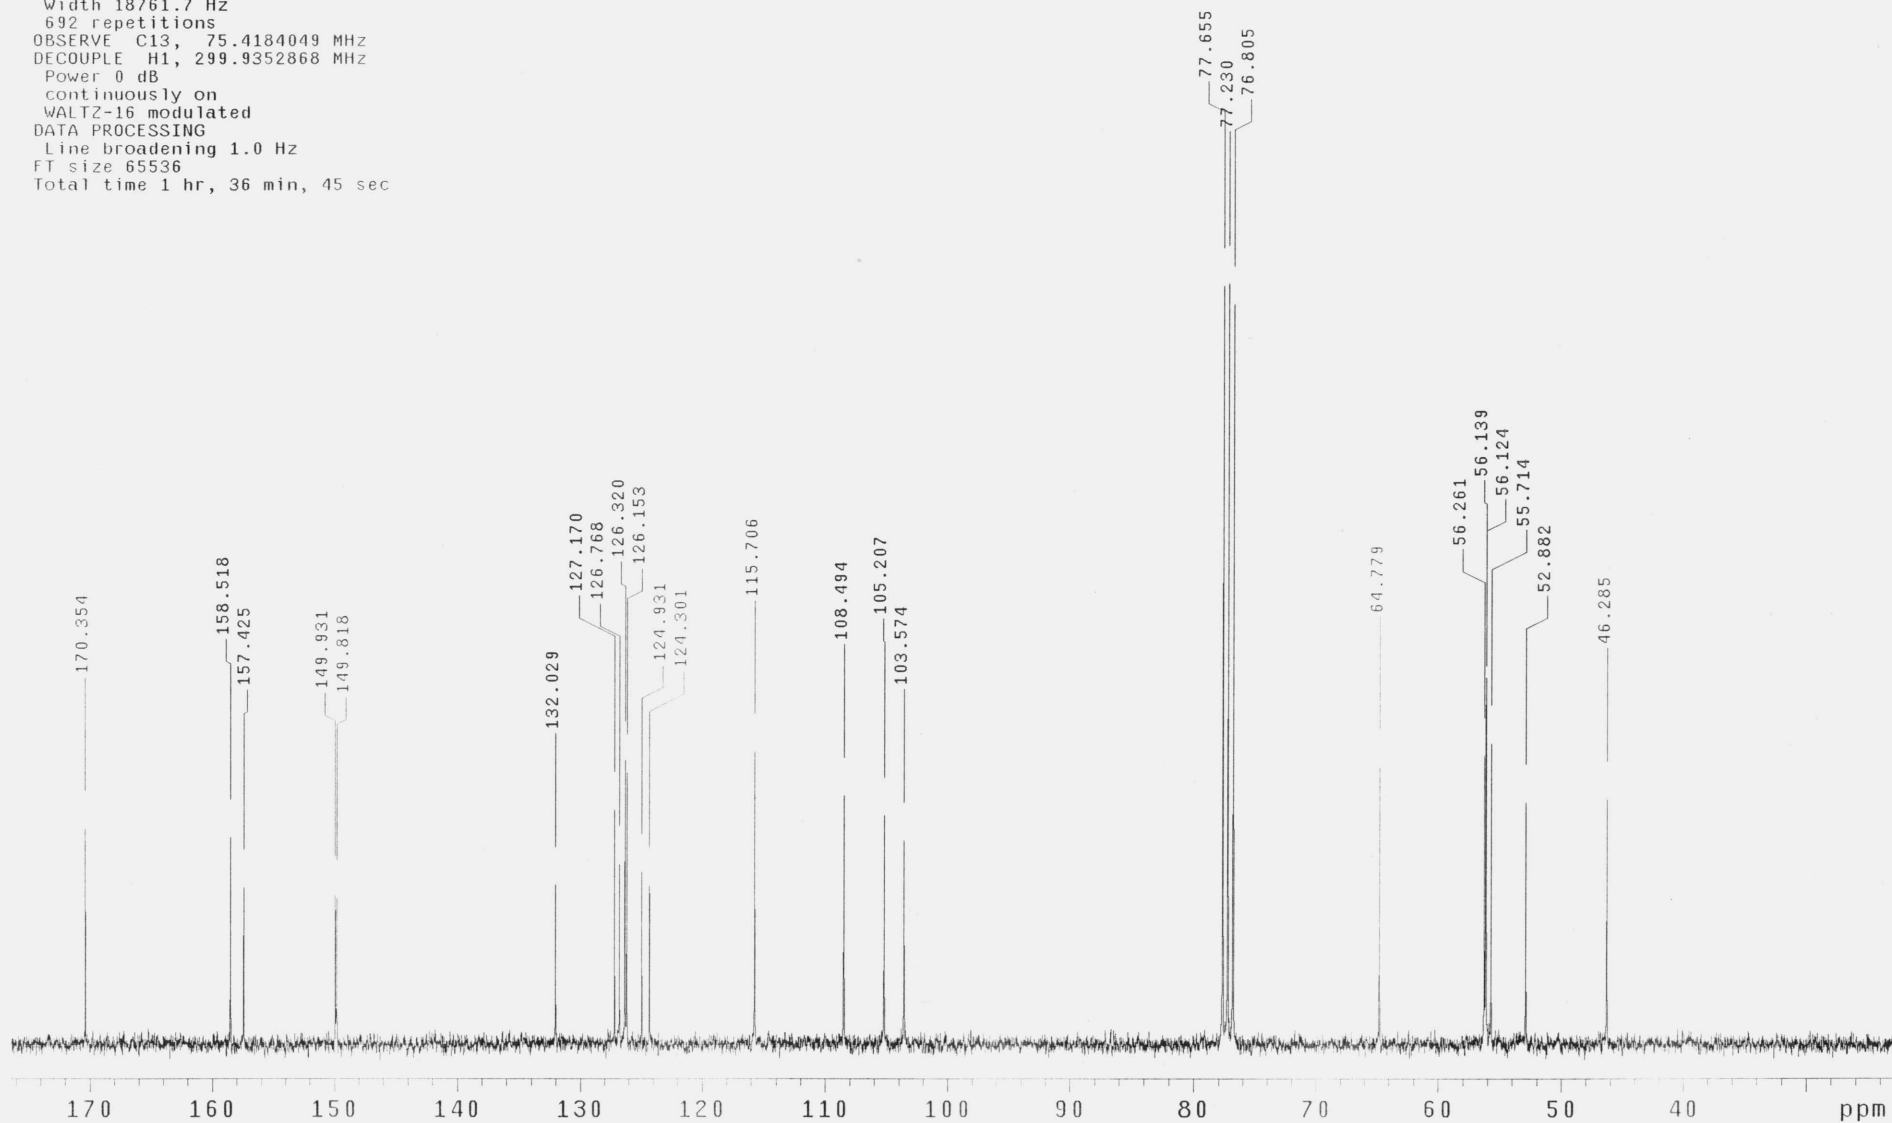

yxmsoccer-compound5

Pulse Sequence: s2pu1

Solvent: CDC13  
Ambient temperature  
GEMINI-300 "m56965"

Relax. delay 1.000 sec  
Pulse 7.0 usec  
Acq. time 1.998 sec  
Width 4500.5 Hz  
32 repetitions  
OBSERVE H1, 299.9337840 MHz  
DATA PROCESSING  
FT size 32768  
Total time 1 min, 47 sec

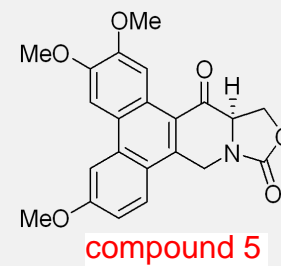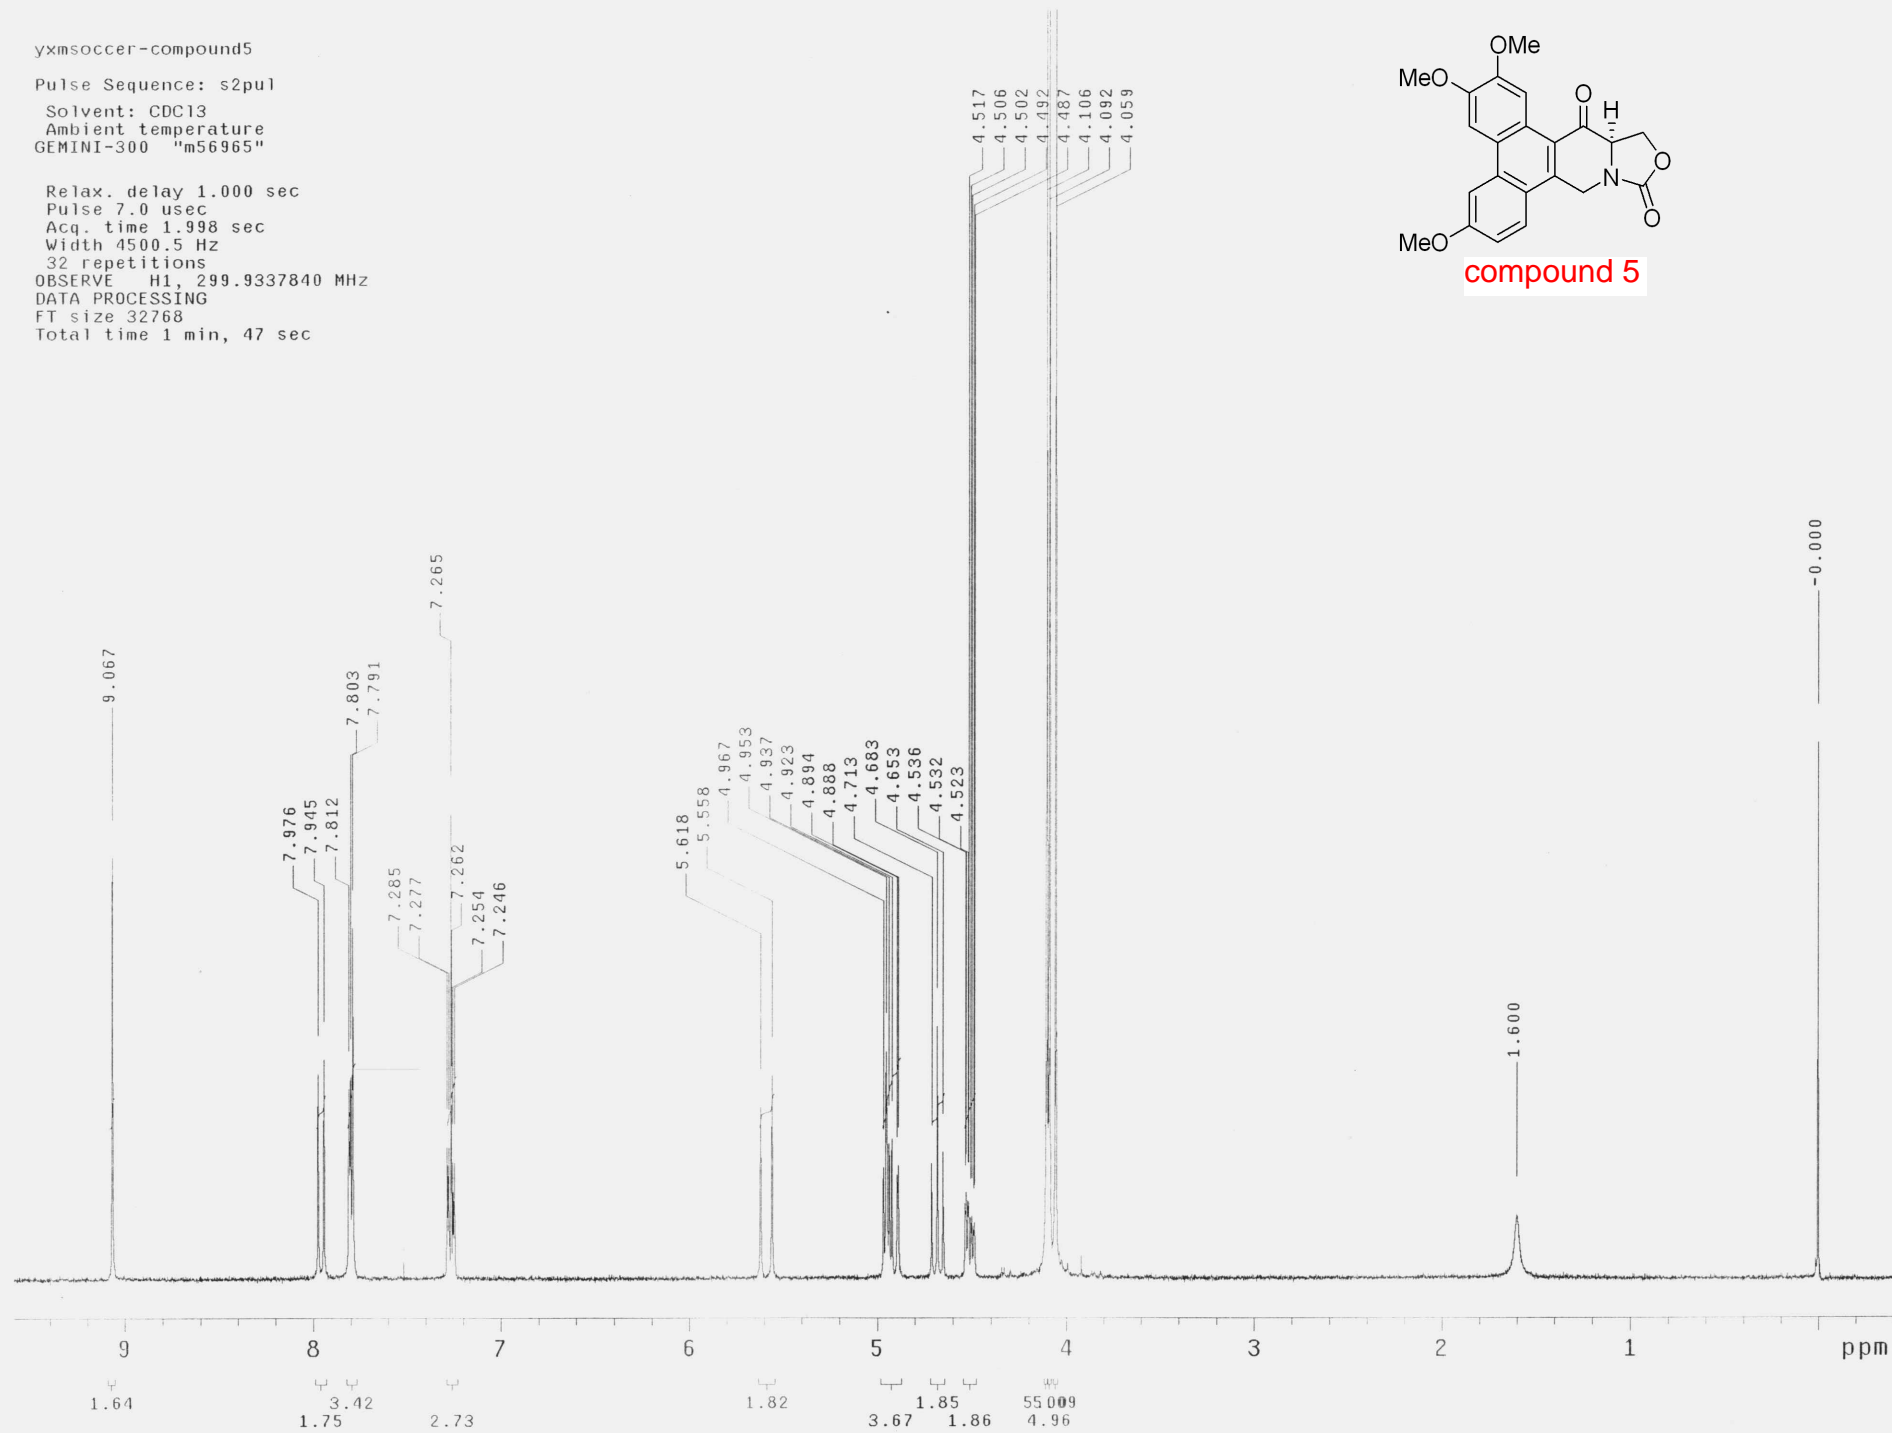

yxmsoccer-compound-5

Pulse Sequence: s2pu1

Solvent: CDC13  
Ambient temperature  
GEMINI-300 "m56965"

Relax. delay 0.100 sec  
Pulse 8.0 usec  
Acq. time 1.706 sec  
Width 18761.7 Hz  
3348 repetitions  
OBSERVE C13, 75.4184009 MHz  
DECOUPLE H1, 299.9352868 MHz  
Power 0 dB  
continuously on  
WALTZ-16 modulated  
DATA PROCESSING  
Line broadening 1.0 Hz  
FT size 65536  
Total time 8 hr, 3 min, 47 sec

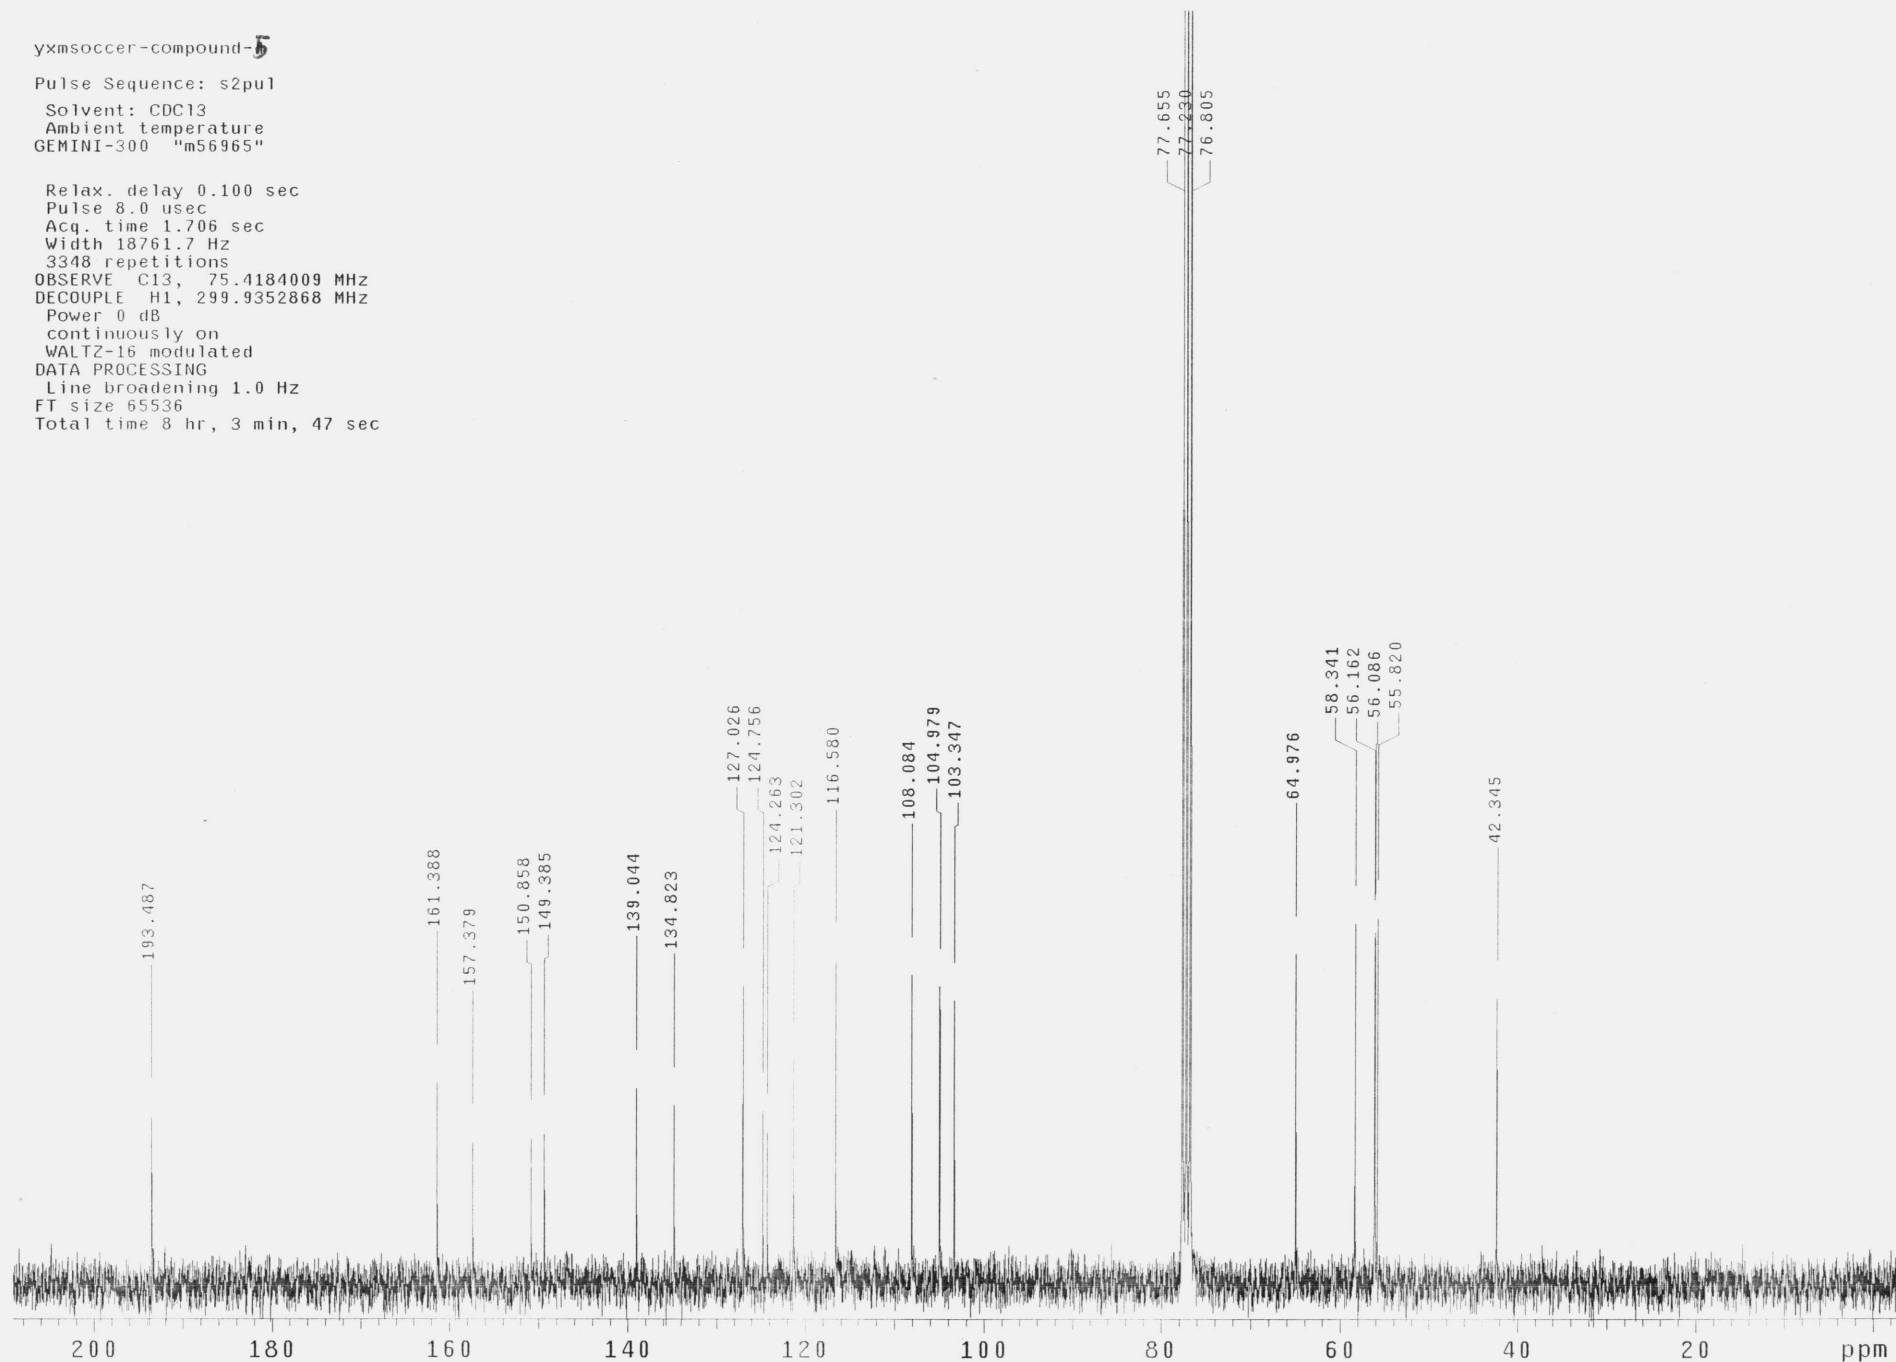



yxmsoccer-compound-6

Pulse Sequence: s2pu1

Solvent: CDC13  
Ambient temperature  
GEMINI-300 "m56965"

Relax. delay 0.100 sec  
Pulse 8.0 usec  
Acq. time 1.706 sec  
Width 18761.7 Hz  
1092 repetitions  
OBSERVE C13, 75.4184018 MHz  
DECOUPLE H1, 299.9352868 MHz  
Power 0 dB  
continuously on  
WALTZ-16 modulated  
DATA PROCESSING  
Line broadening 1.0 Hz  
FT size 65536  
Total time 2 hr, 25 min, 8 sec

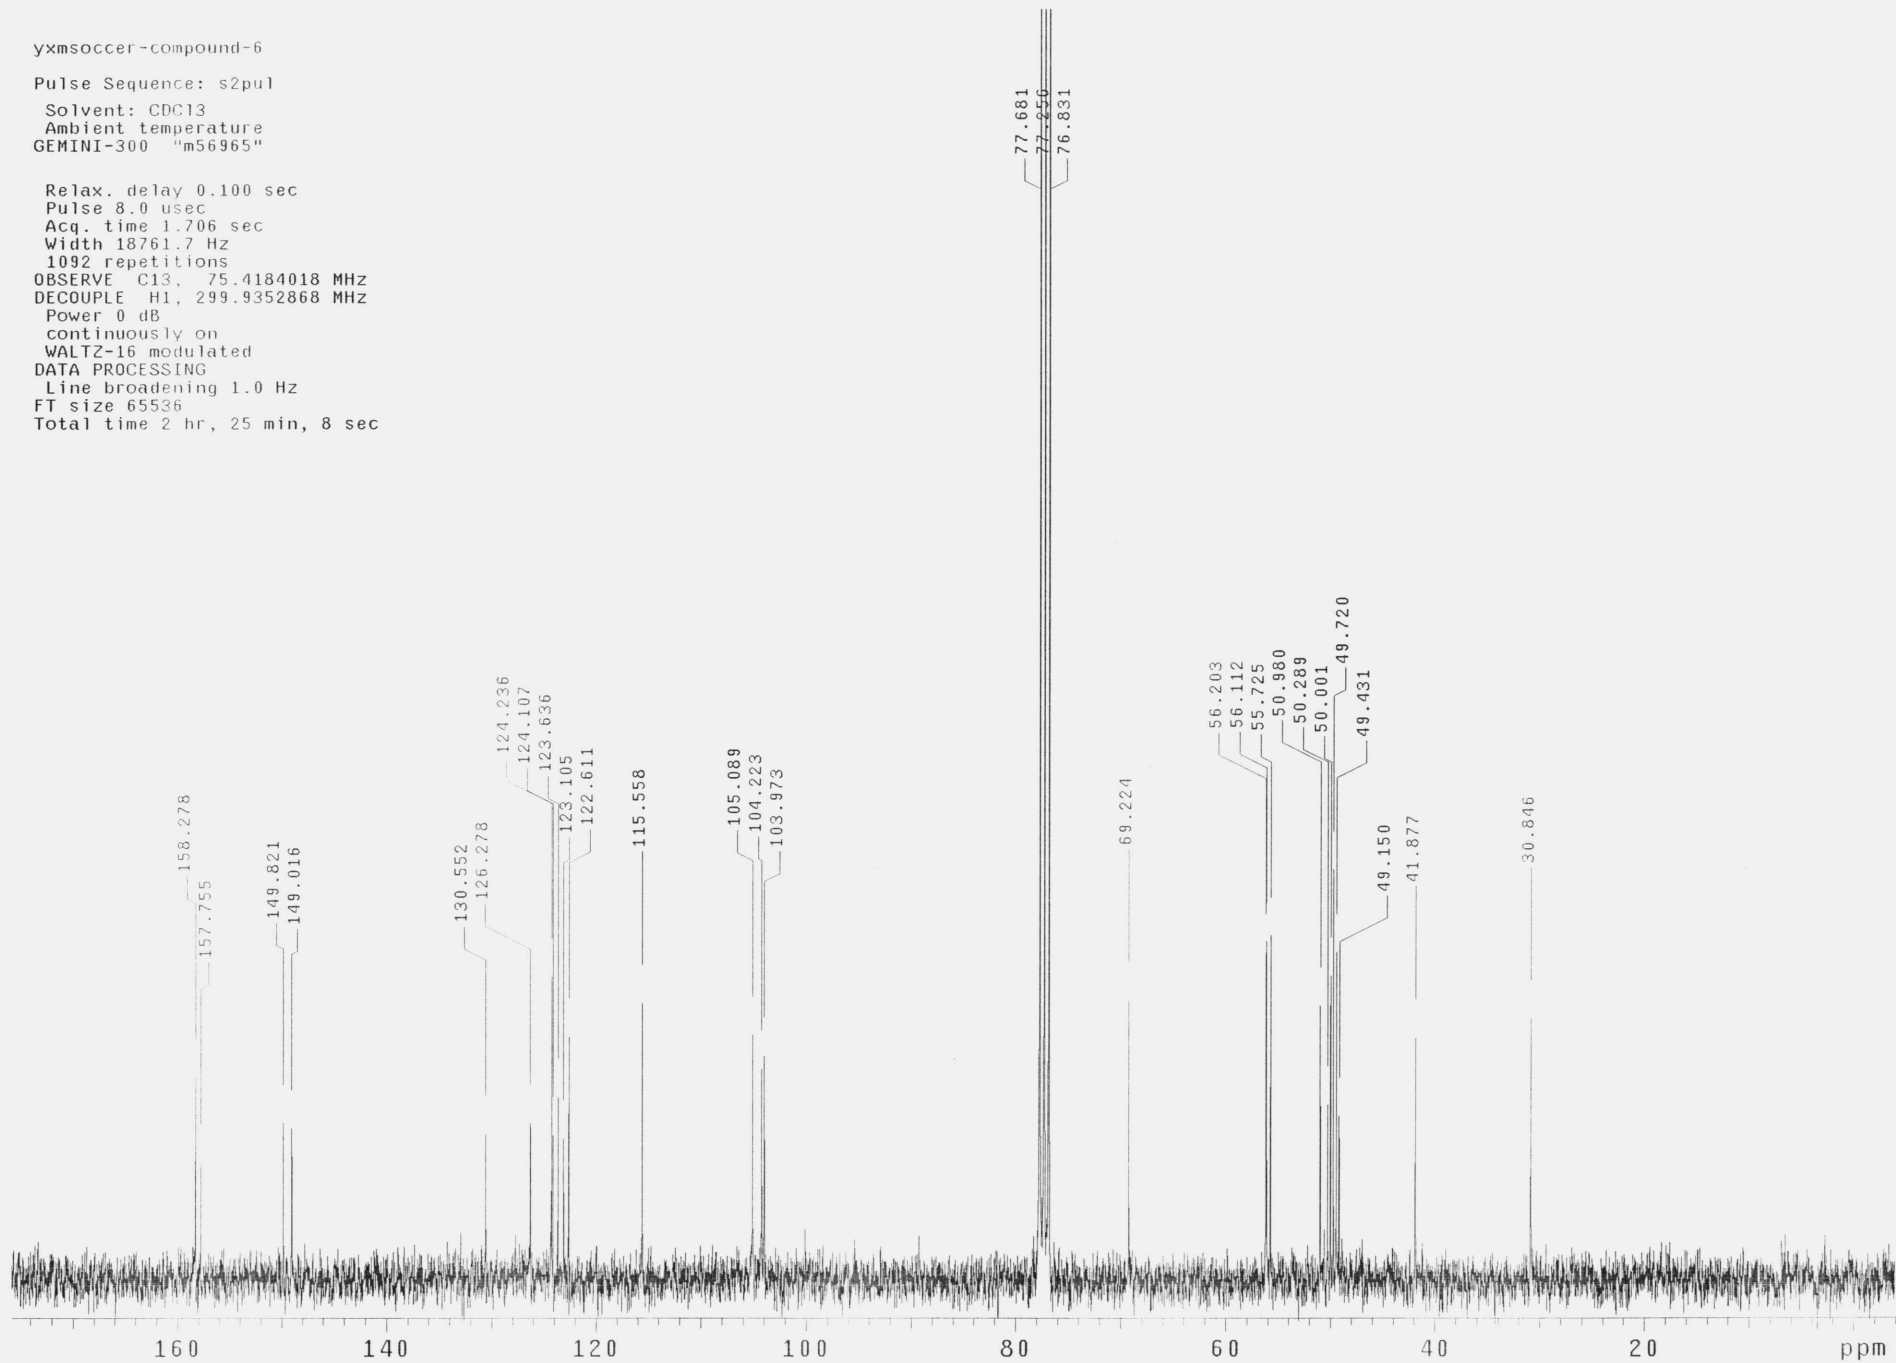



yxmsoccer-anto-ser-deprotected *Compound 7*

Pulse Sequence: s2pu1  
Solvent: DMSO  
Ambient temperature  
GEMINI-300 "m56965"  
PULSE SEQUENCE  
Relax. delay 1.000 sec  
Pulse 33.3 degrees  
Acq. time 1.998 sec  
Width 4500.5 Hz  
24 repetitions  
OBSERVE H1, 300.0623158 MHz  
DATA PROCESSING  
FT size 32768  
Total time 0 min, 0 sec

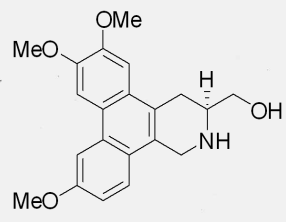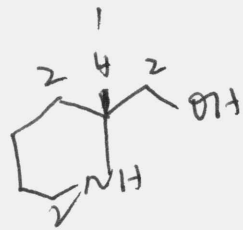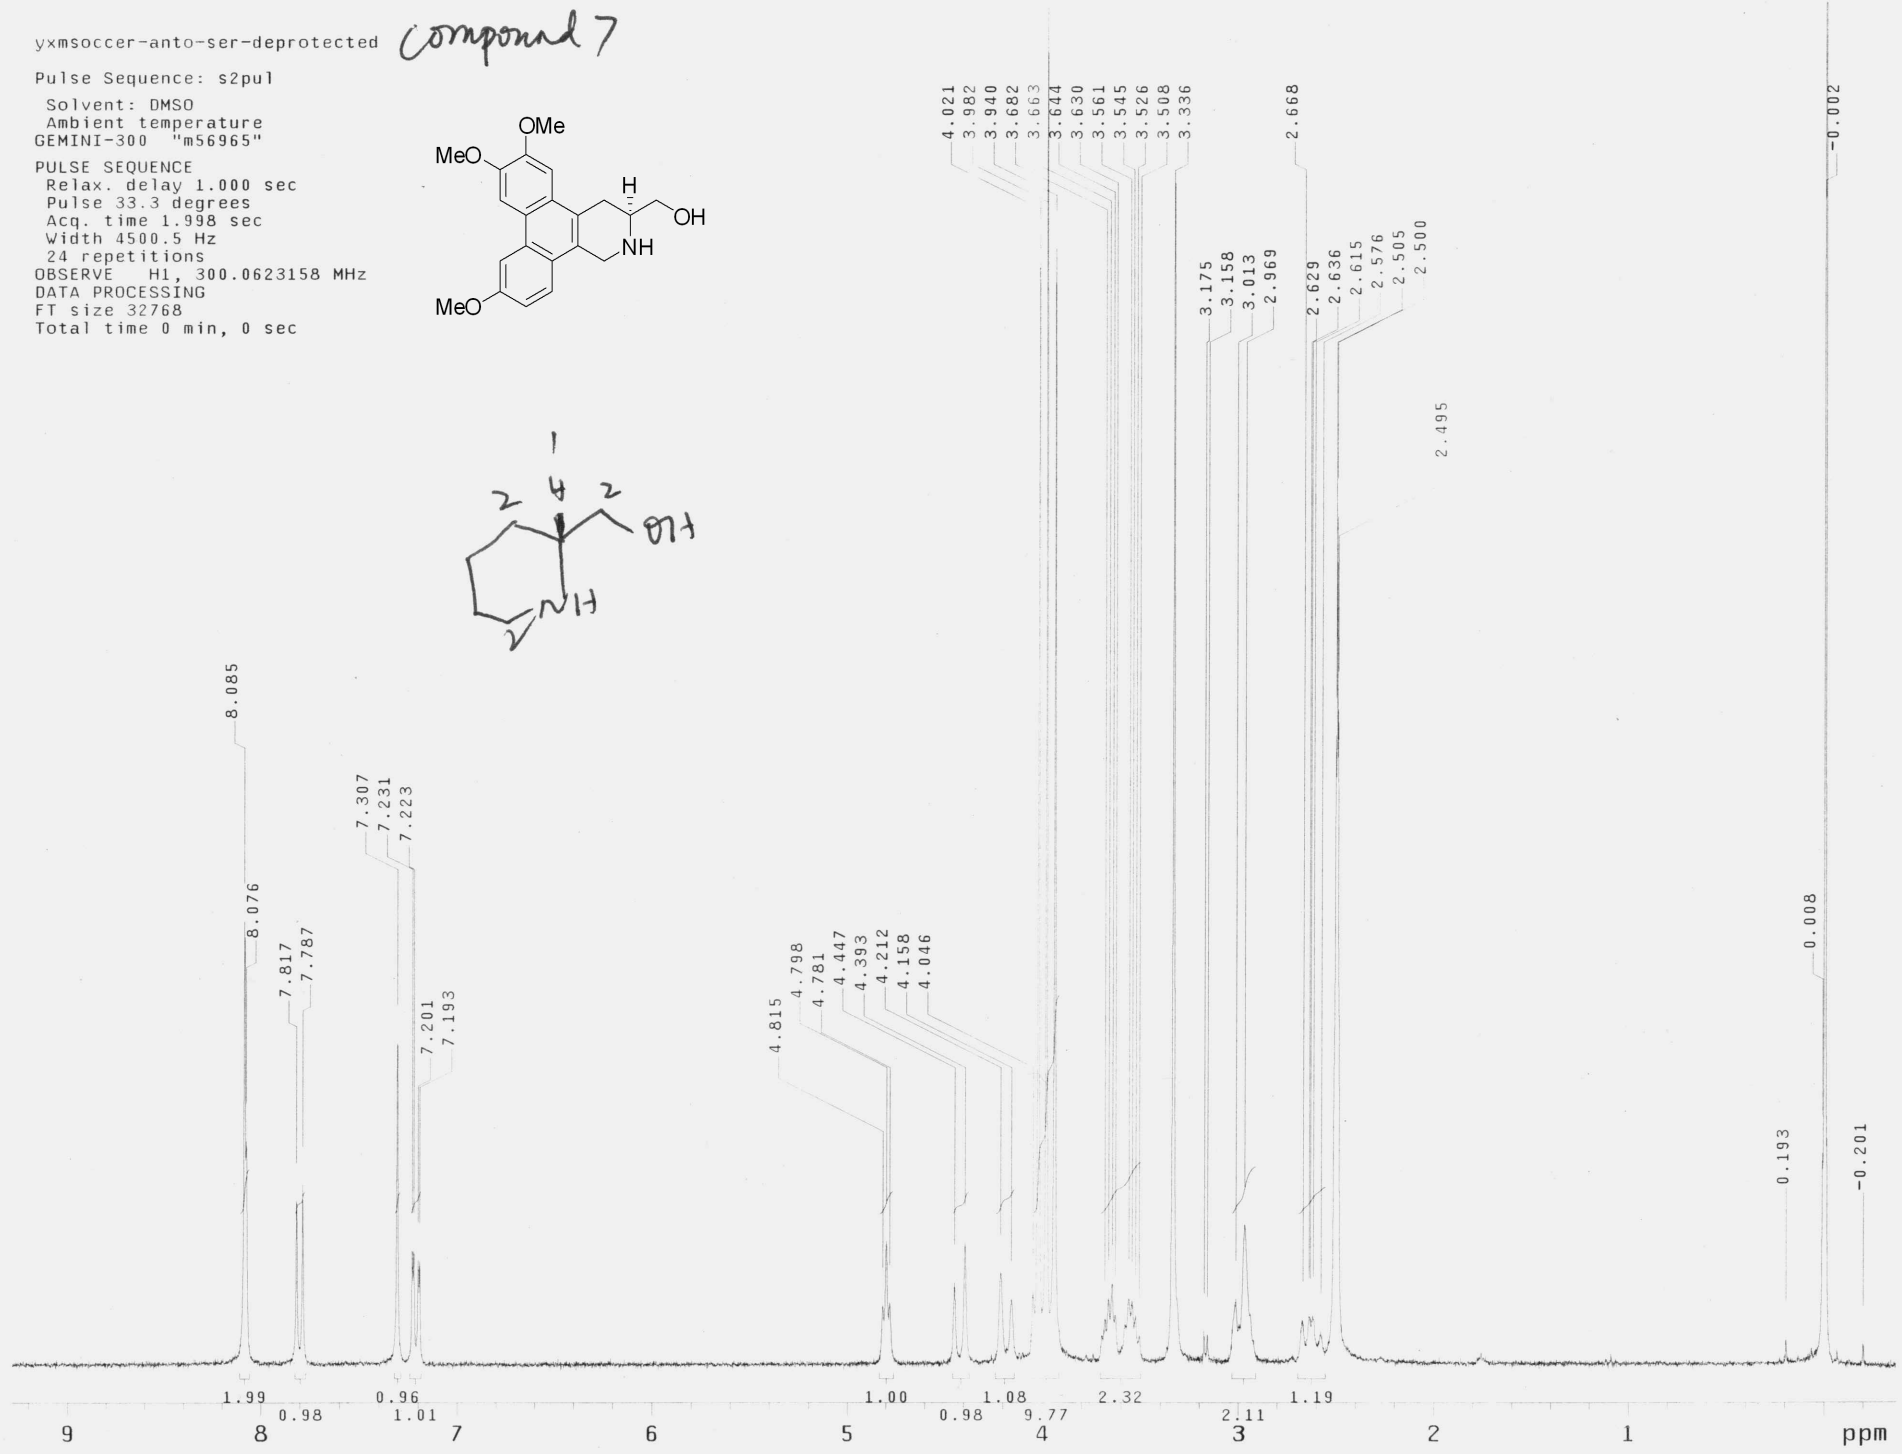

yxmsoccer-compound-7

Pulse Sequence: s2pu1

Solvent: DMSO  
Ambient temperature  
GEMINI-300 "m56965"

Relax. delay 0.100 sec  
Pulse 8.0 usec  
Acq. time 1.706 sec  
Width 18761.7 Hz  
5268 repetitions  
OBSERVE C13, 75.4187600 MHz  
DECOUPLE H1, 299.9367115 MHz  
Power 0 dB  
continuously on  
WALTZ-16 modulated  
DATA PROCESSING  
Line broadening 1.0 Hz  
FT size 65536  
Total time 0 min, 0 sec

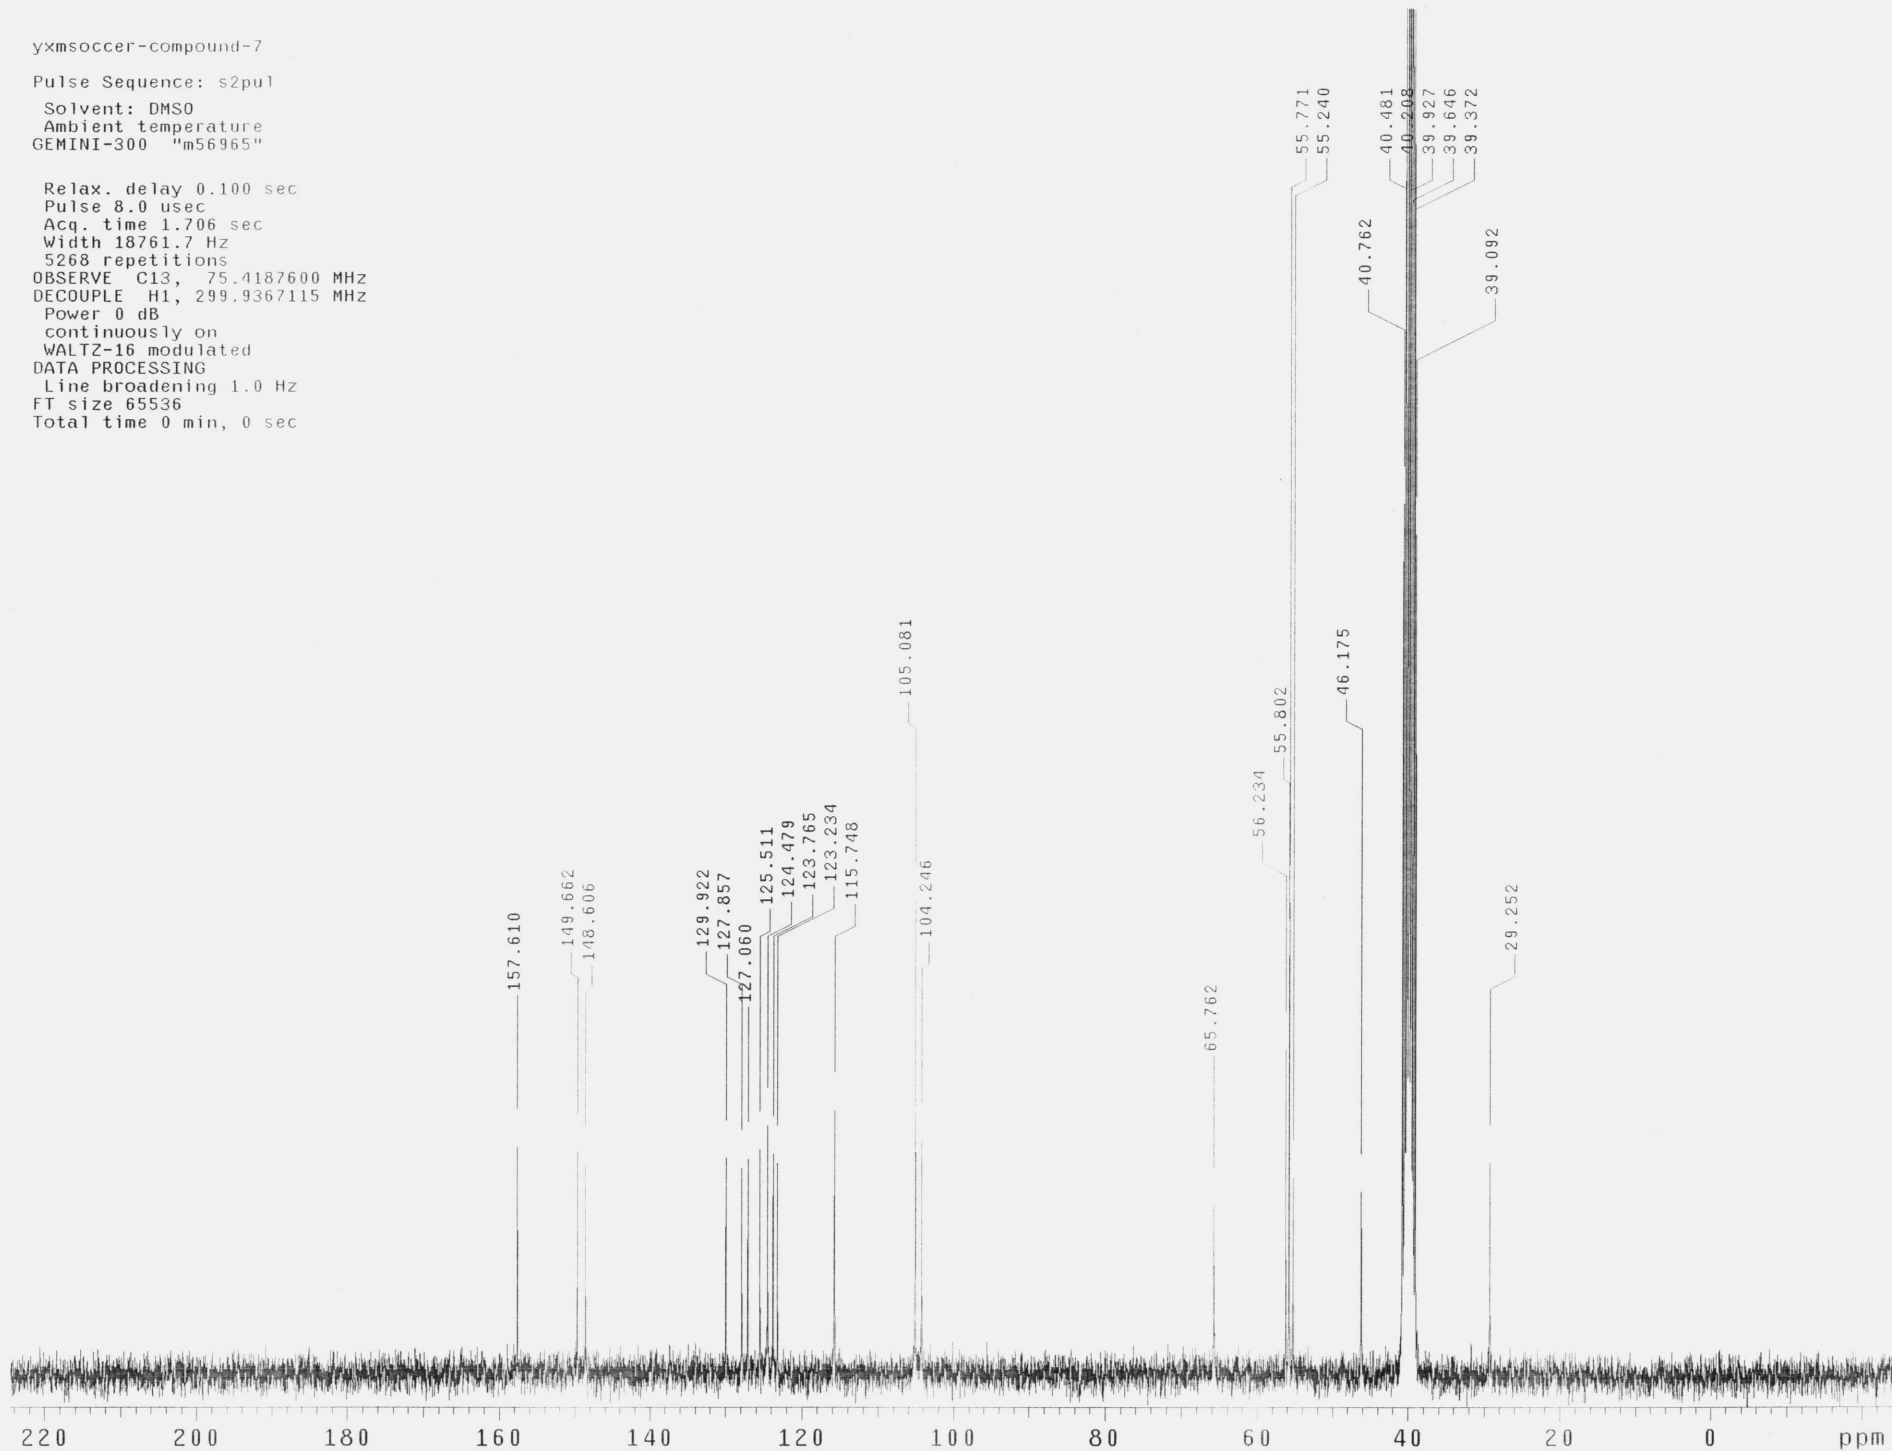

yxmsoccer-compound-8

Pulse Sequence: s2pu1

Solvent: CDC13  
Ambient temperature  
GEMINI-300 "m56965"

Relax. delay 1.000 sec  
Pulse 7.0 usec  
Acq. time 1.998 sec  
Width 4500.5 Hz  
24 repetitions  
OBSERVE H1, 299.9337848 MHz  
DATA PROCESSING  
FT size 32768  
Total time 1 min, 20 sec

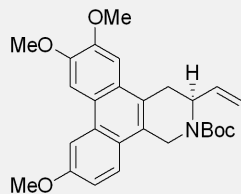

compound 9

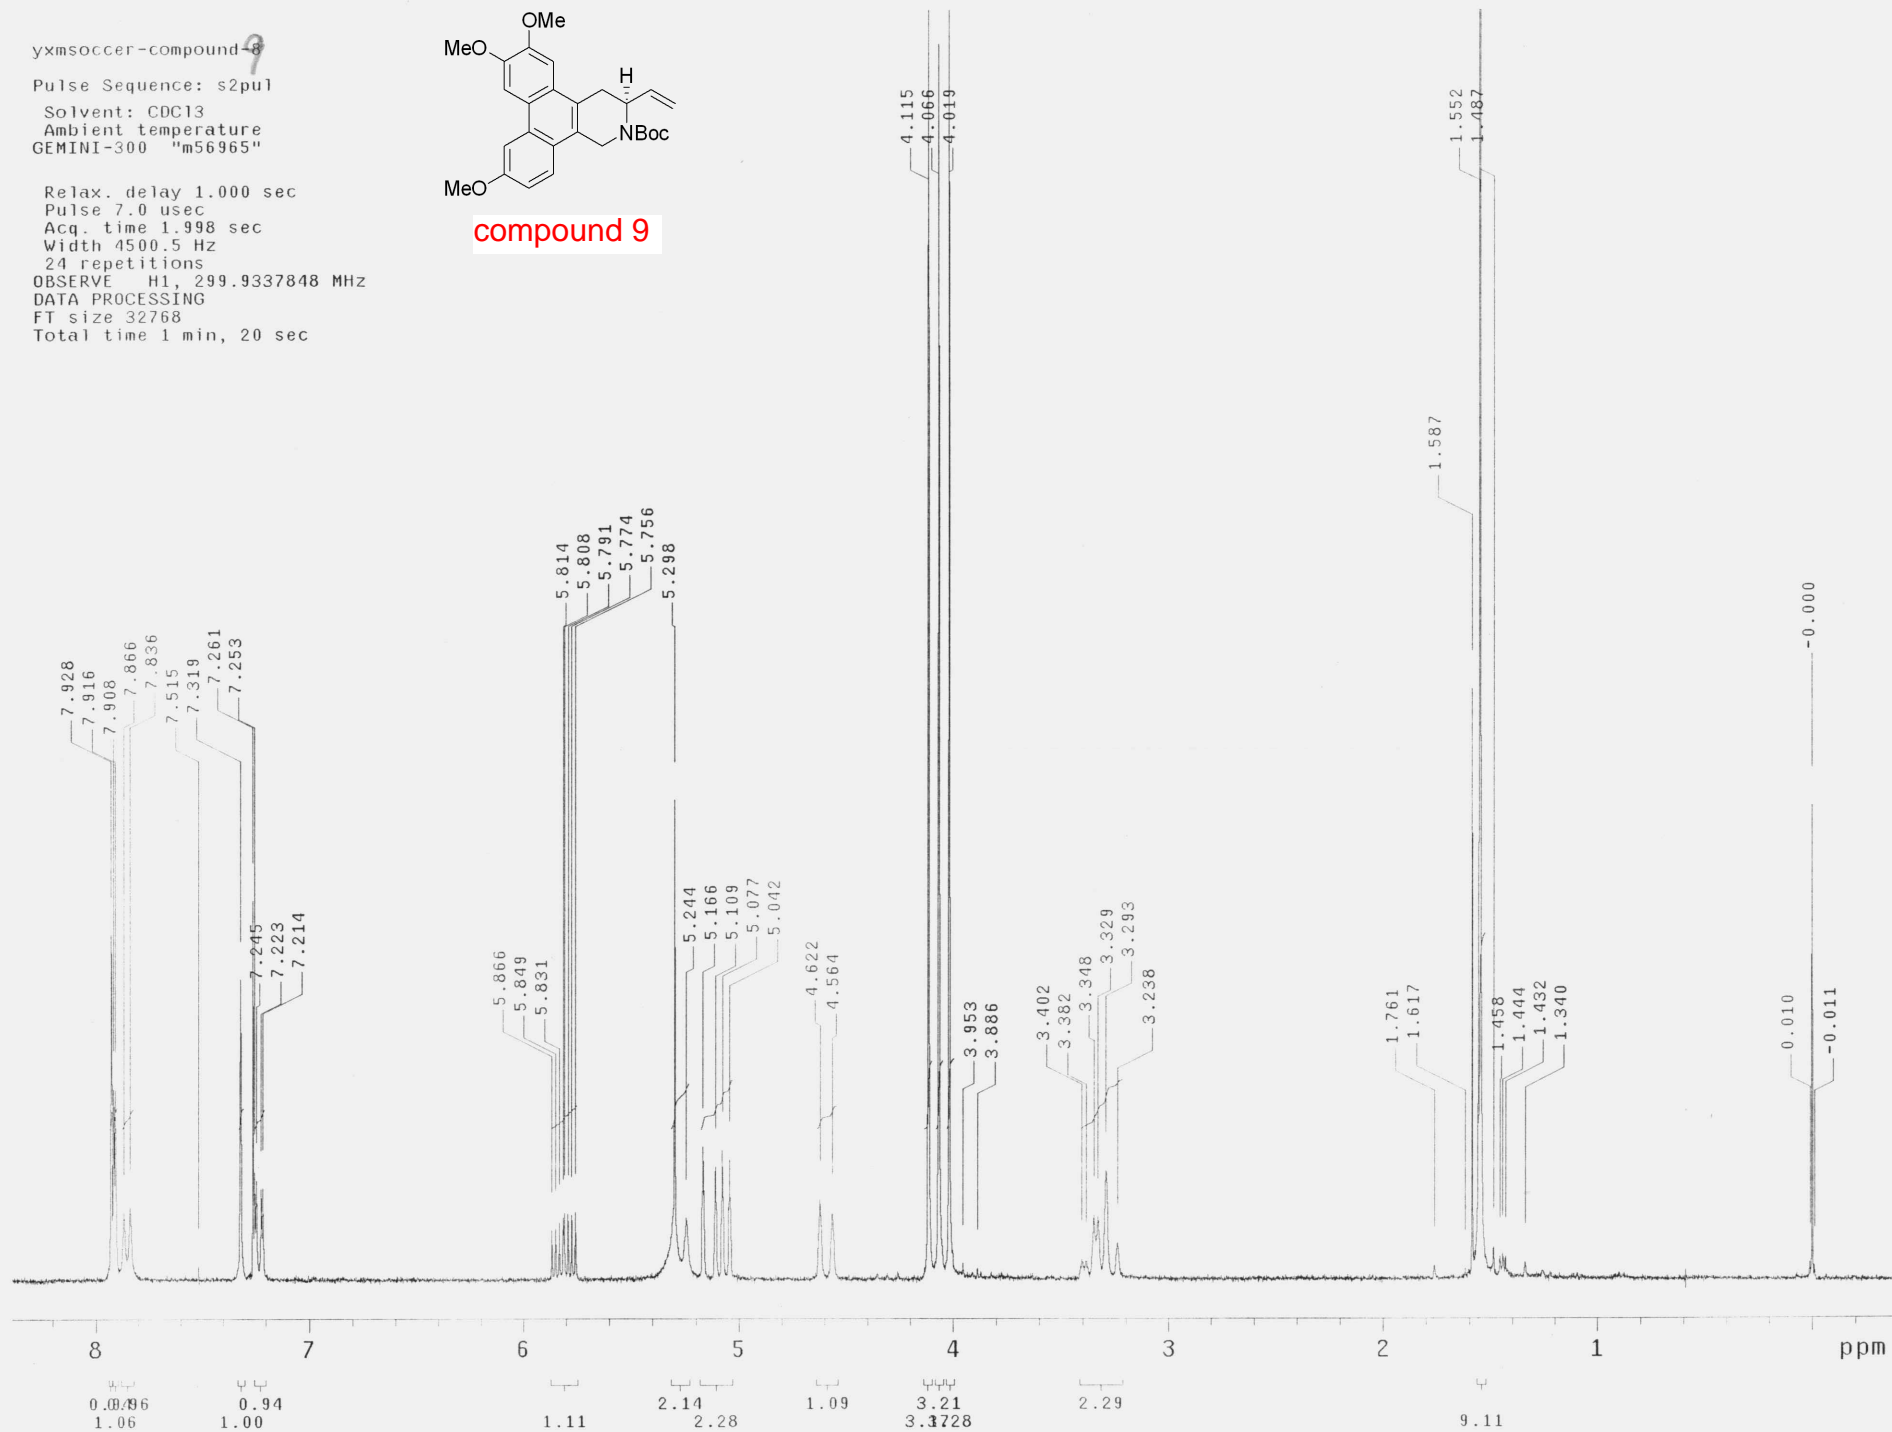

yxmsoccer-compound-9

Pulse Sequence: s2pu1

Solvent: CDC13  
Ambient temperature  
GEMINI-300 "m56965"

Relax. delay 0.100 sec  
Pulse 8.0 usec  
Acq. time 1.706 sec  
Width 18761.7 Hz  
12000 repetitions  
OBSERVE C13, 75.4184009 MHz  
DECOUPLE H1, 299.9352868 MHz  
Power 0 dB  
continuously on  
WALTZ-16 modulated  
DATA PROCESSING  
Line broadening 1.0 Hz  
FT size 65536  
Total time 0 min, 0 sec

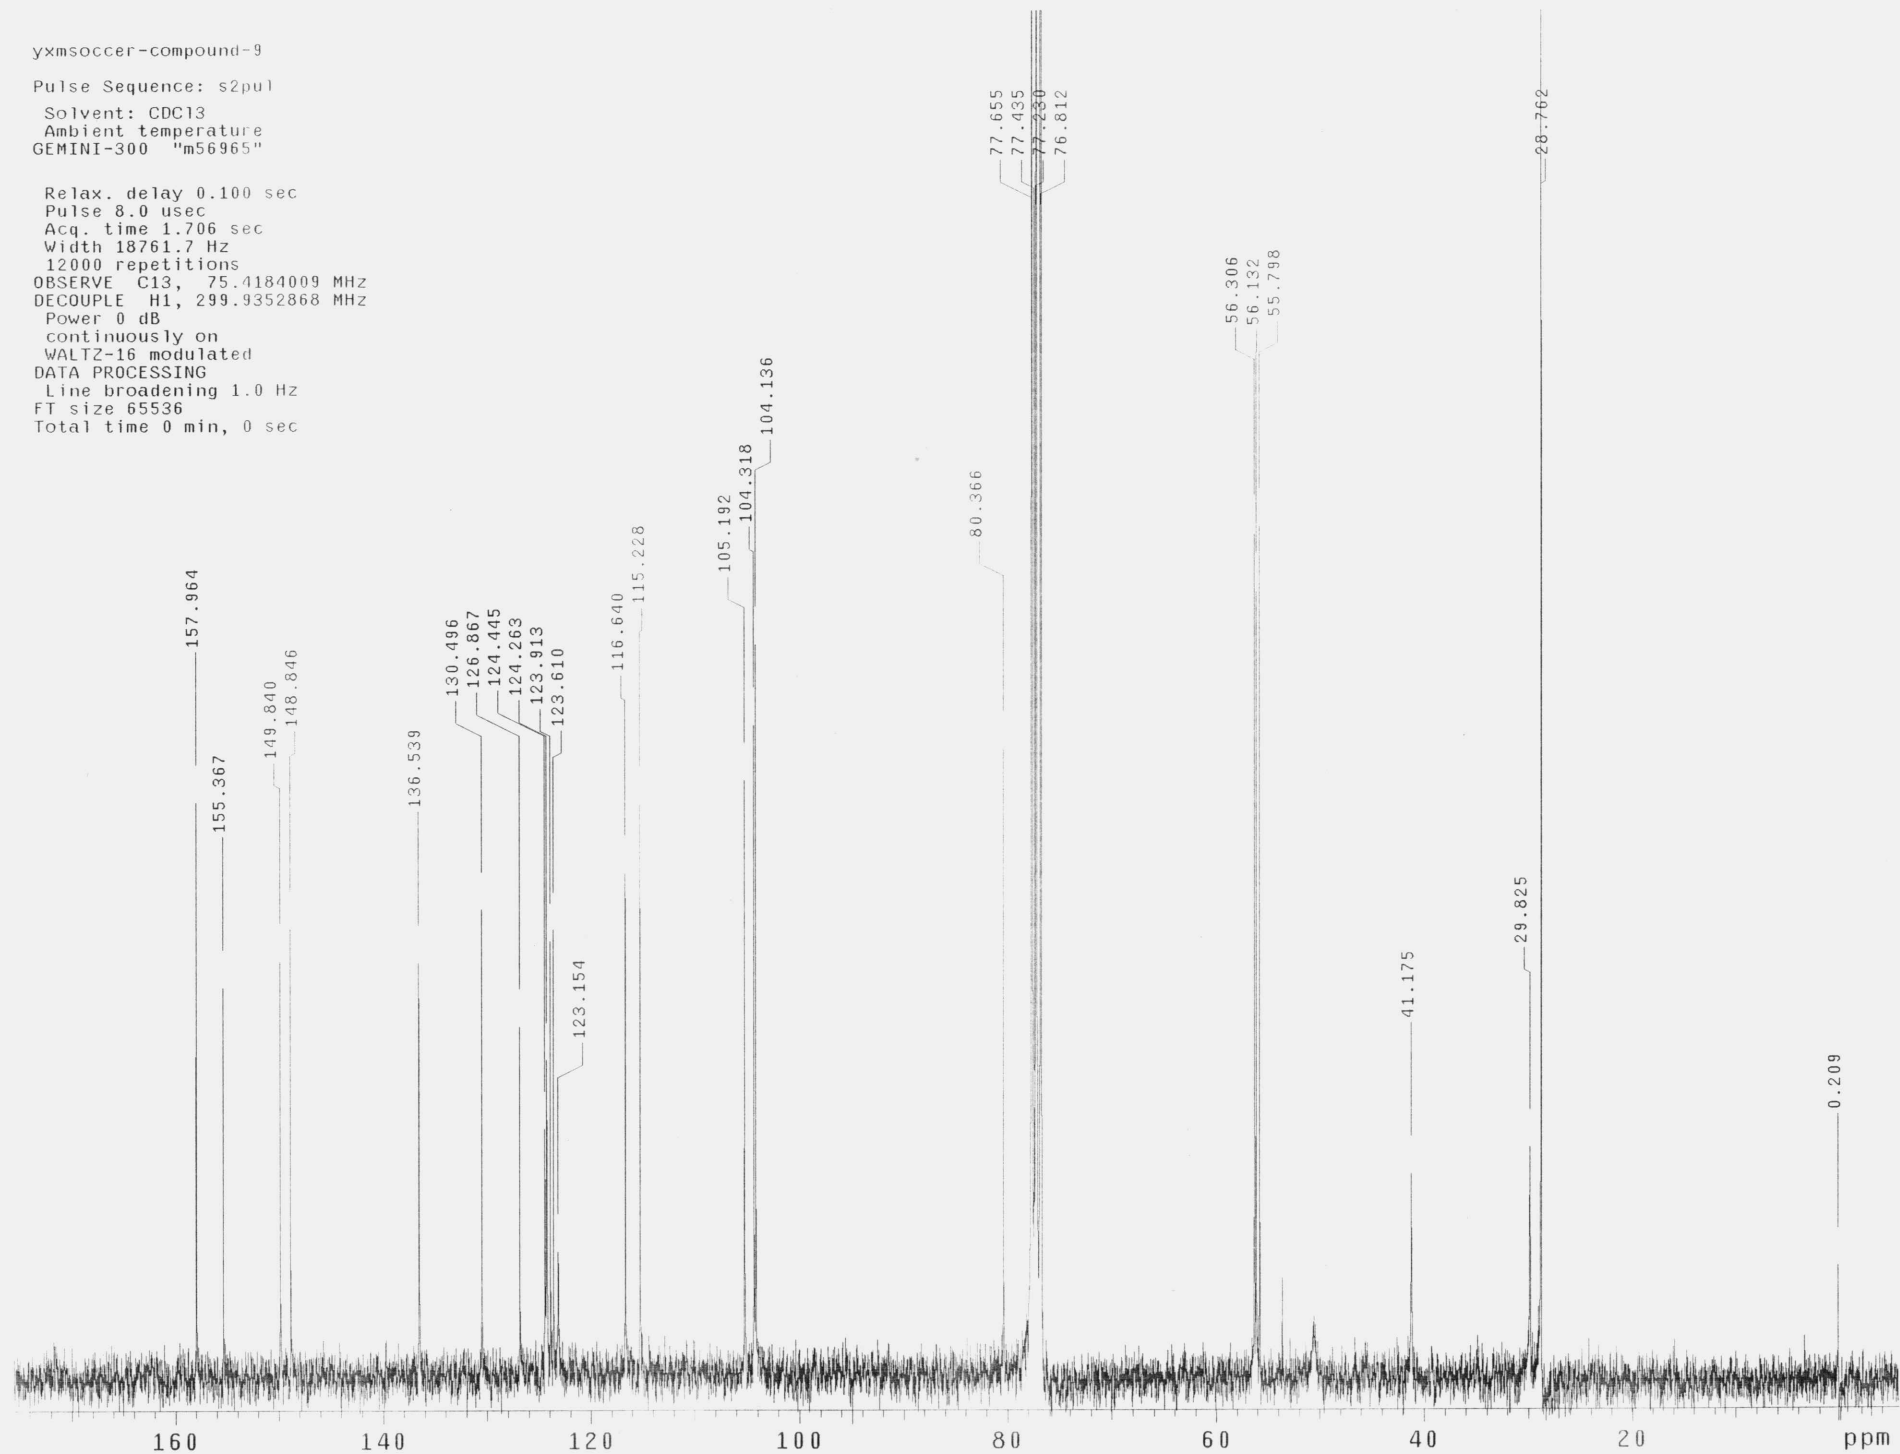

Supplement: NIHMS184742-supplement-1_si_001.pdf [file NIHMS184742-supplement-1_si_001.pdf]
