# Supplementary material
Source: PubMed Central journal article supplement (PMC2849728)

## Supporting information

### Antitumor Agents 274. A New Synthetic Strategy for E-ring SAR Study of Antofine and Cryptopleurine Analogs

Xiaoming Yang,<sup>†</sup> Qian Shi,<sup>†,\*</sup> Kenneth F. Bastow,<sup>‡</sup> and Kuo-Hsiung Lee<sup>†,\*</sup>

<sup>†</sup>*Natural Products Research Laboratories and* <sup>‡</sup>*Division of Medicinal Chemistry and  
Natural Products, Eshelman School of Pharmacy, University of North Carolina,  
Chapel Hill, NC 27599-7568, USA*

\* To whom correspondence should be addressed. QS. Phone: 919-843-6325. Fax: 919-966-3893. E-mail: [qshi1@email.unc.edu](mailto:qshi1@email.unc.edu); KHL. Phone: 919-962-0066. Fax: 919-966-3893. E-mail: [khlee@unc.edu](mailto:khlee@unc.edu)

#### Contents

|                                                                                |        |
|--------------------------------------------------------------------------------|--------|
| <sup>1</sup> H NMR and <sup>13</sup> C NMR spectra of compound <b>15-16</b>    | S33-36 |
| <sup>1</sup> H NMR and <sup>13</sup> C NMR spectra of compound <b>13 (a-c)</b> | S37-42 |
| <sup>1</sup> H NMR and <sup>13</sup> C NMR spectra of compound <b>17</b>       | S43-44 |
| <sup>1</sup> H NMR and <sup>13</sup> C NMR spectra of compound <b>18</b>       | S45-46 |

yxm-J0C-15

File: Proton

Pulse Sequence: s2pu1

Solvent: cdc13  
Temp. 26.0 C / 299.1 K  
Operator: xiaoming  
INOVA-400 "kerr-inova400.pha.unc.edu"

Relax. delay 1.000 sec  
Pulse 45.0 degrees  
Acq. time 2.049 sec  
Width 4798.5 Hz  
16 repetitions  
OBSERVE H1, 399.8639779 MHz  
DATA PROCESSING  
Line broadening 0.2 Hz  
FT size 65536  
Total time 0 min, 55 sec

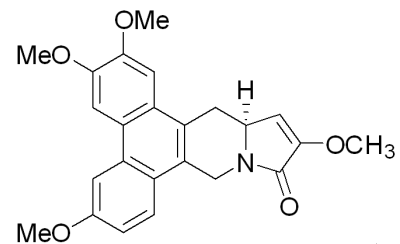

Compound 15

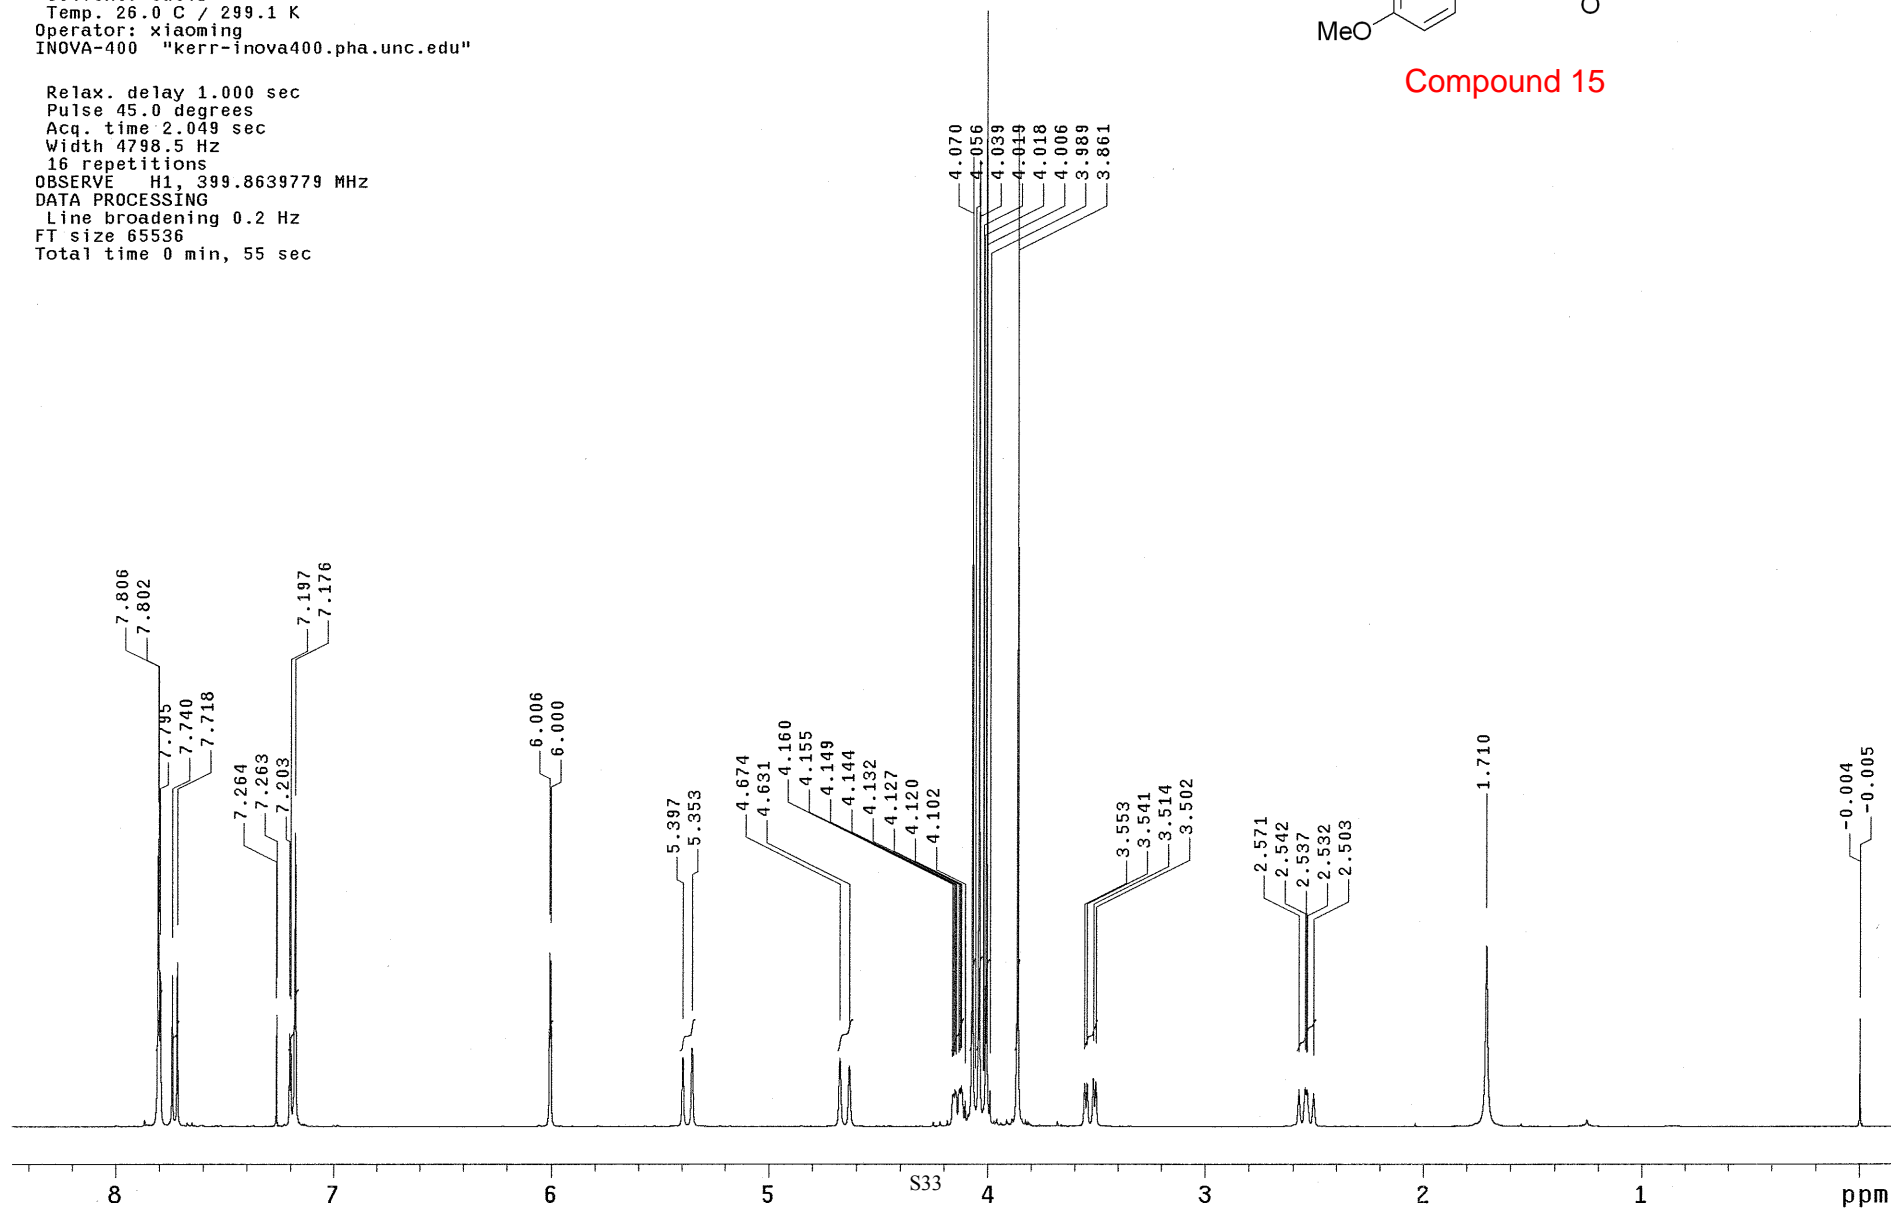

yxm-J0C-15-carbon

File: Carbon

Pulse Sequence: s2pu1

Solvent: cdc13  
Temp. 26.0 C / 299.1 K  
Operator: xiaoming  
INOVA-400 "kerr-inova400.pha.unc.edu"

Relax. delay 1.000 sec  
Pulse 45.0 degrees  
Acq. time 1.300 sec  
Width 24132.7 Hz  
1292 repetitions  
OBSERVE C13, 100.5458592 MHz  
DECOUPLE H1, 399.8659917 MHz  
Power 32 dB  
continuously on  
WALTZ-16 modulated  
DATA PROCESSING  
Line broadening 0.5 Hz  
FT size 65536  
Total time 3 hr, 12 min, 26 sec

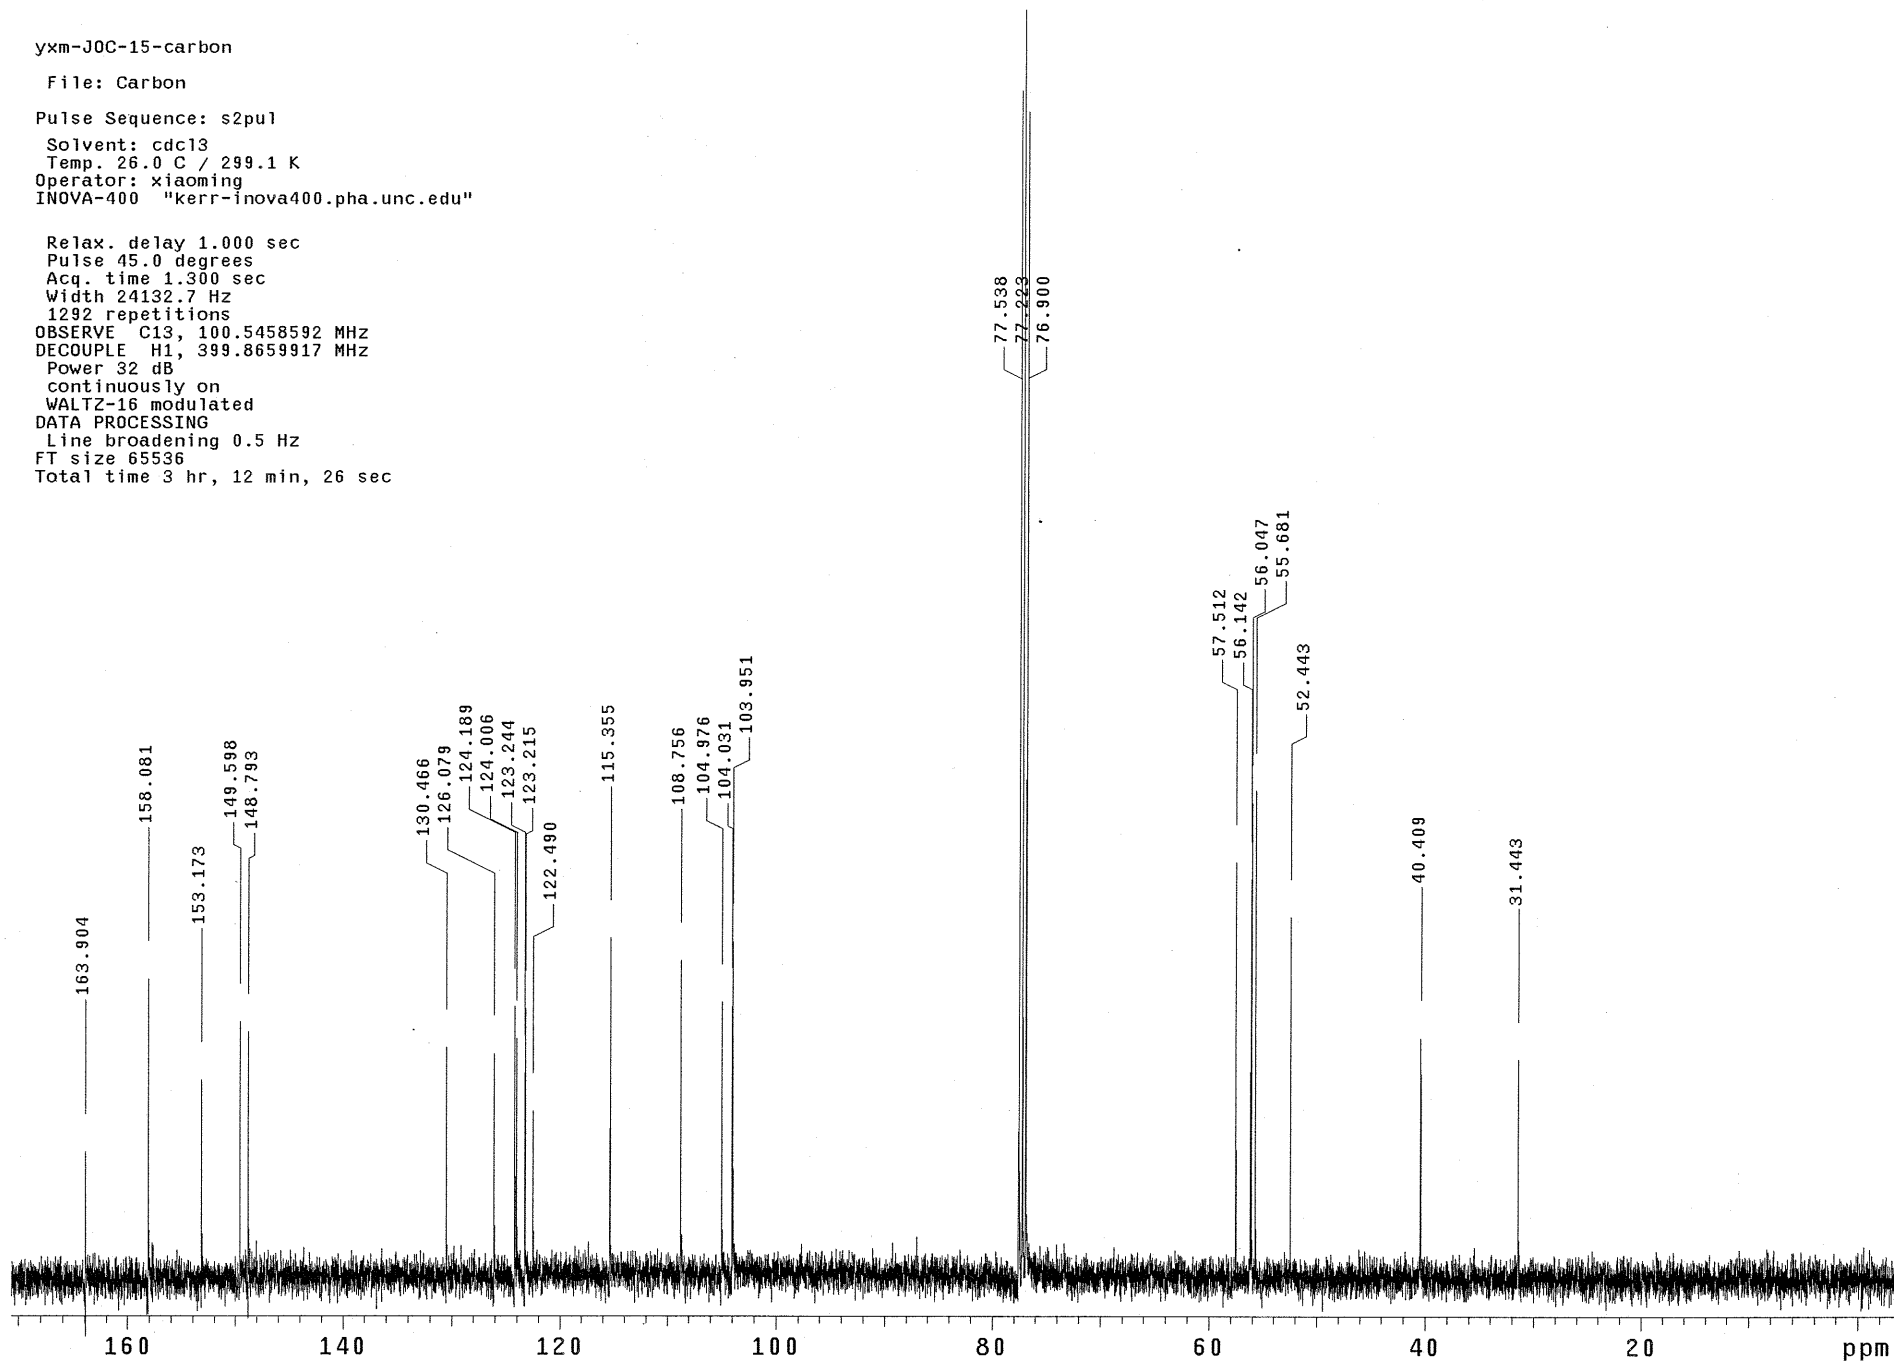

yxm-J0C-16

File: Proton

Pulse Sequence: s2pu1

Solvent: cdc13  
Temp. 26.0 C / 299.1 K  
Operator: xiaoming  
INOVA-400 "kerr-inova400.pha.unc.edu"

Relax. delay 1.000 sec  
Pulse 45.0 degrees  
Acq. time 2.049 sec  
Width 4798.5 Hz  
Single scan  
OBSERVE H1, 399.8639792 MHz  
DATA PROCESSING  
Line broadening 0.2 Hz  
FT size 65536  
Total time 0 min, 9 sec

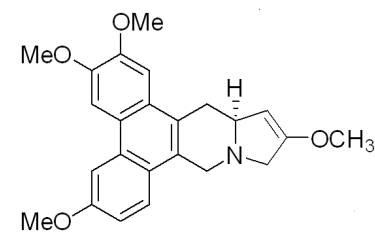

Compound 16

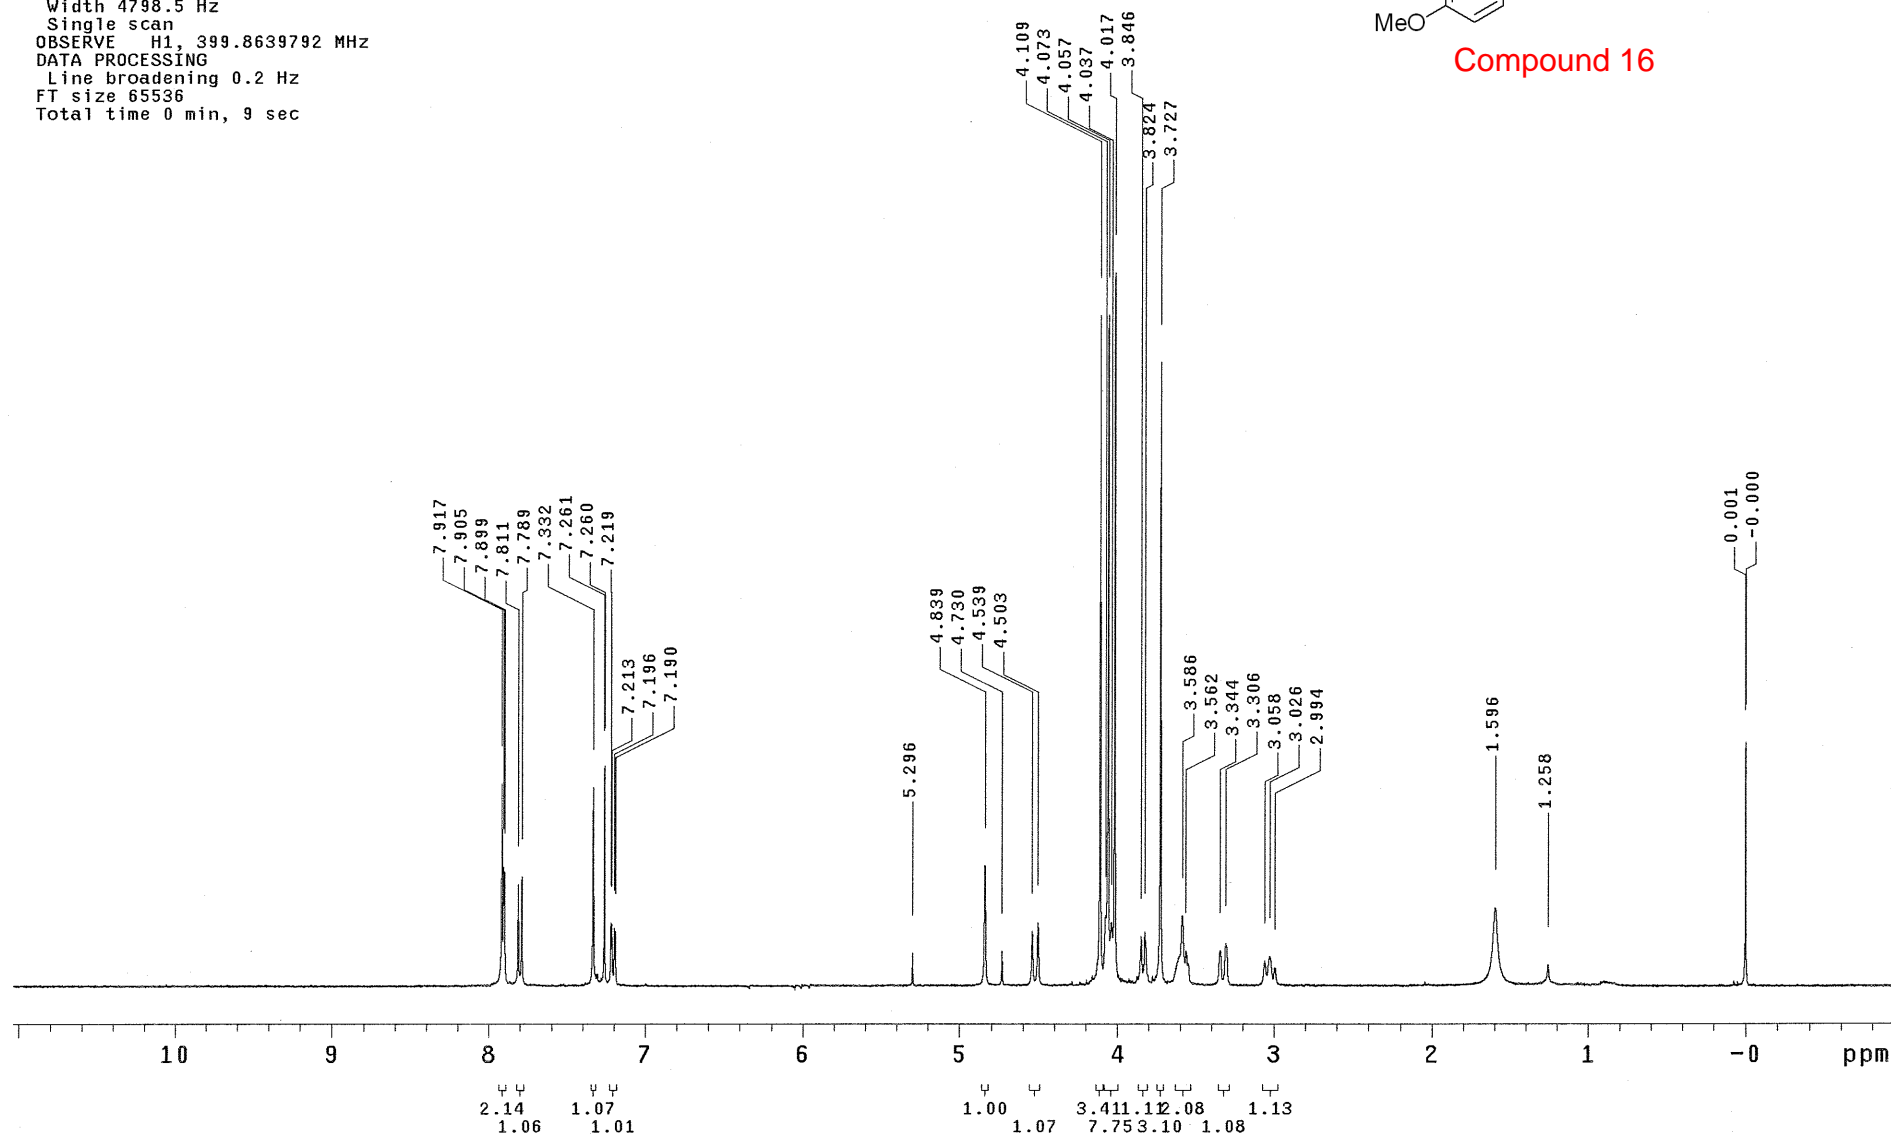

yxm-30C-16-carbon

File: Carbon

Pulse Sequence: s2pu1

Solvent: cdcl3  
Temp. 26.0 C / 299.1 K  
Operator: xiaoming  
INOVA-400 "kerr-inova400.pha.unc.edu"

Relax. delay 1.000 sec  
Pulse 45.0 degrees  
Acq. time 1.300 sec  
Width 24132.7 Hz  
20000 repetitions  
OBSERVE C13, 100.5458540 MHz  
DECOUPLE H1, 399.8659917 MHz  
Power 32 dB  
continuously on  
WALTZ-16 modulated  
DATA PROCESSING  
Line broadening 0.5 Hz  
FT size 65536  
Total time 12 hr, 49 min, 47 sec

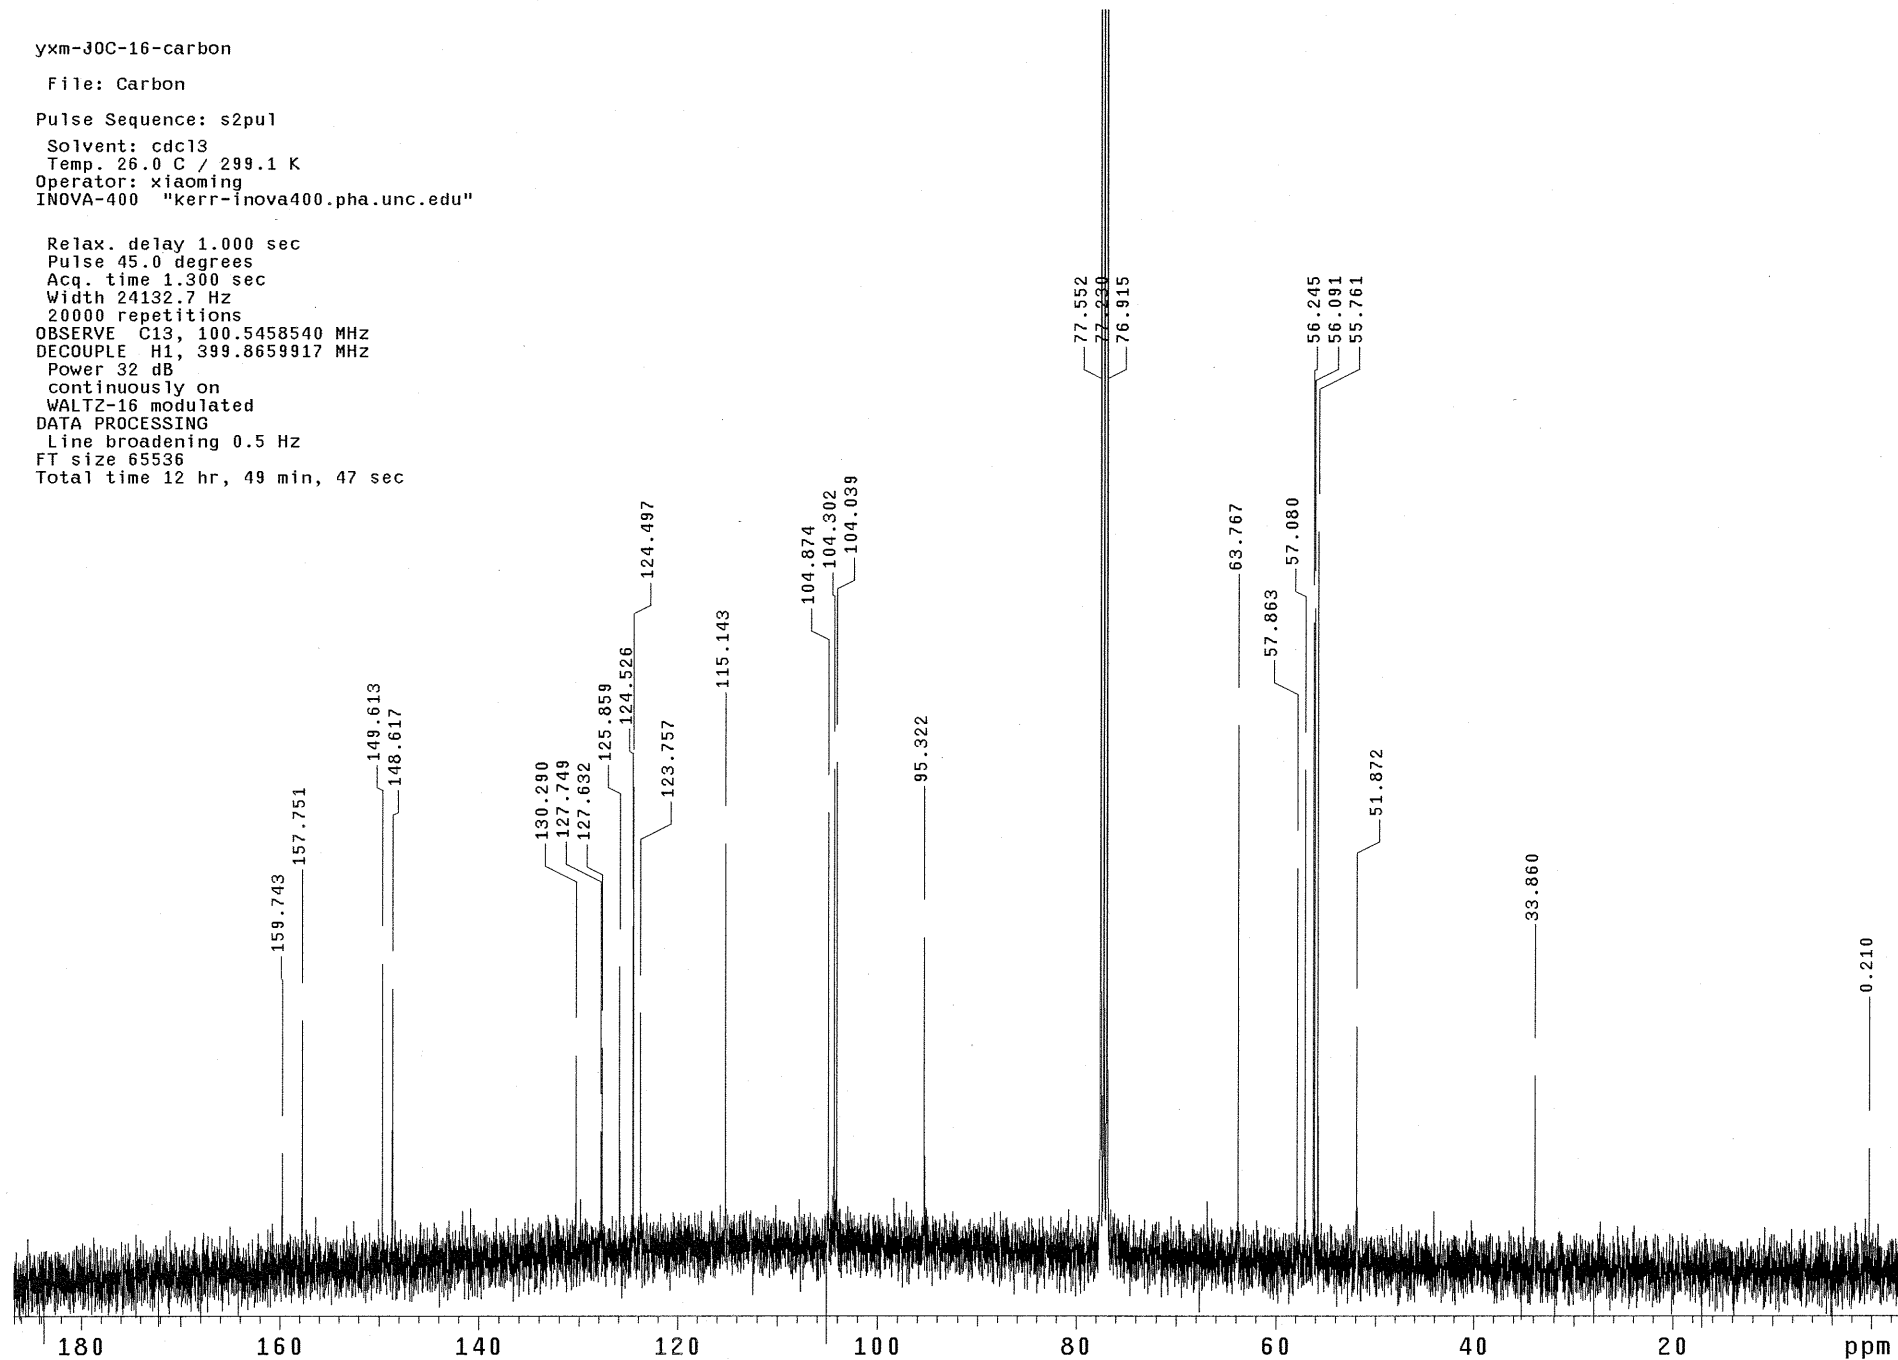

yxmsoccer-R-antofine

Pulse Sequence: s2pu1

yxmsoccer-R-antofine-13a

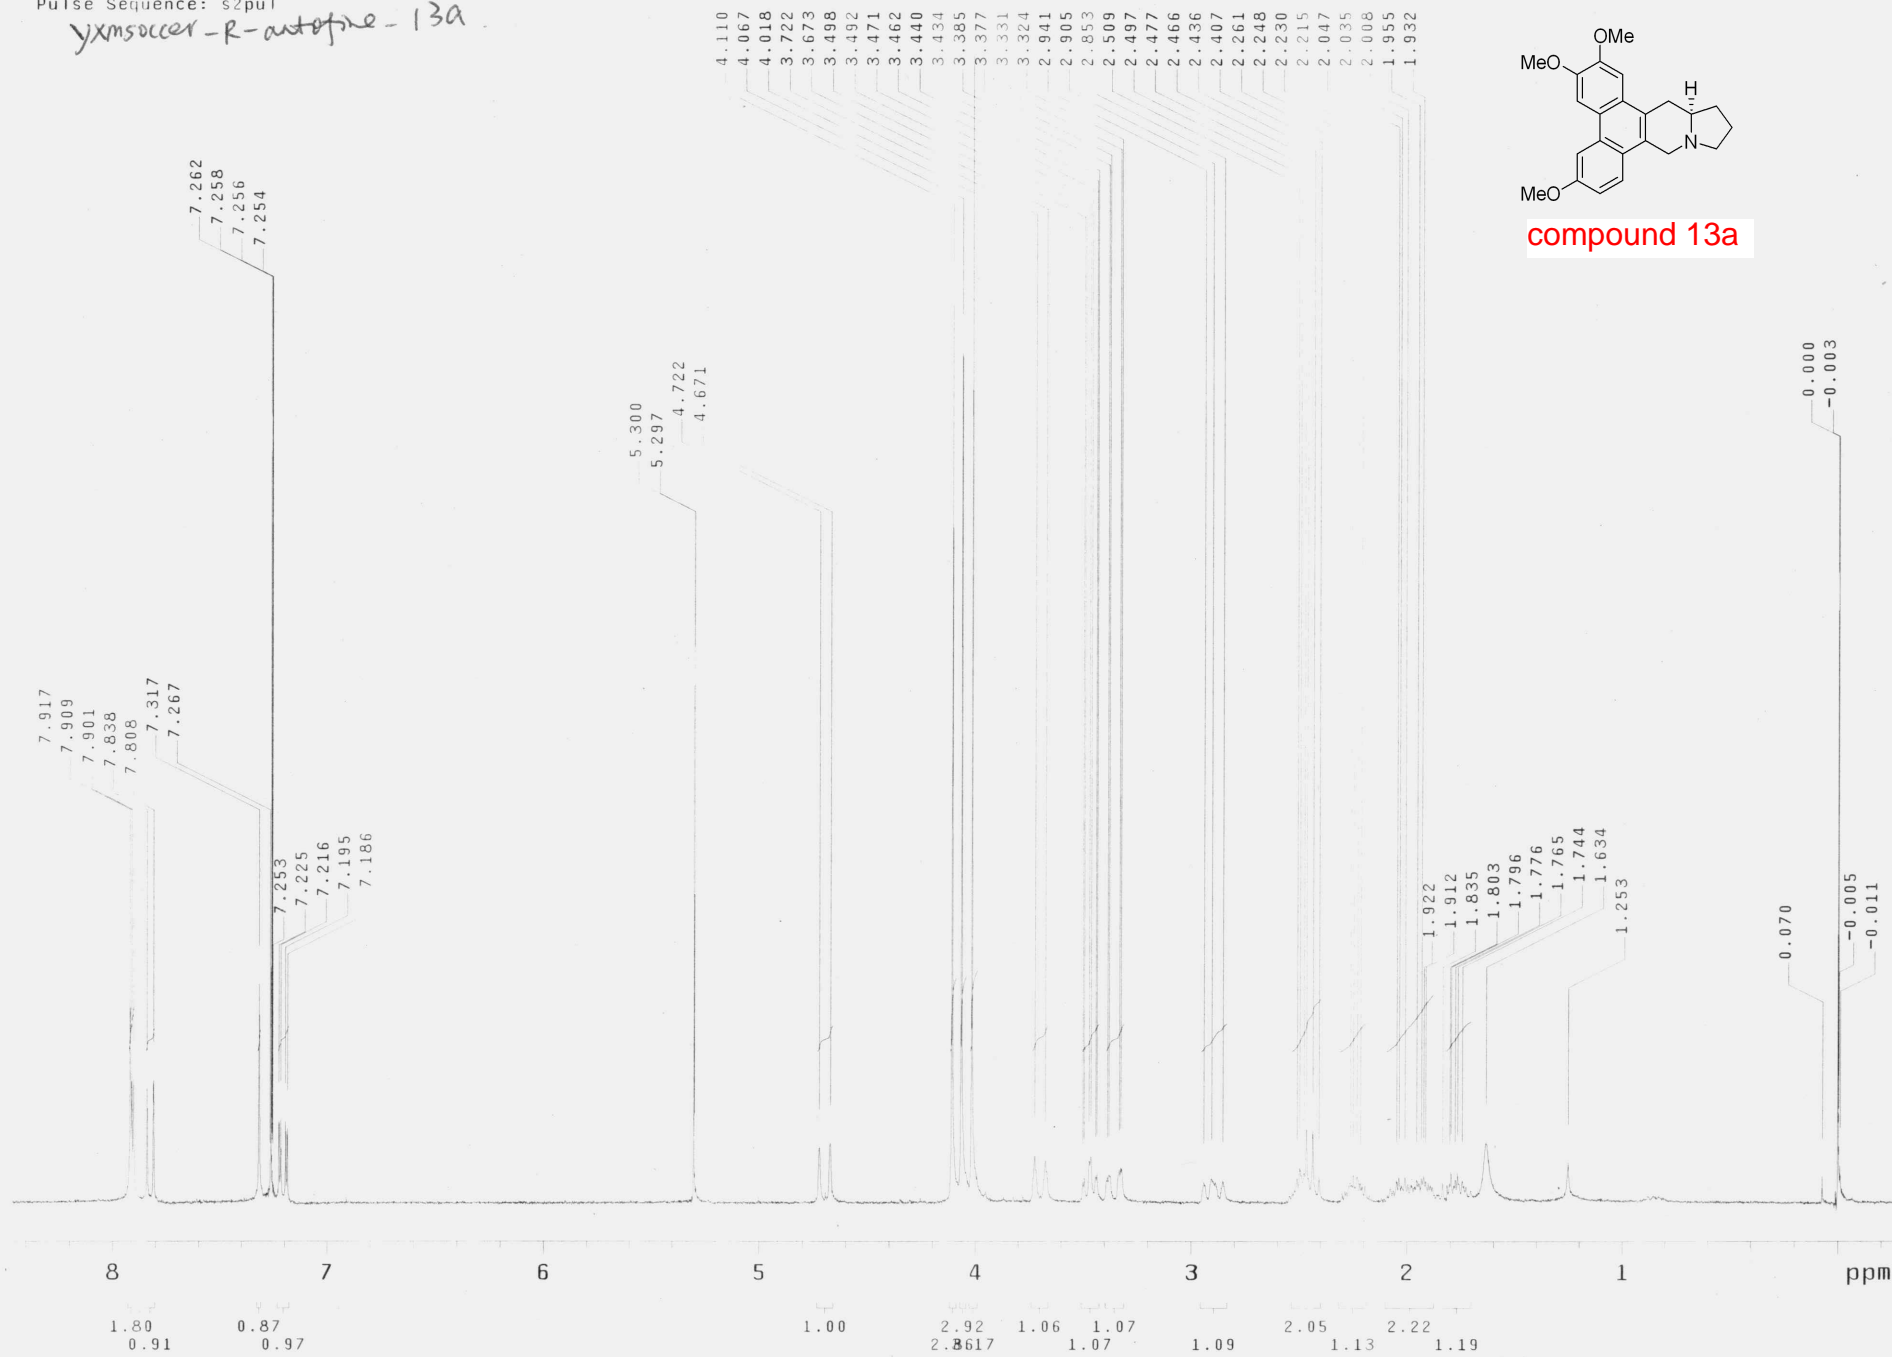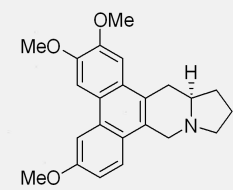

compound 13a

yxmsoccer-compound-13a

Pulse Sequence: s2pul

Solvent: CDC13  
Ambient temperature  
GEMINI-300 "m56965"

Relax. delay 0.100 sec  
Pulse 8.0 usec  
Acq. time 1.706 sec  
Width 18761.7 Hz  
1940 repetitions  
OBSERVE C13, 75.4184026 MHz  
DECOUPLE H1, 299.9352868 MHz  
Power 0 dB  
continuously on  
WALTZ-16 modulated  
DATA PROCESSING  
Line broadening 1.0 Hz  
FT size 65536  
Total time 0 min, 0 sec

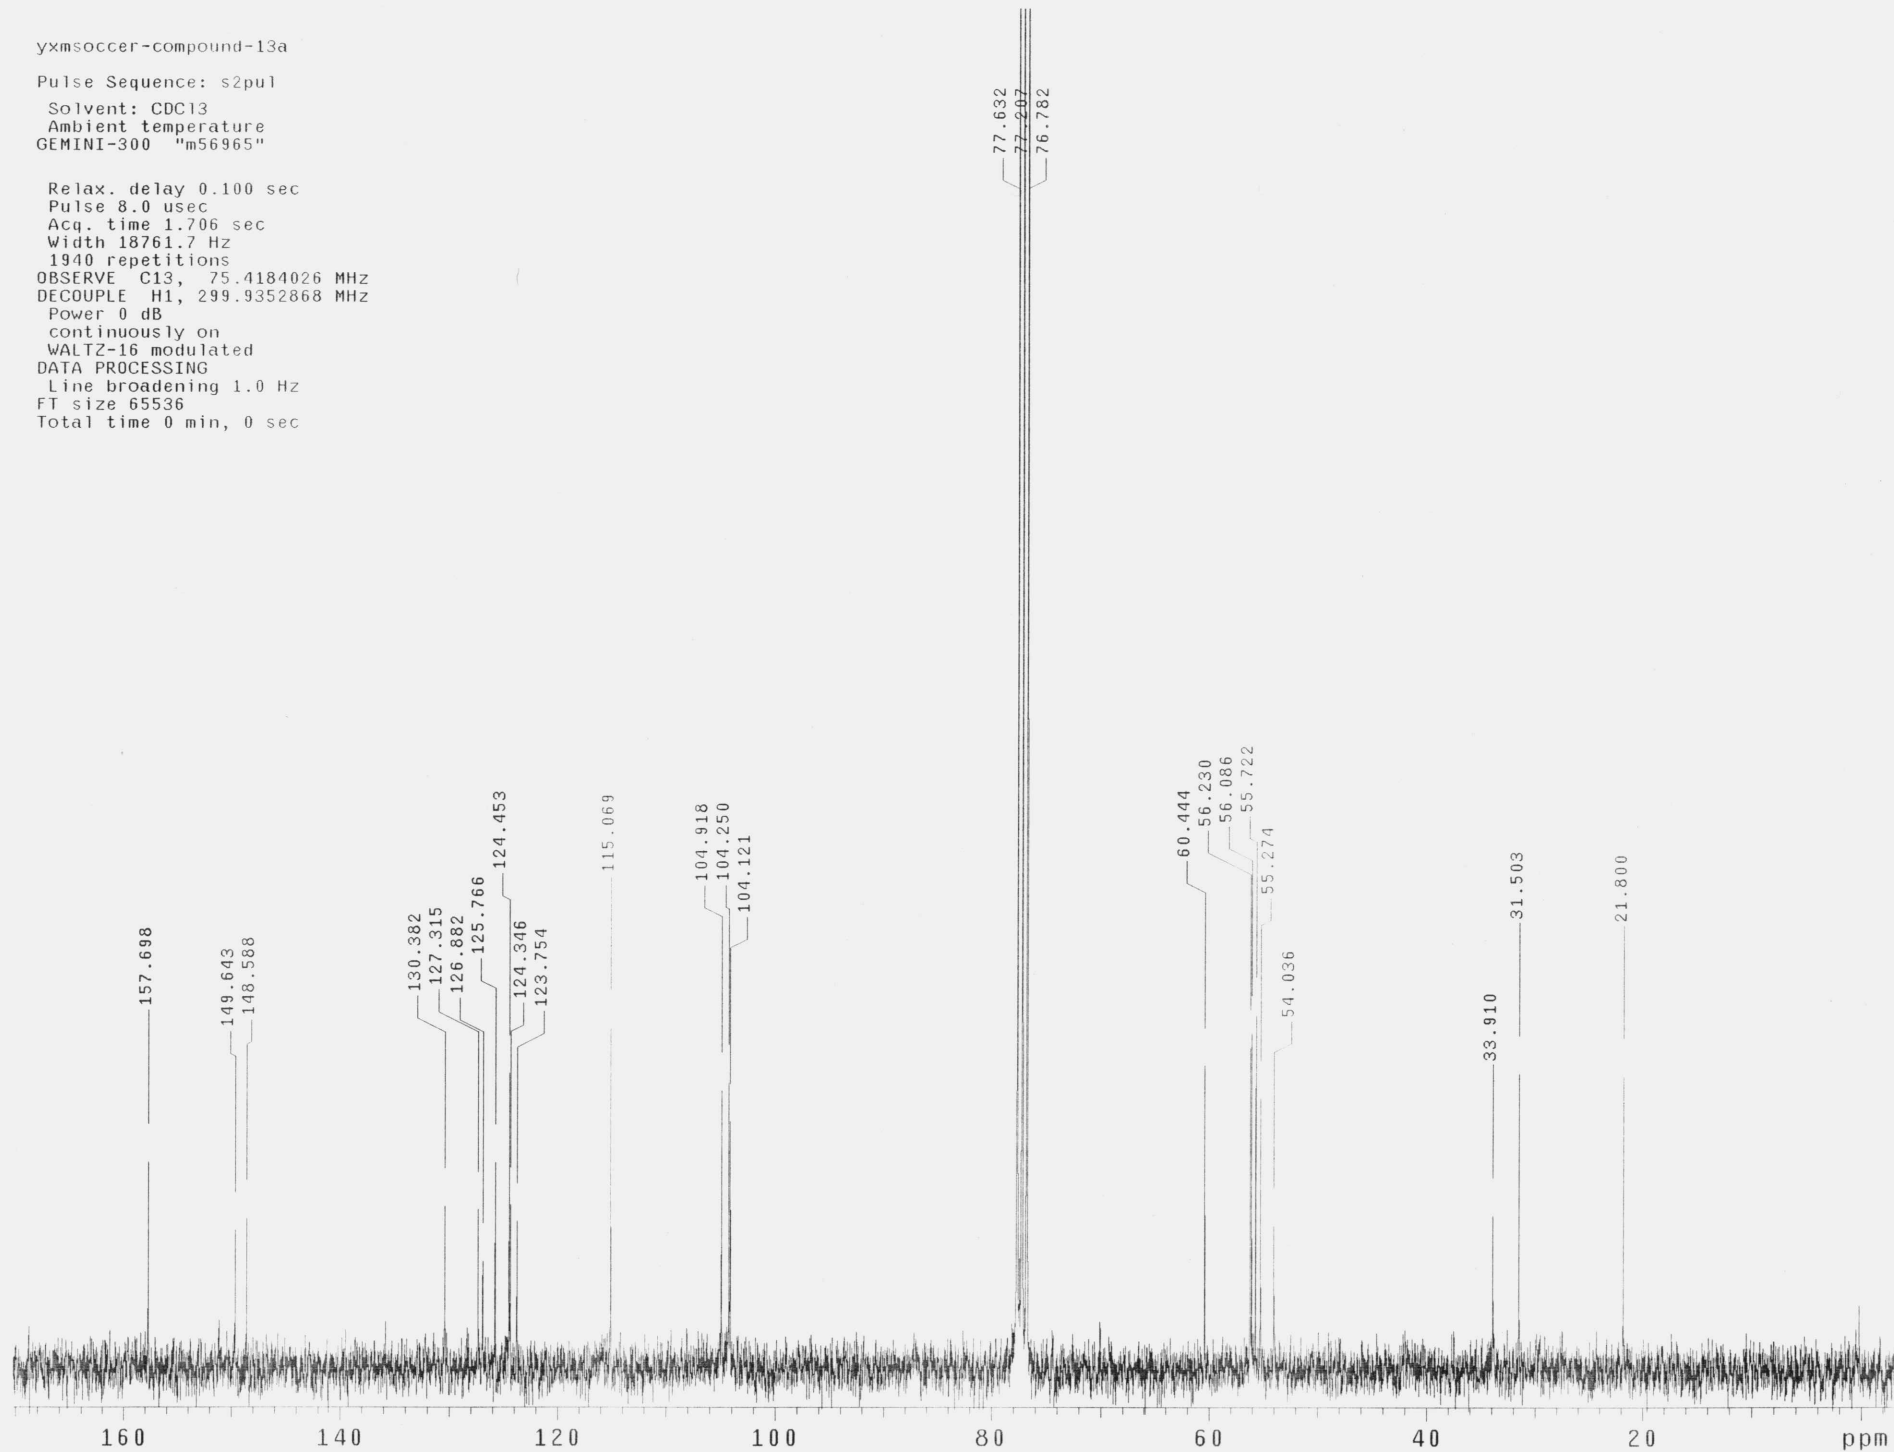

yxmsoccer-compound-13b

Pulse Sequence: s2pu1

Solvent: CDC13  
Ambient temperature  
GEMINI-300 "m56965"

Relax. delay 1.000 sec  
Pulse 7.0 usec  
Acq. time 1.998 sec  
Width 4500.5 Hz  
12 repetitions  
OBSERVE H1, 299.9207414 MHz  
DATA PROCESSING  
FT size 32768  
Total time 0 min, 53 sec

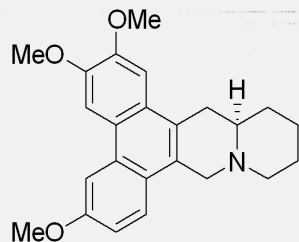

compound 13b

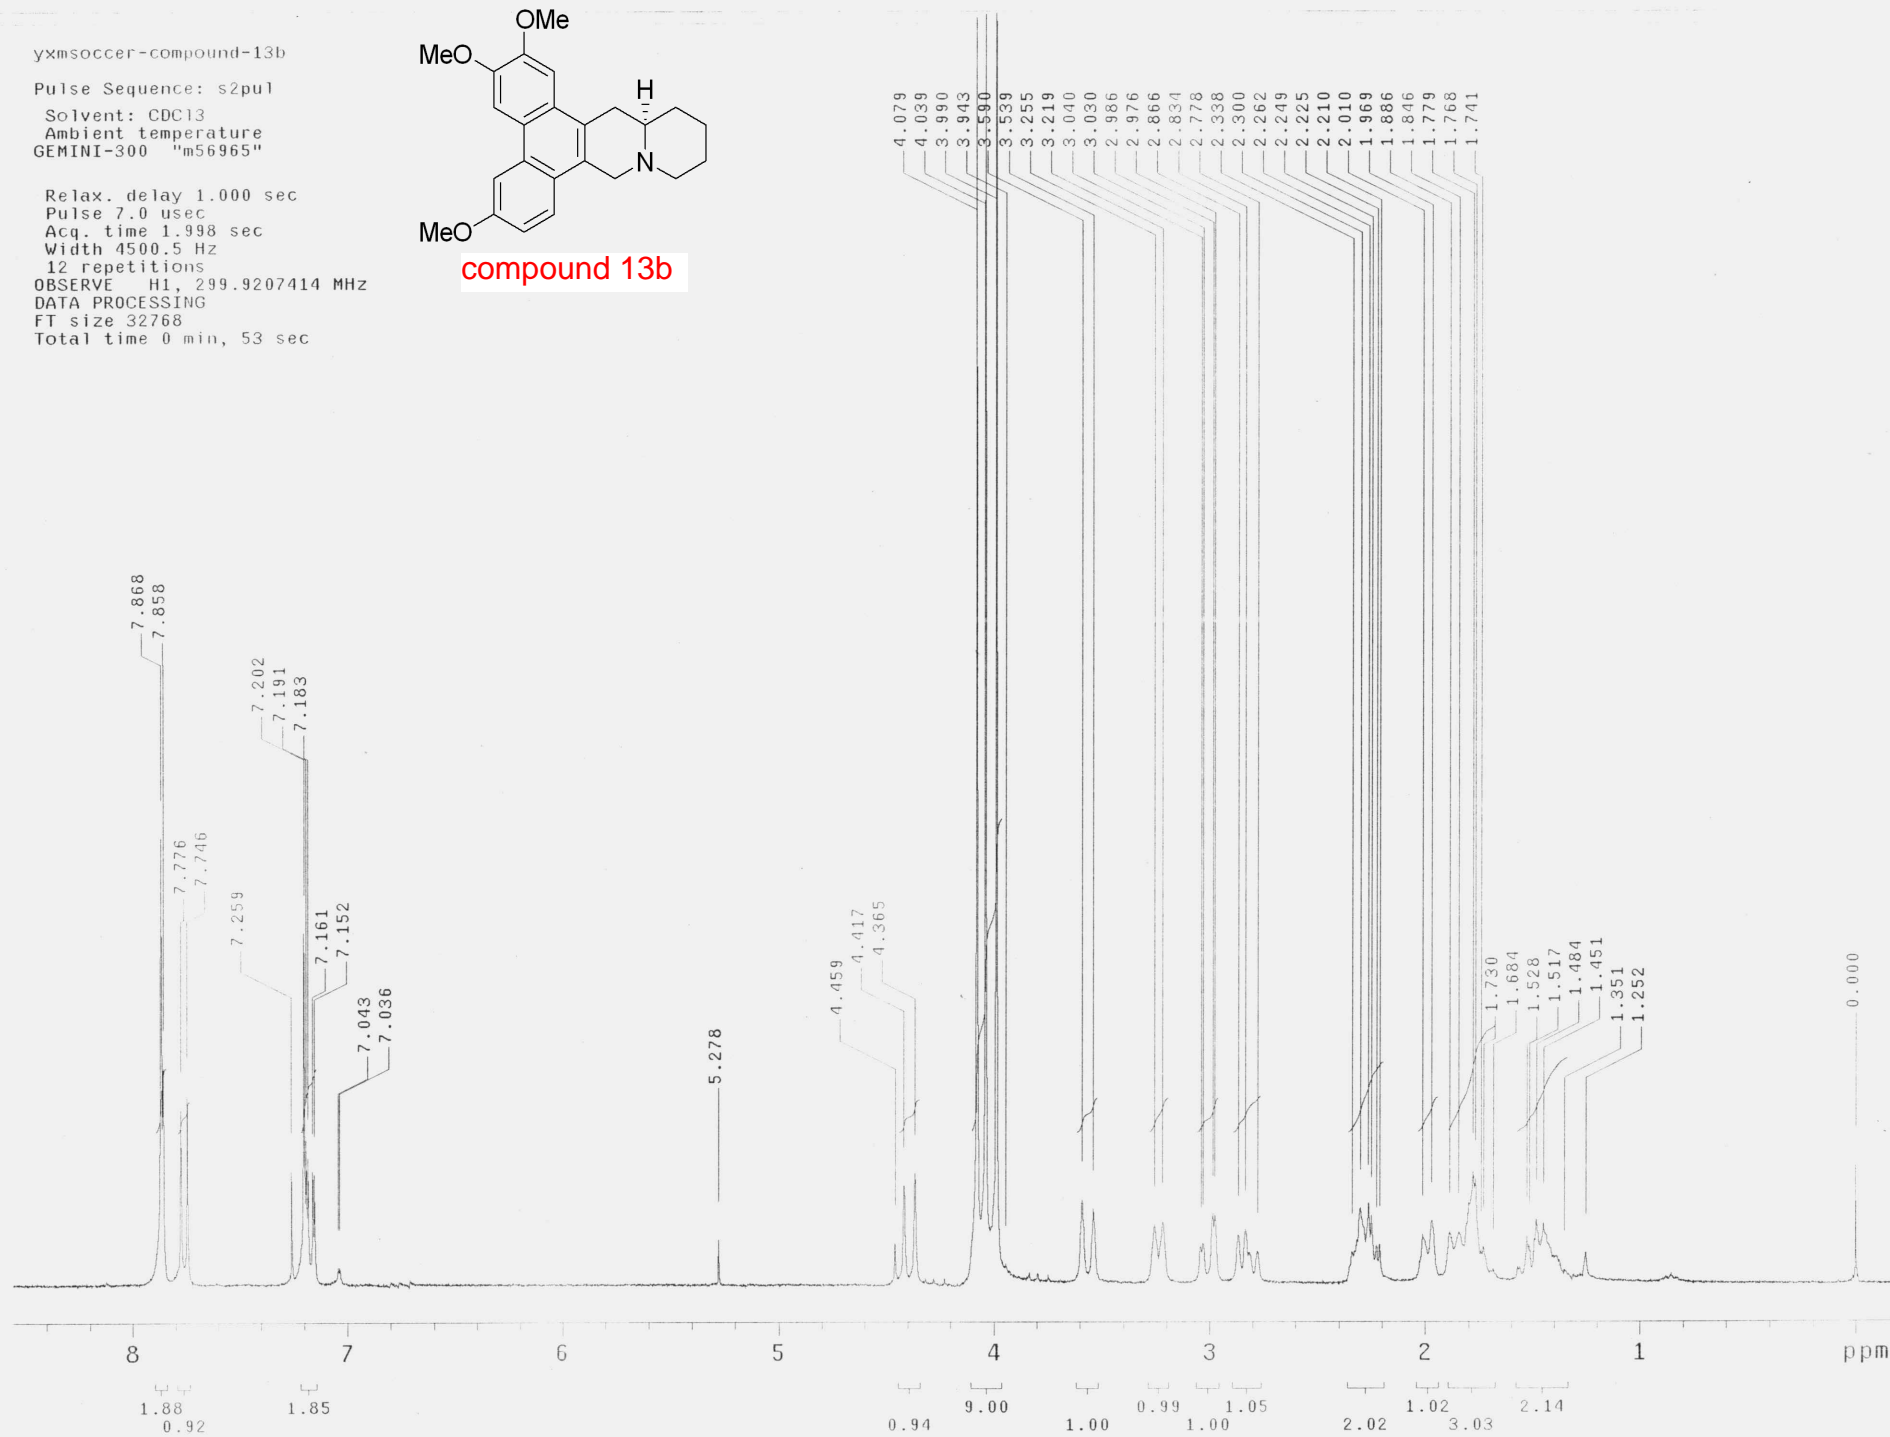



yxmsoccer-compound-13b

Pulse Sequence: s2pul

Solvent: CDC13  
Ambient temperature  
GEMINI-300 "m56965"

Relax. delay 0.100 sec  
Pulse 8.0 usec  
Acq. time 1.706 sec  
Width 18761.7 Hz  
952 repetitions  
OBSERVE C13, 75.4151254 MHz  
DECOUPLE H1, 299.9222403 MHz  
Power 0 dB  
continuously on  
WALTZ-16 modulated  
DATA PROCESSING  
Line broadening 1.0 Hz  
FT size 65536  
Total time 15 hr, 44 min, 54 sec

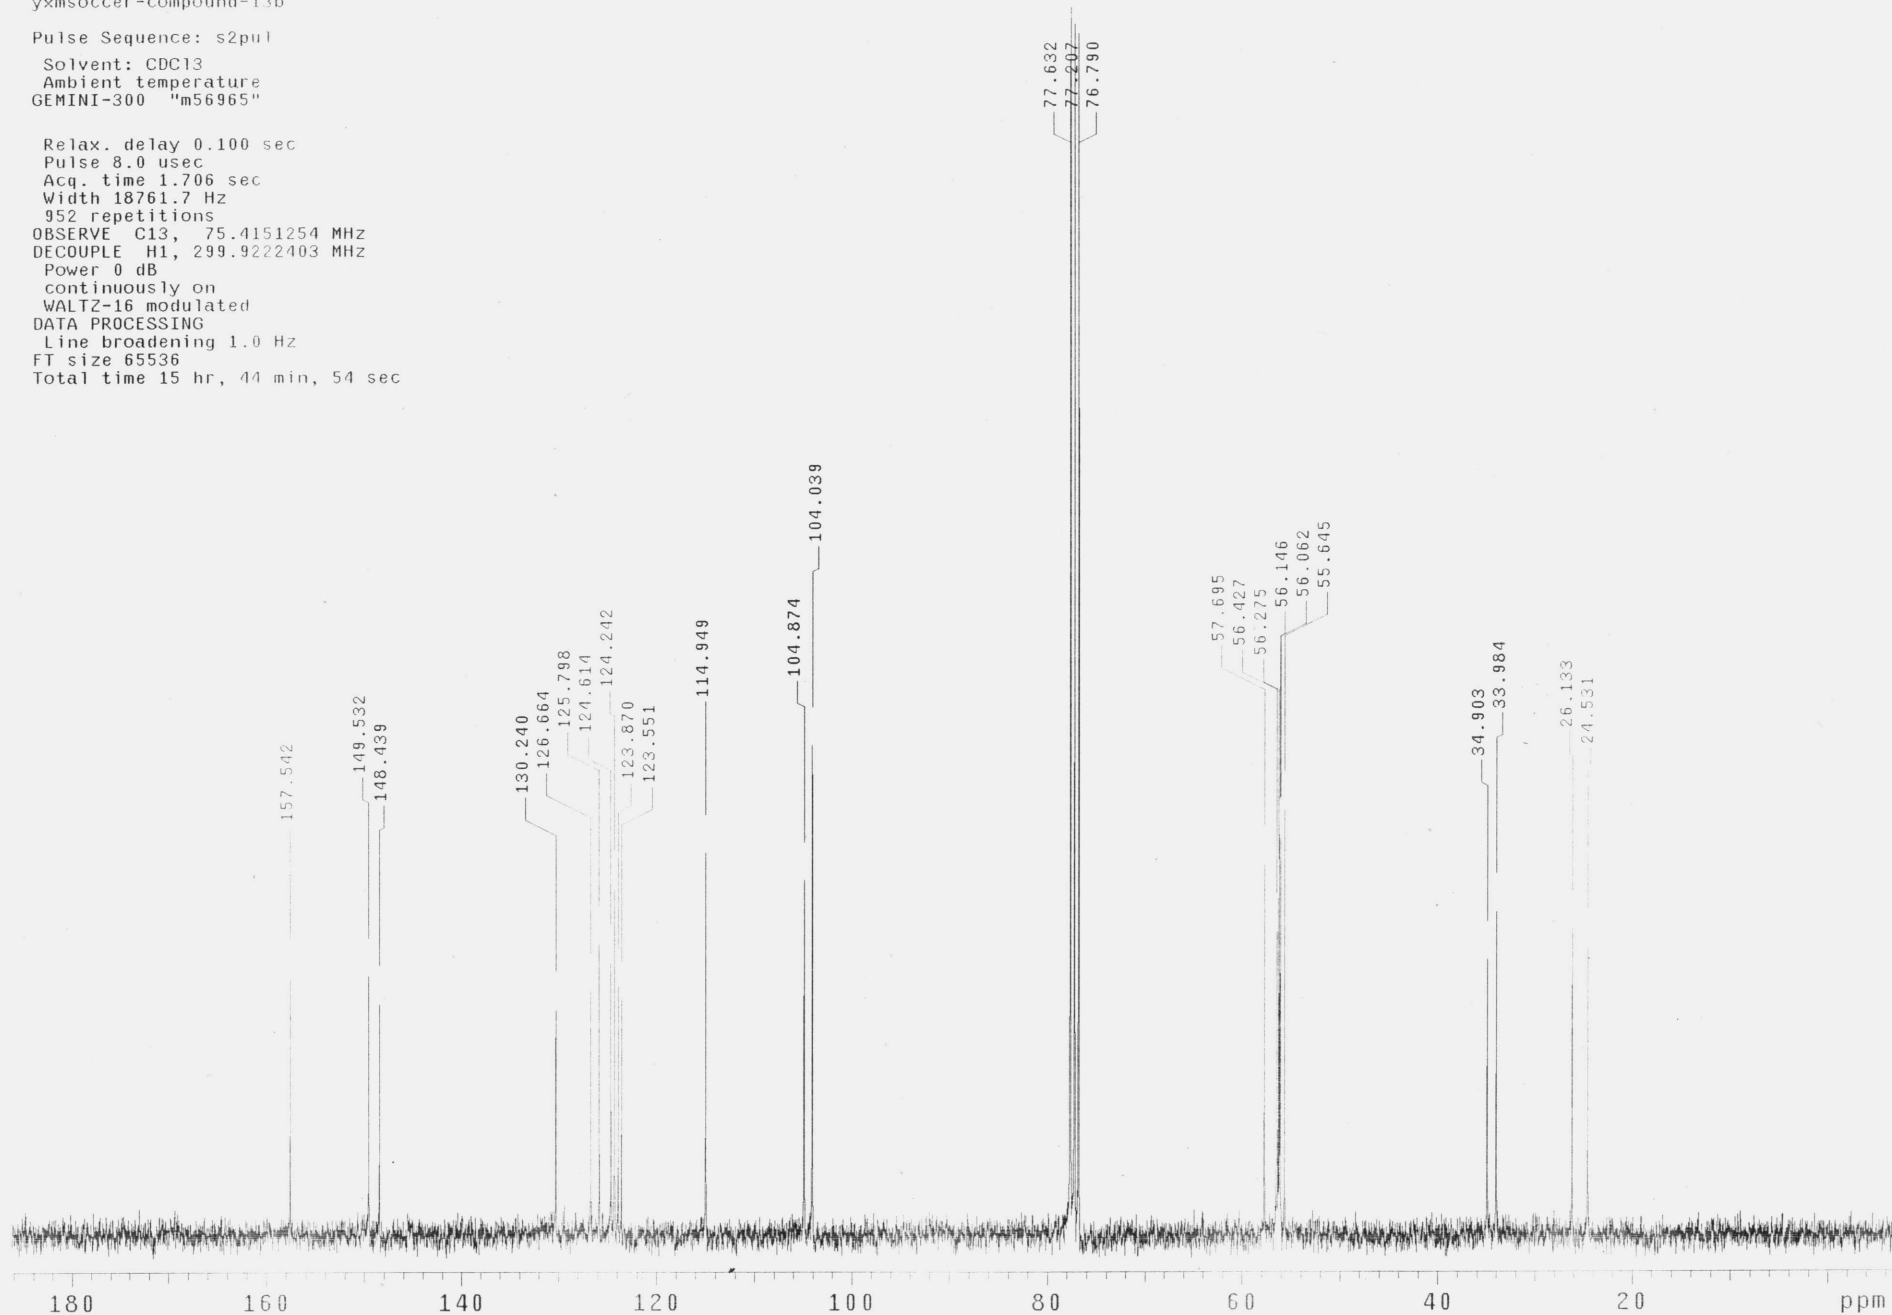

yxmsoccer-compound-13c

Pulse Sequence: s2pu1

Solvent: CDC13  
Ambient temperature  
GEMINI-300 "m56965"

Relax. delay 1.000 sec  
Pulse 7.0 usec  
Acq. time 1.998 sec  
Width 4500.5 Hz  
60 repetitions  
OBSERVE H1, 299.9337832 MHz  
DATA PROCESSING  
FT size 32768  
Total time 3 min, 35 sec

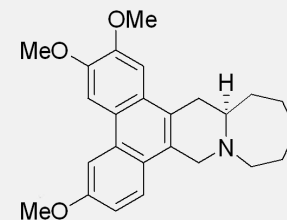

compound 13c (E7)

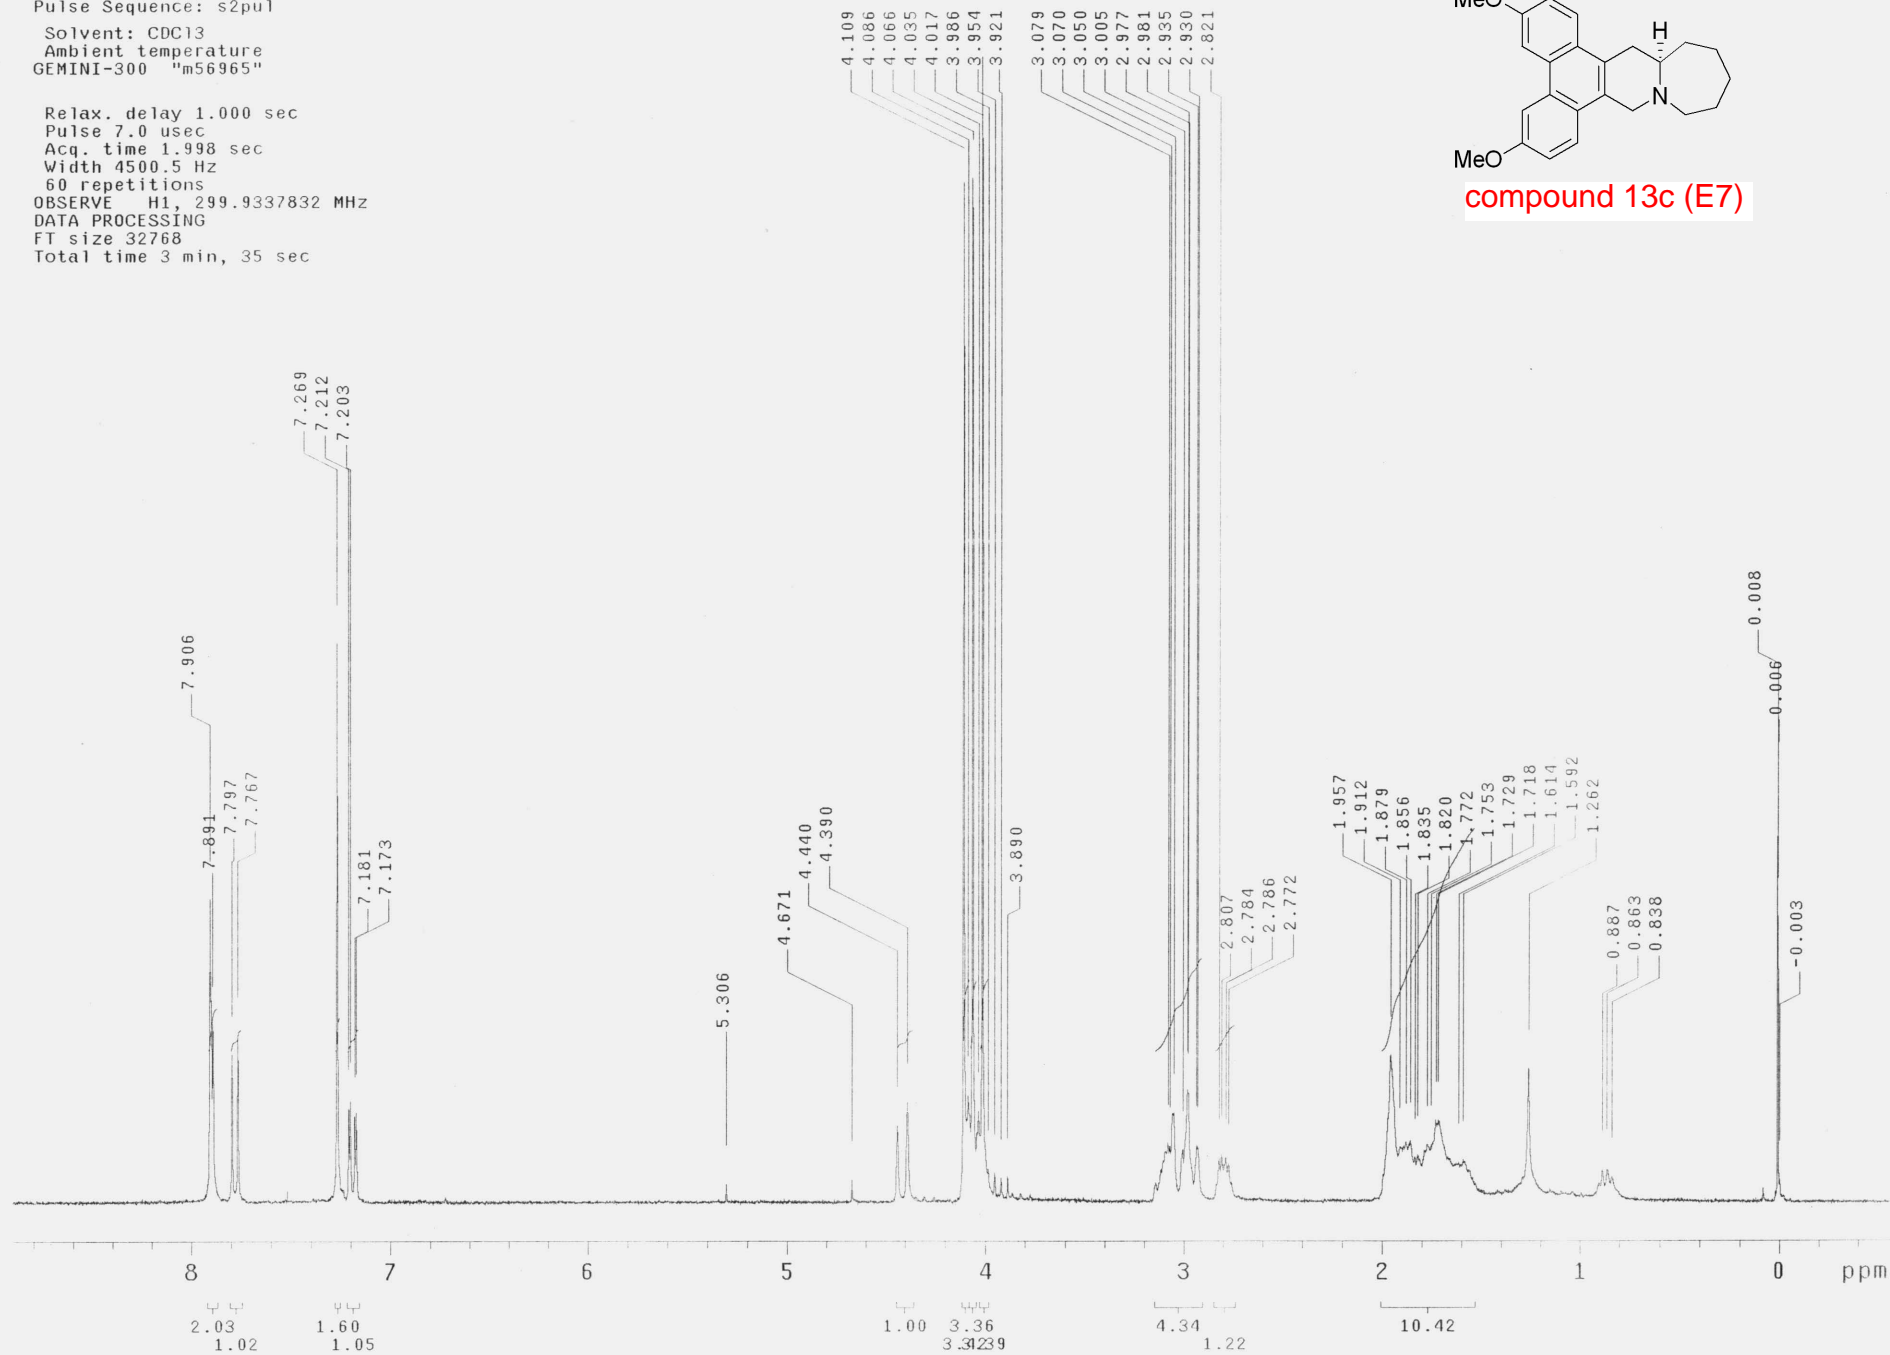

yxmsoccer-compound-13c

Pulse Sequence: s2pul

Solvent: CDC13  
Ambient temperature  
GEMINI-300 "m56965"

Relax. delay 0.100 sec  
Pulse 8.0 usec  
Acq. time 1.706 sec  
Width 18761.7 Hz  
2184 repetitions  
OBSERVE C13, 75.4184026 MHz  
DECOUPLE H1, 299.9352868 MHz  
Power 0 dB  
continuously on  
WALTZ-16 modulated  
DATA PROCESSING  
Line broadening 1.0 Hz  
FT size 65536  
Total time 4 hr, 43 min, 28 sec

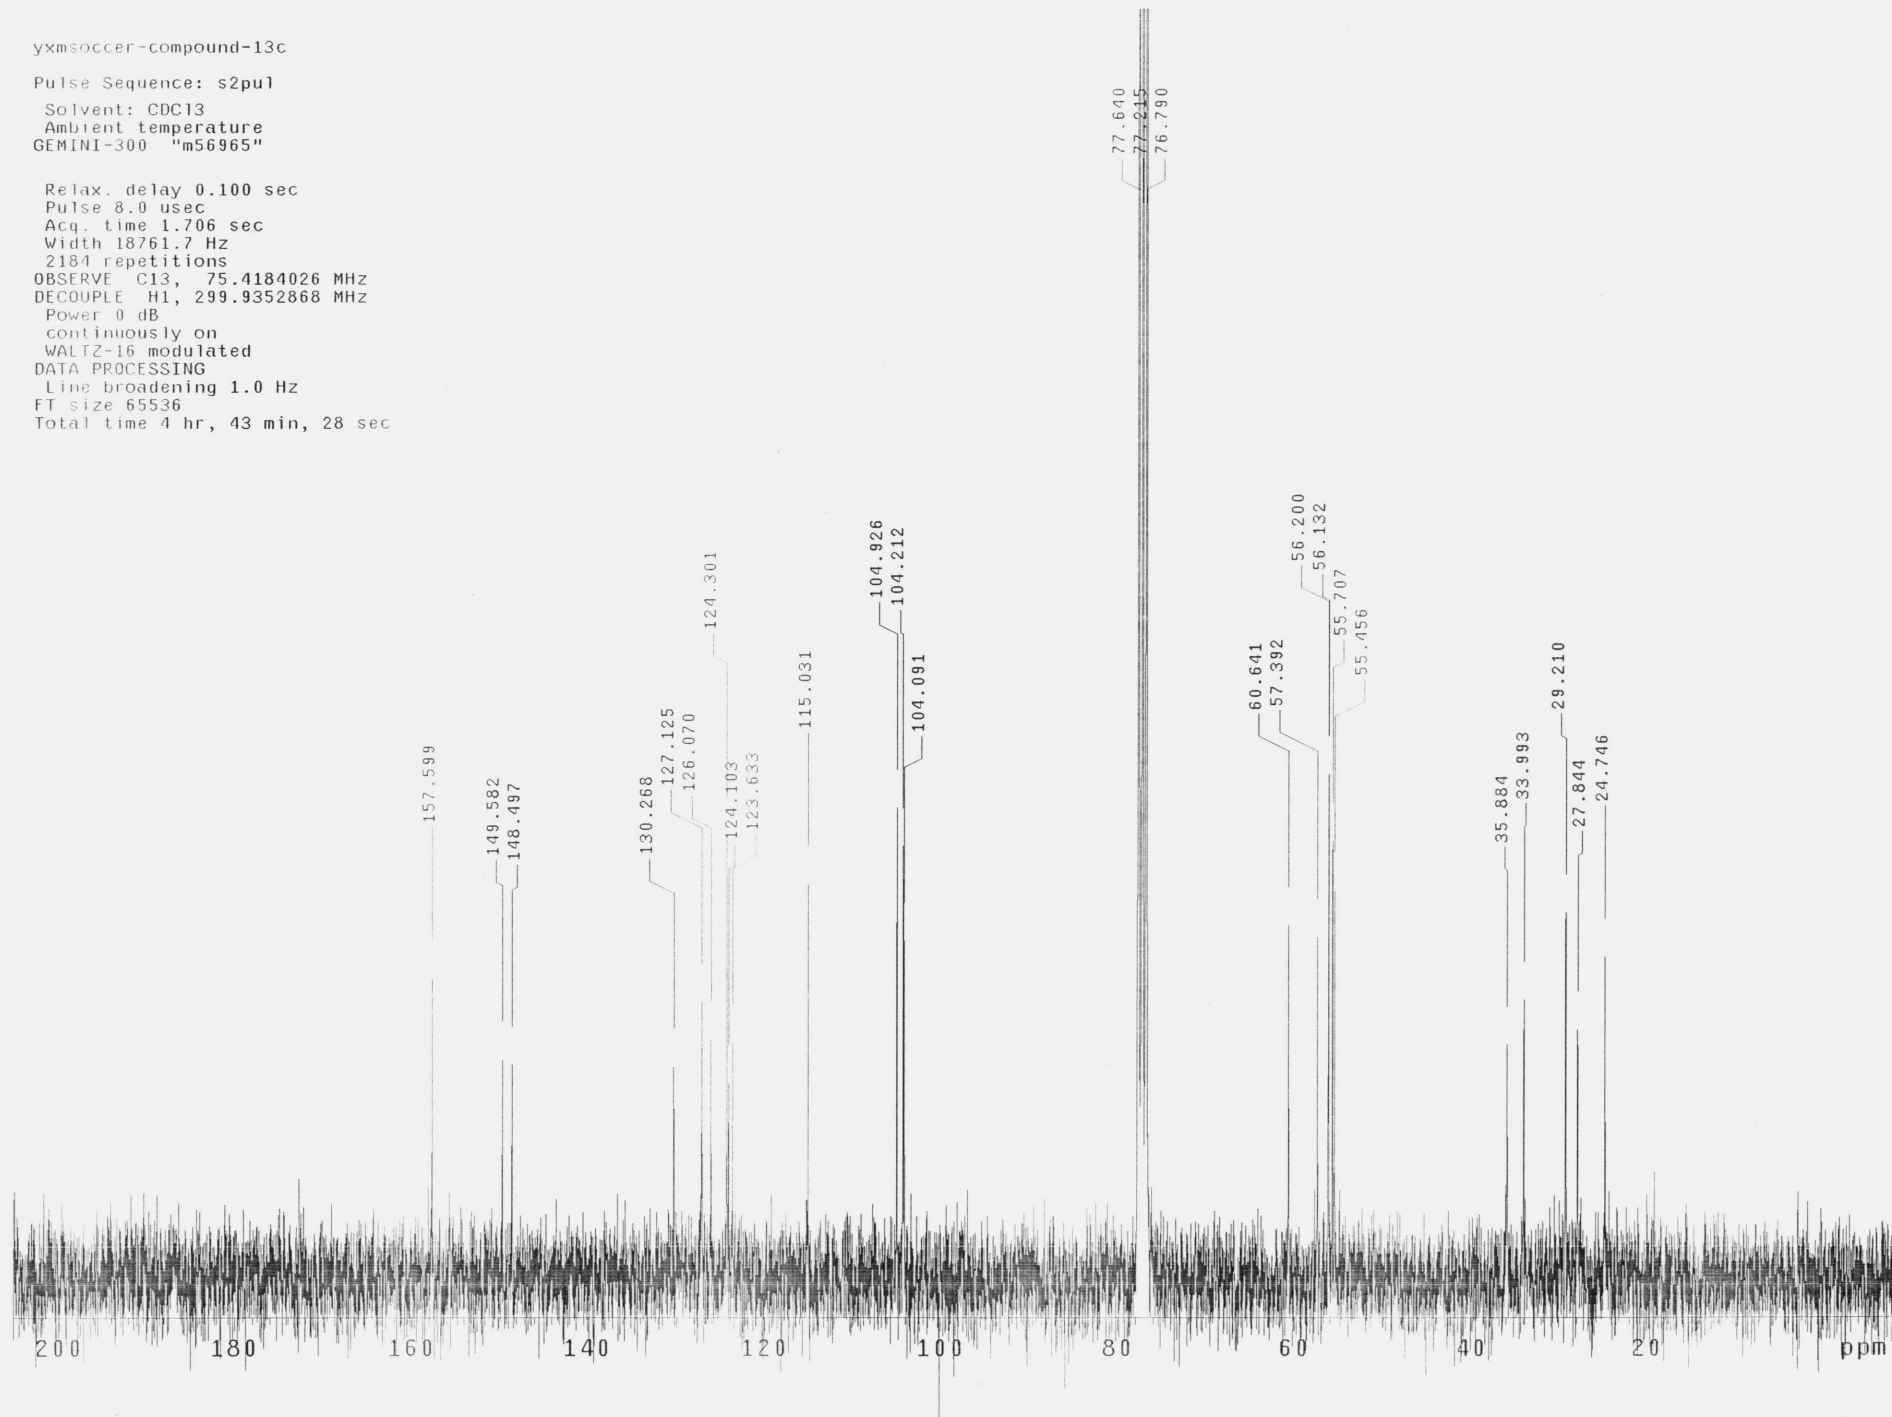

yxm-J0C-17

File: Proton

Pulse Sequence: s2pu1

Solvent: cdc13  
Temp. 26.0 C / 299.1 K  
Operator: xiaoming  
INOVA-400 "kerr-inova400.pha.unc.edu"

Relax. delay 1.000 sec  
Pulse 45.0 degrees  
Acq. time 2.049 sec  
Width 4798.5 Hz  
16 repetitions  
OBSERVE H1, 399.8639779 MHz  
DATA PROCESSING  
Line broadening 0.2 Hz  
FT size 65536  
Total time 0 min, 55 sec

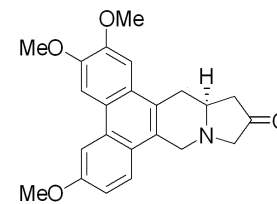

compound 17

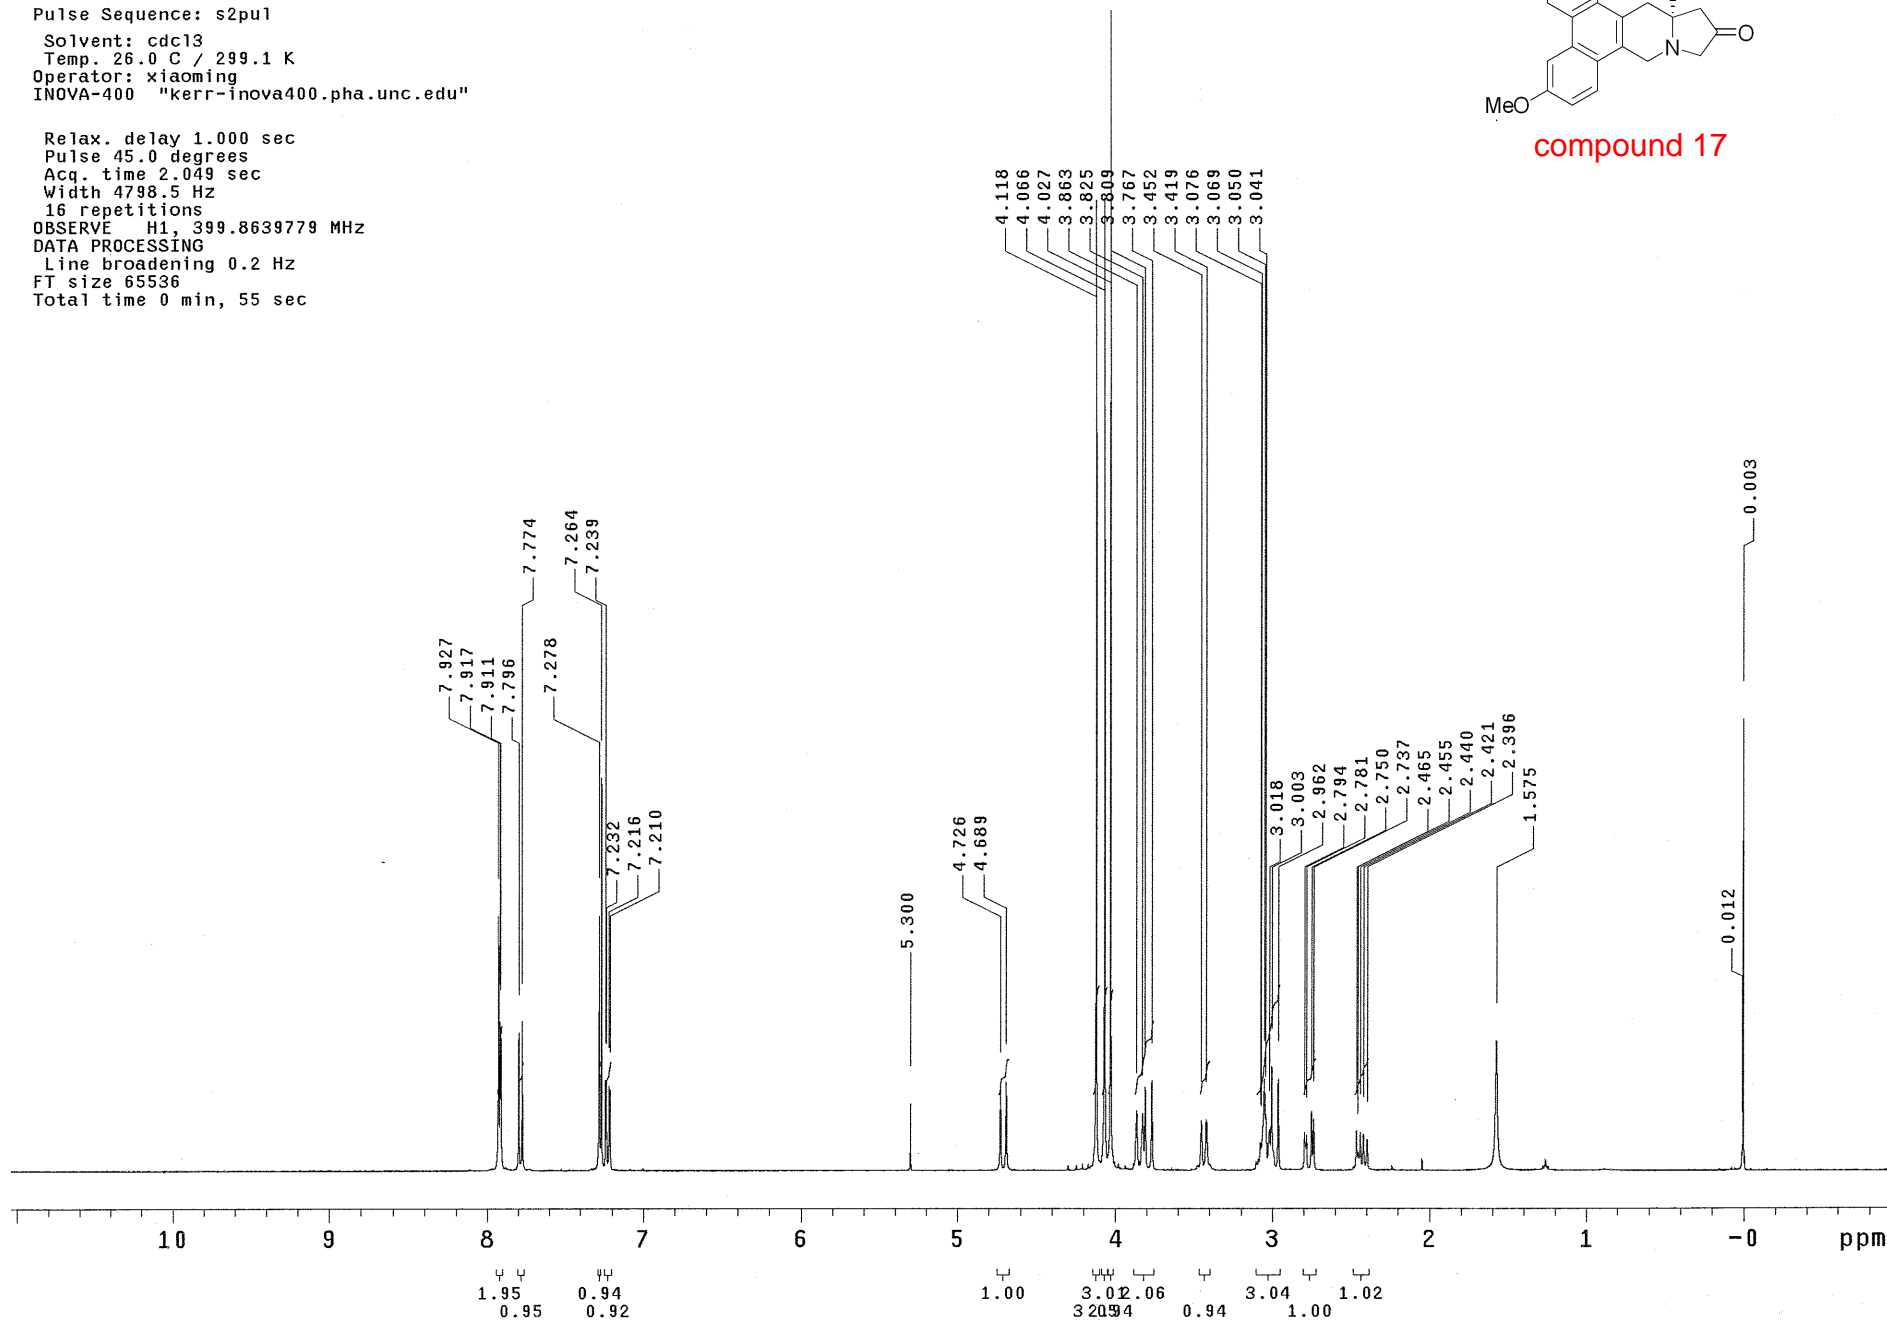

yxm-J0C-17-carbon

File: Carbon

Pulse Sequence: s2pu1

Solvent: cdc13  
Temp. 26.0 C / 299.1 K  
Operator: xiaoming  
INOVA-400 "kerr-inova400.pha.unc.edu"

Relax. delay 1.000 sec  
Pulse 45.0 degrees  
Acq. time 1.300 sec  
Width 24132.7 Hz  
15688 repetitions  
OBSERVE C13, 100.5458759 MHz  
DECOUPLE H1, 399.8659917 MHz  
Power 32 dB  
continuously on  
WALTZ-16 modulated  
DATA PROCESSING  
Line broadening 0.5 Hz  
FT size 65536  
Total time 12 hr, 49 min, 47 sec

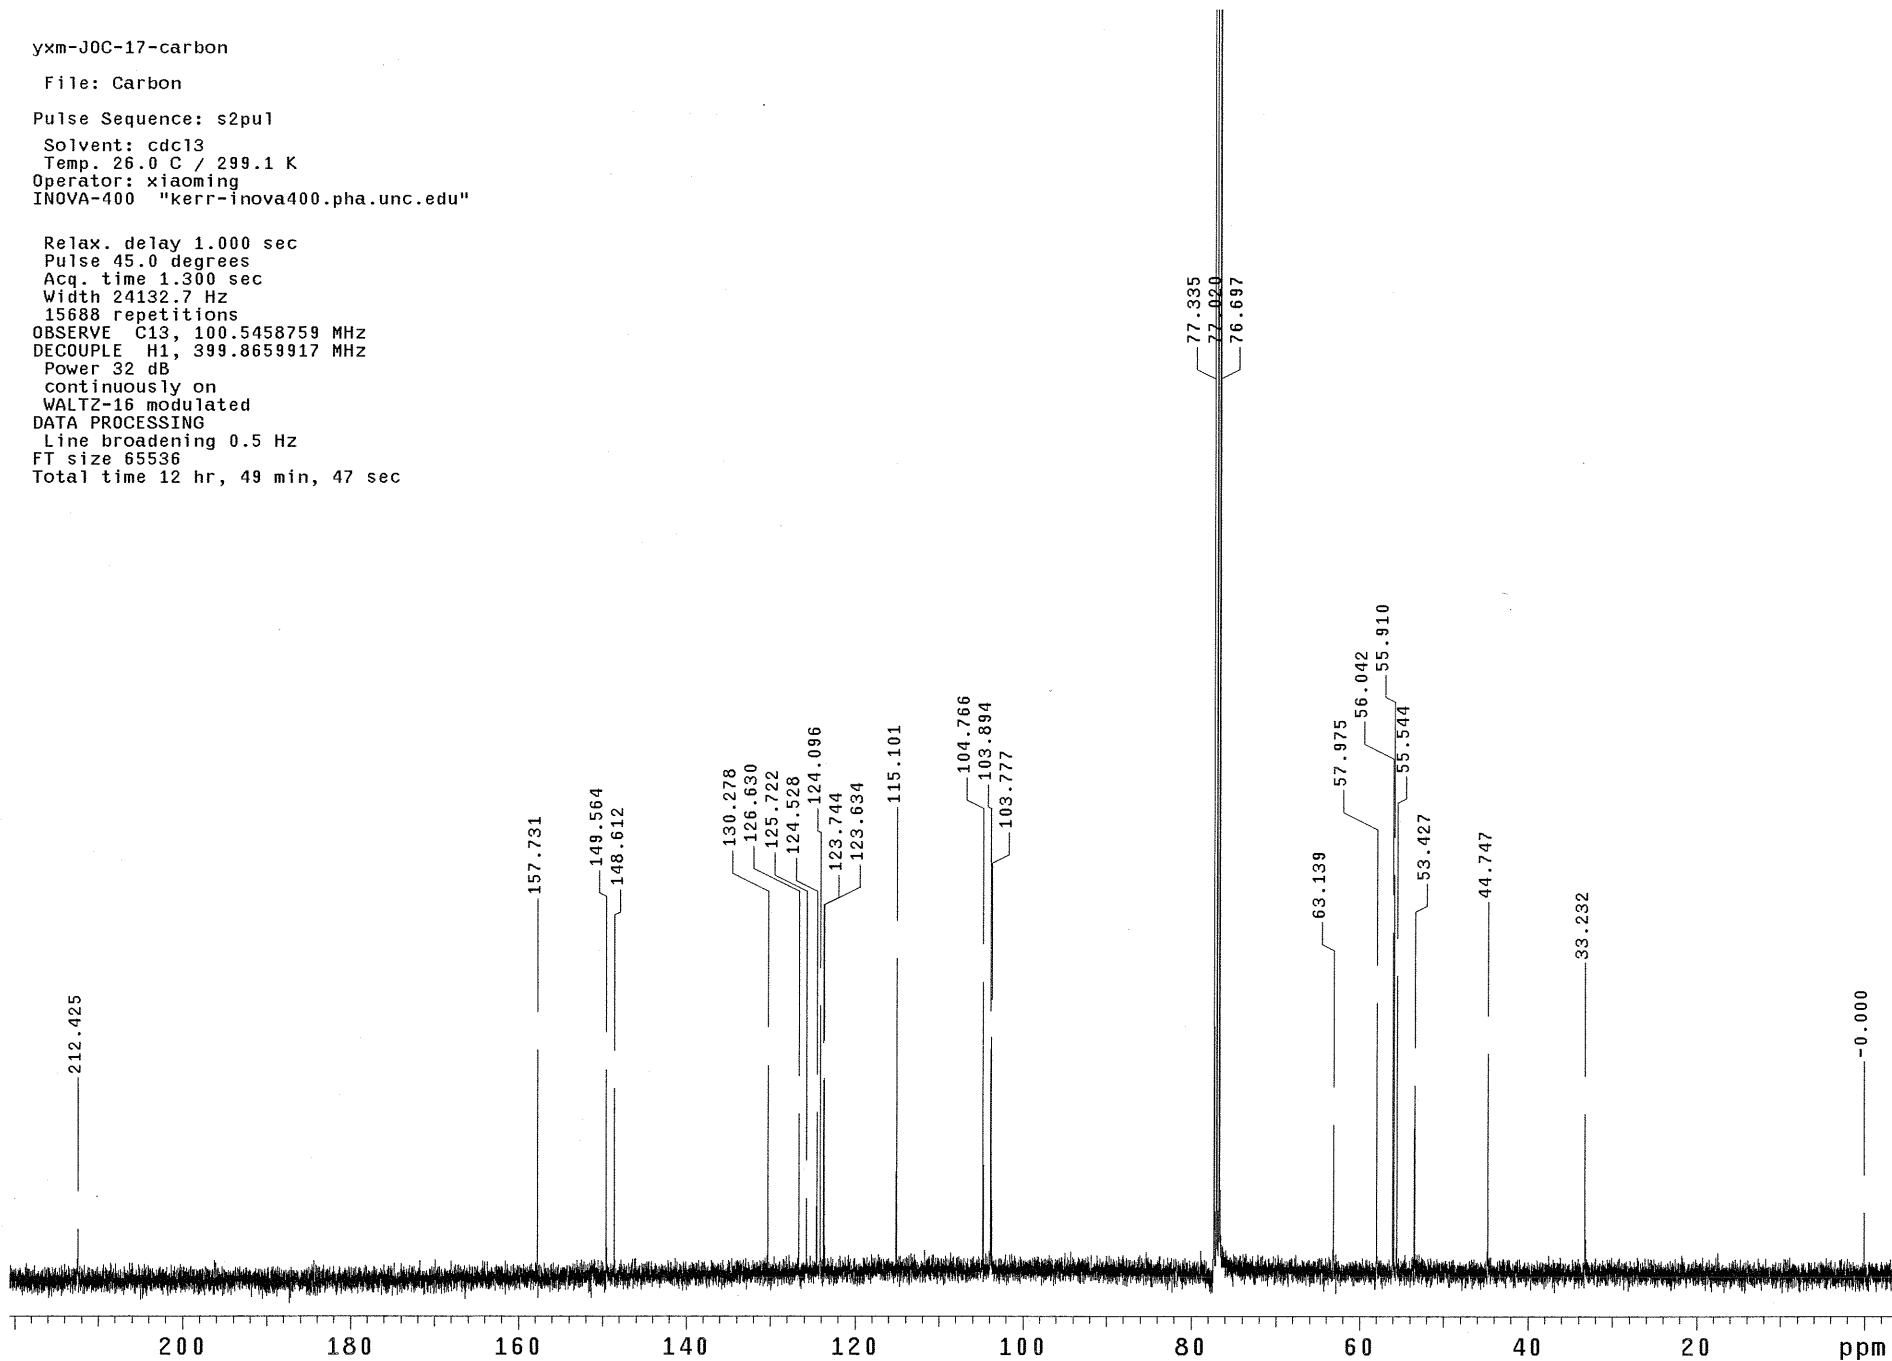

yxm181-joc-18

Pulse Sequence: s2pu1

Solvent: CDC13  
Ambient temperature  
GEMINI-300 "m56965"

Relax. delay 1.000 sec  
Pulse 7.0 usec  
Acq. time 1.998 sec  
Width 4500.5 Hz  
64 repetitions  
OBSERVE H1, 299.9207370 MHz  
DATA PROCESSING  
FT size 32768  
Total time 3 min, 35 sec

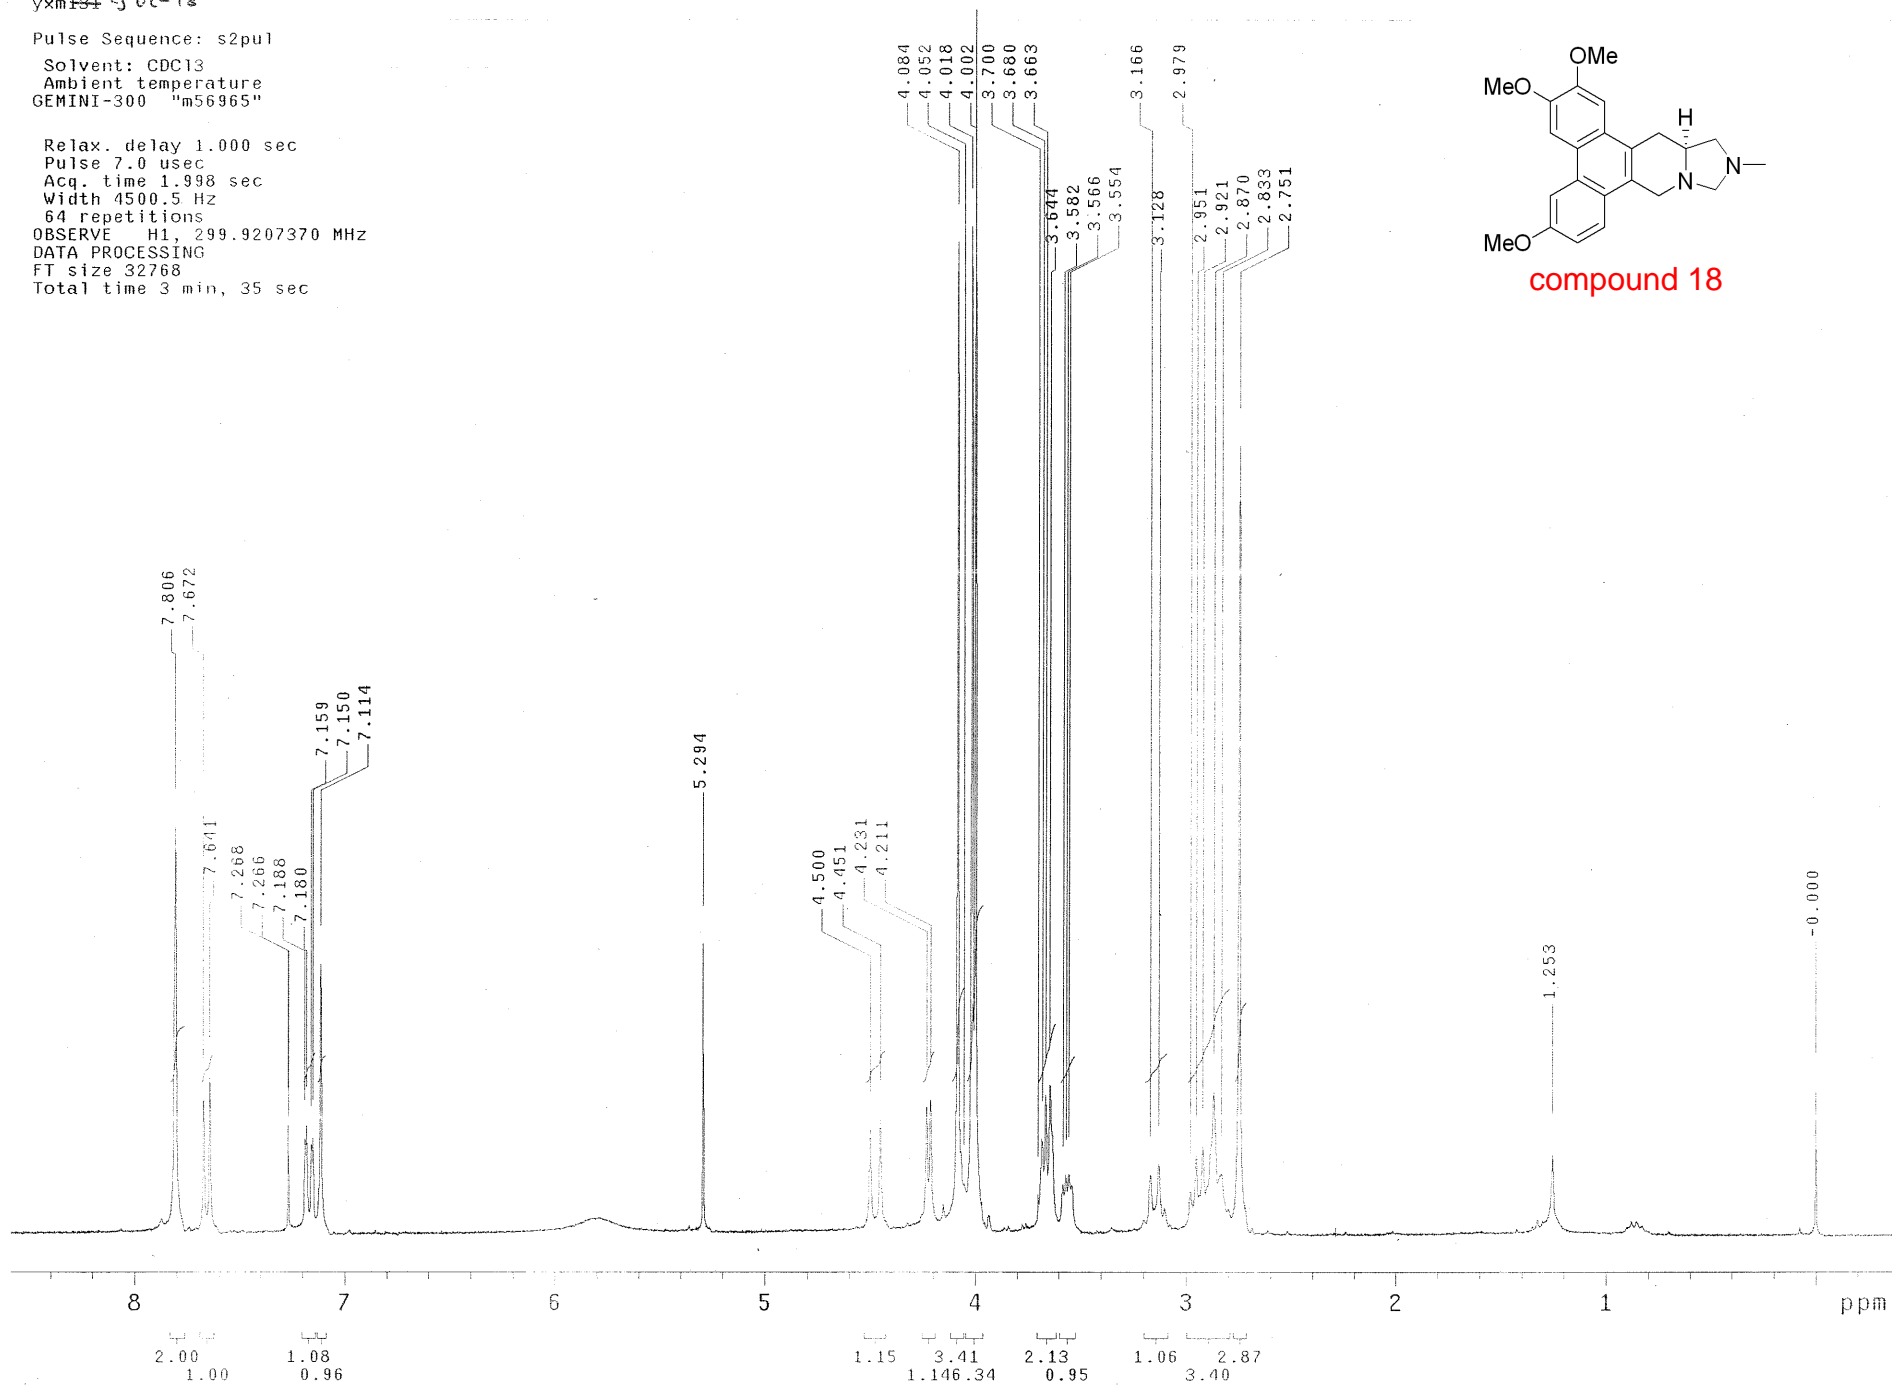

compound 18

yxm-J0C-18-carbon

File: Carbon

Pulse Sequence: s2pul

Solvent: cdc13  
Temp. 26.0 C / 299.1 K  
Operator: xiaoming  
INOVA-400 "kerr-inova400.pha.unc.edu"

Relax. delay 1.000 sec  
Pulse 45.0 degrees  
Acq. time 1.300 sec  
Width 24132.7 Hz  
2912 repetitions  
OBSERVE C13, 100.5458547 MHz  
DECOUPLE H1, 399.8659917 MHz  
Power 32 dB  
continuously on  
WALTZ-16 modulated  
DATA PROCESSING  
Line broadening 0.5 Hz  
FT size 65536  
Total time 3 hr, 12 min, 26 sec

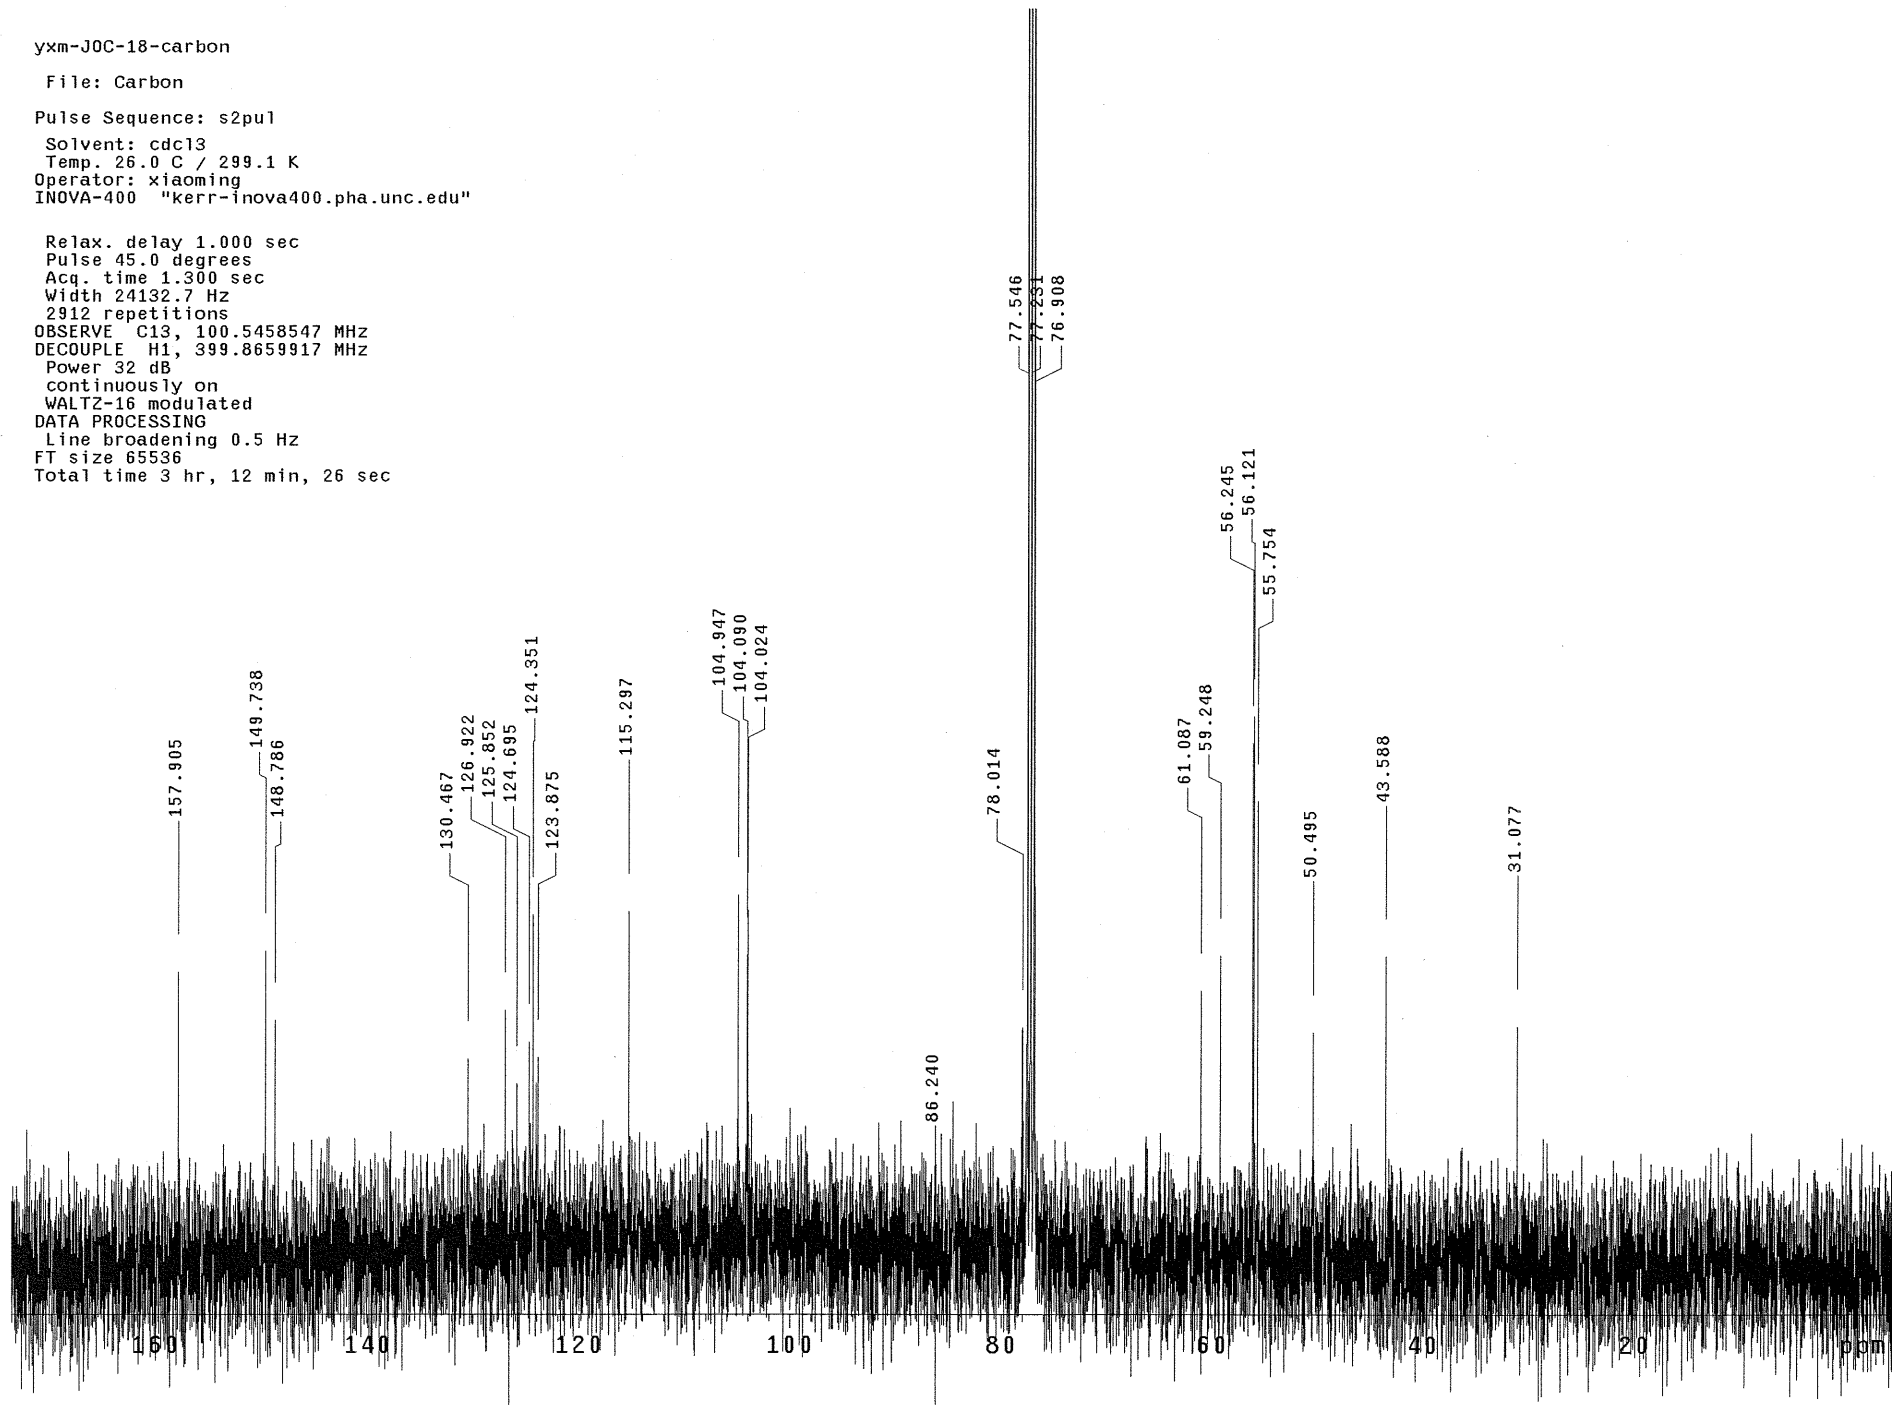

Supplement: NIHMS184742-supplement-3_si_003.pdf [file NIHMS184742-supplement-3_si_003.pdf]
